# Supplementary material for: Molecular Epidemiology Characteristics of Brucella abortus Strains in China and Their Relationships with World Lineages
Source: Preprints.org preprint supplement (doi:10.20944/preprints202011.0632.v1), 2020-11-25
Supplement: Supplementary file 1 [file supplementary]

## Sheet: world abortus
Table S3. A total of 1525 B. abortus strains were used to assess the genetic relationships between Brucella strains from this study and other global geographical locations
key	index_temp	strain	Bruce06	Bruce08	Bruce11	Bruce12	Bruce42	Bruce43	Bruce45	Bruce55	Bruce18	Bruce19	Bruce21	Bruce04	Bruce07	Bruce09	Bruce16	Bruce30	GT_MLVA8	GT_MLVA11	speciesbiovar	host	isolated_in	year
2006LeFleche#009	9	REF 870	3	5	3	12	2	2	3	3	7	43	8	3	6	3	3	3	40	66	B. abortus bv6	Cattle	Africa
2009Her#006	412	KRef06	3	5	3	12	2	2	3	3	7	43	8	3	6	3	3	3	40	66	B. abortus bv6	Cattle	Africa
2006LeFleche#104	104	BCCN#95-51	4	5	4	12	2	2	3	3	6	43	8	3	4	3	6	5	28	82	B. abortus bv1	Cattle	Argentina	1995
2017Islam#01	2979	21/S-4023	3	5	3	12	2	2	3	3	7	43	8	5	4	3	3	3	40	66	B. abortus bv3	Cattle	Bangladesh	2017
2017Islam#02	2980	46/S-5083	3	5	3	12	2	2	3	3	7	43	8	5	4	3	3	3	40	66	B. abortus bv3	Cattle	Bangladesh	2017
2017Islam#03	2981	49/ G-7	3	5	3	12	2	2	3	3	7	43	8	5	4	3	3	3	40	66	B. abortus bv3	Cattle	Bangladesh	2017
2017Islam#04	2982	61/ S-1000	3	5	3	12	2	2	3	3	7	43	8	5	4	3	3	3	40	66	B. abortus bv3	Cattle	Bangladesh	2017
2017Islam#05	2983	66/G-12	3	5	3	12	2	2	3	3	7	43	8	5	4	3	3	3	40	66	B. abortus bv3	Cattle	Bangladesh	2017
2017Islam#06	2984	72/ G-22	3	5	3	12	2	2	3	3	7	43	8	5	4	3	3	3	40	66	B. abortus bv3	Cattle	Bangladesh	2017
2017Islam#07	2985	84/S-756	3	5	3	12	2	2	3	3	7	43	8	5	4	3	3	3	40	66	B. abortus bv3	Cattle	Bangladesh	2017
2017Islam#08	2986	106/G-5213	3	5	3	12	2	2	3	3	7	43	8	5	4	3	3	3	40	66	B. abortus bv3	Cattle	Bangladesh	2017
2017Islam#09	2987	107/S-55	3	5	3	12	2	2	3	3	7	43	8	5	4	3	3	3	40	66	B. abortus bv3	Cattle	Bangladesh	2017
2017Islam#10	2988	109/S-1978	3	5	3	12	2	2	3	3	7	43	8	5	4	3	3	3	40	66	B. abortus bv3	Cattle	Bangladesh	2017
2006LeFleche#117	117	BCCN#80-133	3	5	3	12	2	2	2	3	7	43	8	4	5	3	4	3	39	67	B. abortus bv9	Dog	Belgium	1980
2017Hanot-Mambres#07	2801	L3/129	4	5	4	12	2	2	3	3	6	43	8	3	1	6	3	6	28	82	B. abortus bv1	Human	Belgium	2000
2017Hanot-Mambres#22	2816	L3/173	4	6	3	12	2	2	3	3	6	43	8	5	4	3	5	5	185	363	B. abortus bv1	Human	Belgium	2010
2013Minharro#070	2045	211	3	5	3	12	2	2	3	3	7	43	8	14	4	3	3	3	40	66	B. abortus bv3	Cattle	Brazil	2008
2013Minharro#058	2033	196	3	5	3	12	2	2	3	3	7	43	8	5	2	3	4	3	40	66	B. abortus bv3	Cattle	Brazil	2008
2013Minharro#062	2037	201	3	5	3	12	2	2	3	3	7	43	8	4	4	3	4	3	40	66	B. abortus bv3	Cattle	Brazil	2008
2013Minharro#025	2000	62	3	5	3	12	2	2	3	3	7	43	8	7	4	3	3	3	40	66	B. abortus bv3	Cattle	Brazil	2008
2013Minharro#026	2001	66	3	5	3	12	2	2	3	3	7	43	8	9	4	3	3	3	40	66	B. abortus bv3	Cattle	Brazil	2008
2013Minharro#027	2002	70	3	5	3	12	2	2	3	3	7	43	8	8	6	3	3	3	40	66	B. abortus bv6	Cattle	Brazil	2007
2013Minharro#059	2034	198	3	5	3	12	2	2	3	3	7	43	8	13	4	3	4	3	40	66	B. abortus bv3	Cattle	Brazil	2008
2013Minharro#061	2036	200	3	5	3	12	2	2	3	3	7	43	8	14	4	3	4	3	40	66	B. abortus bv3	Cattle	Brazil	2008
2013Minharro#071	2046	216	3	5	3	12	2	2	3	3	7	43	8	14	4	3	3	3	40	66	B. abortus bv3	Cattle	Brazil	2008
2013Minharro#074	2049	219	3	5	3	12	2	2	3	3	7	43	8	4	4	3	3	3	40	66	B. abortus bv3	Cattle	Brazil	2008
2013Minharro#045	2020	172	3	5	3	12	2	2	3	3	7	43	8	6	4	3	3	3	40	66	B. abortus bv6	Cattle	Brazil	2008
2013Minharro#043	2018	169	3	5	3	12	2	2	3	3	7	43	8	7	4	3	3	3	40	66	B. abortus bv6	Cattle	Brazil	2008
2013Minharro#047	2022	174	3	5	3	12	2	2	3	3	7	43	8	5	4	3	3	3	40	66	B. abortus bv3	Cattle	Brazil	2008
2013Minharro#046	2021	173	3	5	3	12	2	2	3	3	7	43	8	6	4	3	3	3	40	66	B. abortus bv6	Cattle	Brazil	2008
2013Minharro#066	2041	206	3	5	3	12	2	2	3	3	7	43	8	13	4	3	3	3	40	66	B. abortus bv3	Cattle	Brazil	2008
2013Minharro#044	2019	170	3	5	3	12	2	2	3	3	7	43	8	7	4	3	3	3	40	66	B. abortus bv6	Cattle	Brazil	2008
2013Minharro#010	1985	37	3	5	3	12	2	2	3	3	7	43	8	9	4	3	3	4	40	66	B. abortus bv6	Cattle	Brazil	2006
2013Minharro#060	2035	199	3	5	3	12	2	2	3	3	7	43	8	13	4	3	4	3	40	66	B. abortus bv3	Cattle	Brazil	2008
2013Minharro#068	2043	208	3	5	3	12	2	2	3	3	7	43	8	6	4	3	3	3	40	66	B. abortus bv3	Cattle	Brazil	2008
2013Minharro#057	2032	195	3	5	3	12	2	2	3	3	7	43	8	5	4	3	4	3	40	66	B. abortus bv3	Cattle	Brazil	2008
2013Minharro#067	2042	207	3	5	3	12	2	2	3	3	7	43	8	6	4	3	3	3	40	66	B. abortus bv3	Cattle	Brazil	2008
2013Minharro#090	2065	17b/02	3	5	3	12	2	2	3	3	7	43	8	7	5	3	3	3	40	66	B. abortus bv6	Cattle	Brazil	2002
2013Minharro#040	2015	166	3	5	3	12	2	2	3	3	7	43	8	5	4	3	3	3	40	66	B. abortus bv6	Cattle	Brazil	2008
2013Minharro#041	2016	167	3	5	3	12	2	2	3	3	7	43	8	12	4	3	3	3	40	66	B. abortus bv6	Cattle	Brazil	2008
2013Minharro#042	2017	168	3	5	3	12	2	2	3	3	7	43	8	5	4	3	3	3	40	66	B. abortus bv6	Cattle	Brazil	2008
2013Minharro#032	2007	138	4	5	4	12	2	2	3	3	6	45	8	4	5	3	3	5	28	75	B. abortus bv1	Cattle	Brazil	2007
2013Minharro#033	2008	144	4	5	4	12	2	2	3	3	6	45	8	3	5	3	3	6	28	75	B. abortus bv1	Cattle	Brazil	2007
2013Minharro#034	2009	147	4	5	4	12	2	2	3	3	6	45	8	3	6	3	3	5	28	75	B. abortus bv1	Cattle	Brazil	2007
2013Minharro#008	1983	35	4	5	4	12	2	2	3	3	6	45	8	4	4	3	4	5	28	75	B. abortus bv2	Cattle	Brazil	2006
2013Minharro#009	1984	36	4	5	4	12	2	2	3	3	6	45	8	4	4	3	4	5	28	75	B. abortus bv2	Cattle	Brazil	2006
2013Minharro#069	2044	209	3	5	4	12	2	2	3	3	6	43	8	4	4	3	5	6	33	76	B. abortus bv2	Cattle	Brazil	2008
2013Minharro#098	2073	RS 3	3	5	4	12	2	2	3	3	6	43	8	3	5	3	3	5	33	76	B. abortus bv1	Cattle	Brazil	2004
2013Minharro#048	2023	175	3	5	4	12	2	2	3	3	6	43	8	5	4	3	8	7	33	76	B. abortus bv1	Cattle	Brazil	2008
2013Minharro#122	2097	5_1	4	5	4	12	2	2	3	3	6	43	8	3	4	3	5	5	28	82	B. abortus bv1	Cattle	Brazil
2013Minharro#125	2100	6_1	4	5	4	12	2	2	3	3	6	43	8	3	4	3	5	7	28	82	B. abortus bv1	Cattle	Brazil
2013Minharro#126	2101	388-01	4	5	4	12	2	2	3	3	6	43	8	3	4	3	4	5	28	82	B. abortus bv1	Cattle	Brazil
2013Minharro#127	2102	147-6	4	5	4	12	2	2	3	3	6	43	8	3	4	3	4	5	28	82	B. abortus bv1	Cattle	Brazil
2013Minharro#128	2103	393-11	4	5	4	12	2	2	3	3	6	43	8	3	4	3	4	6	28	82	B. abortus bv1	Cattle	Brazil
2013Minharro#119	2094	Para铆	4	5	4	12	2	2	3	3	6	43	8	3	4	3	4	6	28	82	B. abortus bv2	Cattle	Brazil
2013Minharro#123	2098	5_2	4	5	4	12	2	2	3	3	6	43	8	3	4	3	5	5	28	82	B. abortus bv2	Cattle	Brazil
2013Minharro#124	2099	5_3	4	5	4	12	2	2	3	3	6	43	8	3	4	3	5	6	28	82	B. abortus bv2	Cattle	Brazil
2013Minharro#129	2104	Flor	4	5	4	12	2	2	3	3	6	43	8	3	4	3	4	6	28	82	B. abortus bv2	Cattle	Brazil
2013Minharro#056	2031	194	4	5	4	12	2	2	3	3	6	43	8	3	4	3	3	7	28	82	B. abortus bv1	Cattle	Brazil	2008
2013Minharro#004	1979	30	4	5	4	12	2	2	3	3	6	43	8	3	4	3	4	5	28	82	B. abortus bv1	Cattle	Brazil	2006
2013Minharro#030	2005	136	4	5	4	12	2	2	3	3	6	43	8	4	5	3	3	5	28	82	B. abortus bv1	Cattle	Brazil	2007
2013Minharro#031	2006	137	4	5	4	12	2	2	3	3	6	43	8	3	6	3	3	5	28	82	B. abortus bv1	Cattle	Brazil	2007
2013Minharro#065	2040	205	4	5	4	12	2	2	3	3	6	43	8	4	4	3	5	8	28	82	B. abortus bv1	Cattle	Brazil	2008
2013Minharro#117	2092	GM lanag	4	5	4	12	2	2	3	3	6	43	8	3	4	3	5	5	28	82	B. abortus bv1	Cattle	Brazil	2007
2013Minharro#118	2093	Pintadinha	4	5	4	12	2	2	3	3	6	43	8	3	4	3	5	5	28	82	B. abortus bv1	Cattle	Brazil
2013Minharro#120	2095	Bawla	4	5	4	12	2	2	3	3	6	43	8	3	4	3	5	5	28	82	B. abortus bv1	Cattle	Brazil
2013Minharro#121	2096	1_1	4	5	4	12	2	2	3	3	6	43	8	3	4	3	5	8	28	82	B. abortus bv1	Cattle	Brazil
2013Minharro#130	2105	SC1	4	5	4	12	2	2	3	3	6	43	8	3	4	3	5	7	28	82	B. abortus bv1	Cattle	Brazil
2013Minharro#006	1981	33	4	5	4	12	2	2	3	3	6	43	8	3	4	3	4	5	28	82	B. abortus bv1	Cattle	Brazil	2006
2013Minharro#007	1982	34	4	5	4	12	2	2	3	3	6	43	8	3	4	3	4	5	28	82	B. abortus bv1	Cattle	Brazil	2006
2013Minharro#012	1987	39	4	5	4	12	2	2	3	3	6	43	8	3	4	3	4	5	28	82	B. abortus bv1	Cattle	Brazil	2006
2013Minharro#013	1988	40	4	5	4	12	2	2	3	3	6	43	8	3	4	3	4	5	28	82	B. abortus bv1	Cattle	Brazil	2006
2013Minharro#014	1989	42	4	5	4	12	2	2	3	3	6	43	8	3	4	3	4	4	28	82	B. abortus bv1	Cattle	Brazil	2006
2013Minharro#015	1990	43	4	5	4	12	2	2	3	3	6	43	8	3	4	3	4	4	28	82	B. abortus bv1	Cattle	Brazil	2006
2013Minharro#016	1991	44	4	5	4	12	2	2	3	3	6	43	8	3	4	3	4	4	28	82	B. abortus bv1	Cattle	Brazil	2006
2013Minharro#018	1993	46	4	5	4	12	2	2	3	3	6	43	8	3	4	3	4	4	28	82	B. abortus bv1	Cattle	Brazil	2006
2013Minharro#011	1986	38	4	5	4	12	2	2	3	3	6	43	8	4	4	3	4	5	28	82	B. abortus bv2	Cattle	Brazil	2006
2013Minharro#019	1994	47	4	5	4	12	2	2	3	3	6	43	8	3	4	3	4	4	28	82	B. abortus bv2	Cattle	Brazil	2006
2013Minharro#029	2004	96	4	5	4	12	2	2	3	3	6	43	8	5	6	3	3	5	28	82	B. abortus bv1	Cattle	Brazil	2007
2013Minharro#075	2050	223	4	5	4	12	2	2	3	3	6	43	8	3	4	3	5	5	28	82	B. abortus bv1	Cattle	Brazil	2008
2013Minharro#076	2051	224	4	5	4	12	2	2	3	3	6	43	8	3	4	3	5	5	28	82	B. abortus bv1	Cattle	Brazil	2008
2013Minharro#077	2052	01_jun	4	5	4	12	2	2	3	3	6	43	8	3	4	3	4	5	28	82	B. abortus bv1	Cattle	Brazil	2006
2013Minharro#078	2053	02_jun	4	5	4	12	2	2	3	3	6	43	8	3	4	9	4	5	28	82	B. abortus bv1	Cattle	Brazil	2006
2013Minharro#079	2054	03_jun	4	5	4	12	2	2	3	3	6	43	8	3	5	3	4	5	28	82	B. abortus bv1	Cattle	Brazil	2006
2013Minharro#080	2055	07_jun	4	5	4	12	2	2	3	3	6	43	8	3	5	3	4	5	28	82	B. abortus bv1	Cattle	Brazil	2006
2013Minharro#082	2057	11_jun	4	5	4	12	2	2	3	3	6	43	8	3	5	12	5	4	28	82	B. abortus bv1	Cattle	Brazil	2006
2013Minharro#083	2058	13_mar	4	5	4	12	2	2	3	3	6	43	8	4	4	3	5	7	28	82	B. abortus bv1	Cattle	Brazil	2003
2013Minharro#085	2060	13b/02	4	5	4	12	2	2	3	3	6	43	8	4	4	3	4	6	28	82	B. abortus bv1	Cattle	Brazil	2002
2013Minharro#086	2061	14_mar	4	5	4	12	2	2	3	3	6	43	8	3	5	3	4	5	28	82	B. abortus bv1	Cattle	Brazil	2003
2013Minharro#091	2066	29312	4	5	4	12	2	2	3	3	6	43	8	4	5	3	4	5	28	82	B. abortus bv1	Cattle	Brazil	2004
2013Minharro#095	2070	Ba 56	4	5	4	12	2	2	3	3	6	43	8	4	4	3	4	7	28	82	B. abortus bv1	Cattle	Brazil	1996
2013Minharro#096	2071	Ba96	4	5	4	12	2	2	3	3	6	43	8	3	4	3	4	7	28	82	B. abortus bv1	Cattle	Brazil	1977
2013Minharro#097	2072	RS 1	4	5	4	12	2	2	3	3	6	43	8	3	5	3	4	7	28	82	B. abortus bv1	Cattle	Brazil	2004
2013Minharro#099	2074	RS 4	4	5	4	12	2	2	3	3	6	43	8	4	5	3	4	5	28	82	B. abortus bv1	Cattle	Brazil
2013Minharro#103	2078	RS 8	4	5	4	12	2	2	3	3	6	43	8	4	5	4	6	5	28	82	B. abortus bv1	Cattle	Brazil	2007
2013Minharro#107	2082	SP 2	4	5	4	12	2	2	3	3	6	43	8	3	5	3	6	5	28	82	B. abortus bv1	Cattle	Brazil
2013Minharro#109	2084	SP 4	4	5	4	12	2	2	3	3	6	43	8	3	4	3	6	5	28	82	B. abortus bv1	Cattle	Brazil
2013Minharro#110	2085	SP 5	4	5	4	12	2	2	3	3	6	43	8	3	4	3	5	6	28	82	B. abortus bv1	Cattle	Brazil
2013Minharro#111	2086	SP 6	4	5	4	12	2	2	3	3	6	43	8	3	4	3	3	6	28	82	B. abortus bv1	Cattle	Brazil
2013Minharro#112	2087	SP 7	4	5	4	12	2	2	3	3	6	43	8	3	4	3	5	5	28	82	B. abortus bv1	Cattle	Brazil
2013Minharro#113	2088	SP 8	4	5	4	12	2	2	3	3	6	43	8	3	4	3	5	6	28	82	B. abortus bv1	Cattle	Brazil
2013Minharro#116	2091	Botucatu	4	5	4	12	2	2	3	3	6	43	8	3	4	3	5	5	28	82	B. abortus bv1	Cattle	Brazil	2007
2013Minharro#094	2069	577	4	5	4	12	2	2	3	3	5	43	8	4	4	3	4	6	28	83	B. abortus bv1	Cattle	Brazil	1977
2013Minharro#100	2075	RS 5	4	5	4	12	2	2	3	3	5	43	8	3	5	3	4	5	28	83	B. abortus bv1	Cattle	Brazil	2004
2013Minharro#005	1980	32	4	5	4	12	2	2	3	3	7	43	8	3	4	5	4	5	28	227	B. abortus bv1	Cattle	Brazil	2006
2013Minharro#106	2081	SP 1	4	5	4	12	2	2	3	3	7	43	8	4	5	3	5	5	28	227	B. abortus bv1	Cattle	Brazil
2013Minharro#133	2108	SC4	4	5	4	12	2	2	3	3	6	43	9	4	4	3	5	7	28	235	B. abortus bv2	Cattle	Brazil
2013Minharro#063	2038	202	4	5	4	12	2	2	3	3	6	43	9	3	4	3	3	7	28	235	B. abortus bv1	Cattle	Brazil	2008
2013Minharro#049	2024	181	4	5	4	12	2	2	3	3	6	43	9	3	4	3	5	5	28	235	B. abortus bv2	Cattle	Brazil	2008
2013Minharro#087	2062	15_mar	4	5	4	12	2	2	3	3	6	43	9	4	4	3	5	7	28	235	B. abortus bv1	Cattle	Brazil	2003
2013Minharro#092	2067	32599	4	5	4	12	2	2	3	3	6	43	9	4	5	3	4	5	28	235	B. abortus bv1	Cattle	Brazil	2004
2013Minharro#101	2076	RS 6	4	5	4	12	2	2	3	3	6	43	9	4	4	3	5	4	28	235	B. abortus bv1	Cattle	Brazil	2006
2013Minharro#102	2077	RS 7	4	5	4	12	2	2	3	3	6	43	9	4	4	3	4	6	28	235	B. abortus bv1	Cattle	Brazil	2007
2013Minharro#104	2079	RS 9	4	5	4	12	2	2	3	3	6	43	9	4	4	3	6	4	28	235	B. abortus bv1	Cattle	Brazil	2007
2013Minharro#105	2080	RS 10	4	5	4	12	2	2	3	3	6	43	9	4	5	3	5	5	28	235	B. abortus bv1	Cattle	Brazil
2013Minharro#134	2109	Jr 20	4	5	4	12	2	2	3	3	6	43	9	4	5	3	4	5	28	235	B. abortus bv1	Cattle	Brazil	2008
2013Minharro#081	2056	10_jun	4	5	4	12	2	2	4	3	6	43	9	4	5	3	3	5	152	257	B. abortus bv1	Cattle	Brazil	2006
2013Minharro#028	2003	95	4	5	3	11	2	2	6	3	4	41	10	8	5	4	8	4	166	309	B. abortus bv6	Cattle	Brazil	2007
2013Minharro#064	2039	203	3	5	3	12	2	2	3	3	9	43	3	5	4	3	8	3	40	318	B. abortus bv6	Cattle	Brazil	2008
2013Minharro#037	2012	163	3	5	3	12	2	2	3	1	7	45	8	7	4	3	3	3	167	319	B. abortus bv3	Cattle	Brazil	2008
2013Minharro#024	1999	61	3	5	3	12	2	2	3	3	7	45	7	7	4	3	3	3	40	320	B. abortus bv6	Cattle	Brazil	2005
2013Minharro#137	2112	Jr 05	3	5	4	12	2	2	3	3	7	43	9	8	4	3	3	3	33	321	B. abortus bv1	Cattle	Brazil	2008
2013Minharro#052	2027	188	3	5	3	12	2	2	3	3	7	43	9	13	4	3	3	3	40	322	B. abortus bv3	Cattle	Brazil	2008
2013Minharro#054	2029	190	3	5	3	12	2	2	3	3	7	43	9	13	4	3	3	3	40	322	B. abortus bv6	Cattle	Brazil	2008
2013Minharro#050	2025	182	3	5	3	12	2	2	3	3	7	43	9	13	4	3	3	3	40	322	B. abortus bv3	Cattle	Brazil	2008
2013Minharro#055	2030	192	3	5	3	12	2	2	3	3	7	43	9	13	4	3	3	3	40	322	B. abortus bv3	Cattle	Brazil	2008
2013Minharro#051	2026	187	3	5	3	12	2	2	3	3	7	43	9	13	4	3	3	3	40	322	B. abortus bv3	Cattle	Brazil	2008
2013Minharro#053	2028	189	3	5	3	12	2	2	3	3	7	43	9	4	4	3	3	3	40	322	B. abortus bv3	Cattle	Brazil	2008
2013Minharro#089	2064	17a/02	3	5	3	12	2	2	3	3	7	43	9	7	5	3	3	3	40	322	B. abortus bv6	Cattle	Brazil	2002
2013Minharro#135	2110	Jr 31	3	5	3	12	2	2	3	3	7	43	9	8	4	3	3	4	40	322	B. abortus bv3	Cattle	Brazil	2008
2013Minharro#136	2111	Jr 24	3	5	3	12	2	2	3	3	7	43	9	8	4	3	3	3	40	322	B. abortus bv6	Cattle	Brazil	2008
2013Minharro#001	1976	A1	3	5	3	12	2	2	3	3	7	49	8	9	4	3	3	4	40	323	B. abortus bv3	Cattle	Brazil	2004
2013Minharro#002	1977	A4	3	5	3	12	2	2	3	3	7	49	8	9	4	3	3	8	40	323	B. abortus bv3	Cattle	Brazil	2004
2013Minharro#003	1978	A6	3	5	3	12	2	2	3	3	7	45	8	9	4	7	3	3	40	324	B. abortus bv3	Cattle	Brazil	2004
2013Minharro#036	2011	162	3	5	3	12	2	2	3	3	7	45	8	8	4	3	3	3	40	324	B. abortus bv3	Cattle	Brazil	2008
2013Minharro#038	2013	164	3	5	3	12	2	2	3	3	7	45	8	10	4	3	3	3	40	324	B. abortus bv3	Cattle	Brazil	2008
2013Minharro#039	2014	165	3	5	3	12	2	2	3	3	7	45	8	13	4	3	3	3	40	324	B. abortus bv6	Cattle	Brazil	2008
2013Minharro#035	2010	161	3	5	3	12	2	2	3	3	7	45	8	4	4	3	3	3	40	324	B. abortus bv6	Cattle	Brazil	2008
2013Minharro#073	2048	218	3	5	3	12	2	2	3	3	7	45	8	13	4	3	3	3	40	324	B. abortus bv6	Cattle	Brazil	2008
2013Minharro#072	2047	217	4	4	3	12	2	2	3	3	7	43	8	13	4	3	3	3	168	325	B. abortus bv3	Cattle	Brazil	2008
2013Minharro#108	2083	SP 3	3	5	3	12	2	2	3	3	6	43	8	8	4	3	3	3	40	329	B. abortus bv6		Brazil
2013Minharro#084	2059	13a/02	4	5	4	12	2	2	3	3	6	45	9	4	4	3	4	6	28	333	B. abortus bv1	Cattle	Brazil	2002
2013Minharro#020	1995	49	4	5	4	12	2	2	3	3	6	45	7	3	4	3	6	5	28	334	B. abortus bv2	Cattle	Brazil	2006
2013Minharro#021	1996	50	4	5	4	12	2	2	3	3	6	45	7	3	4	3	5	4	28	334	B. abortus bv2	Cattle	Brazil	2006
2013Minharro#022	1997	54	4	5	4	12	2	2	3	3	6	45	7	3	4	3	5	5	28	334	B. abortus bv2	Cattle	Brazil	2006
2013Minharro#023	1998	55	4	5	4	12	2	2	3	3	6	45	7	3	5	3	4	5	28	334	B. abortus bv2	Cattle	Brazil	2006
2013Minharro#017	1992	45	4	5	4	12	2	2	3	3	7	45	8	7	4	3	4	3	28	335	B. abortus bv1	Cattle	Brazil	2006
2013Minharro#114	2089	SP 9	4	5	4	13	2	2	3	3	6	43	8	3	4	3	6	6	159	336	B. abortus bv1	Cattle	Brazil
2013Minharro#115	2090	SP 10	4	5	4	13	2	2	3	3	6	43	8	3	4	3	6	5	159	336	B. abortus bv1	Cattle	Brazil
2013Minharro#088	2063	16_fev	4	5	4	12	1	2	3	3	6	45	8	1	4	3	4	6	32	337	B. abortus bv4	Cattle	Brazil	2002
GCA_001715385	10050	2002734562	4	5	4	12	2	3	3	3	6	43	8	3	7	3	3	5	27	79	B. abortus	Rodent	California	2005
2018Vergnaud#0236	3406	BCCN#89-116	3	5	4	11	2	2	3	3	6	41	8	7	4	3	7	9	34	63	B. abortus bv3	Cattle	Cameroon	1989
2018Vergnaud#0237	3407	BCCN#90-45	3	5	4	11	2	2	3	3	6	41	8	5	3	3	11	4	34	63	B. abortus bv3	Zebu	Cameroon	1990
2018Vergnaud#0238	3408	BCCN#90-46	3	5	4	11	2	2	3	3	6	41	8	4	13	3	6	5	34	63	B. abortus bv3	Zebu	Cameroon	1990
2018Vergnaud#0290	3460	BCCN#87-56	4	5	4	12	1	2	3	3	6	43	8	1	4	3	5	4	32	182	B. abortus atypical	Cattle	Canada	1987
2006LeFleche#105	105	BCCN#95-55	4	5	4	12	2	2	3	3	6	43	8	3	4	3	3	5	28	82	B. abortus bv1	Cattle	Costa Rica	1995
2017Hern谩ndez-Mora#003	2834	baboCR63	4	5	4	12	2	3	3	3	6	43	8	3	7	3	3	5	27	79	B. abortus	Cattle	Costa Rica	2012
2017Hern谩ndez-Mora#022	2853	baboCR52	4	5	4	12	2	3	3	3	6	43	8	3	4	3	3	5	27	79	B. abortus	Cattle	Costa Rica	2005
2017Hern谩ndez-Mora#055	2886	baboCR64	4	5	4	12	2	3	3	3	6	43	8	3	7	3	3	5	27	79	B. abortus	Cattle	Costa Rica	2012
2017Hern谩ndez-Mora#061	2892	baboCR69A	4	5	4	12	2	3	3	3	6	43	8	7	5	3	3	5	27	79	B. abortus	Cattle	Costa Rica	2014
2017Hern谩ndez-Mora#062	2893	baboCR70A	4	5	4	12	2	3	3	3	6	43	8	7	5	3	3	5	27	79	B. abortus	Cattle	Costa Rica	2014
2017Hern谩ndez-Mora#064	2895	baboCR74	4	5	4	12	2	3	3	3	6	43	8	7	4	3	3	5	27	79	B. abortus	Cattle	Costa Rica	2014
2017Hern谩ndez-Mora#114	2945	baboCR75	4	5	4	12	2	3	3	3	6	43	8	3	4	3	3	5	27	79	B. abortus	Cattle	Costa Rica	2014
2017Hern谩ndez-Mora#115	2946	baboCR76	4	5	4	12	2	3	3	3	6	43	8	3	6	3	3	5	27	79	B. abortus	Cattle	Costa Rica	2014
2017Hern谩ndez-Mora#125	2956	baboCR87	4	5	4	12	2	3	3	3	6	43	8	3	3	3	3	5	27	79	B. abortus	Cattle	Costa Rica	2014
2017Hern谩ndez-Mora#126	2957	baboCR88	4	5	4	12	2	3	3	3	6	43	8	3	5	3	3	5	27	79	B. abortus	Cattle	Costa Rica	2014
2017Hern谩ndez-Mora#127	2958	baboCR89	4	5	4	12	2	3	3	3	6	43	8	3	5	3	3	5	27	79	B. abortus	Cattle	Costa Rica	2015
2017Hern谩ndez-Mora#128	2959	baboCR90	4	5	4	12	2	3	3	3	6	43	8	3	4	3	3	5	27	79	B. abortus	Cattle	Costa Rica	2015
2017Hern谩ndez-Mora#129	2960	baboCR92	4	5	4	12	2	3	3	3	6	43	8	3	3	3	3	5	27	79	B. abortus	Cattle	Costa Rica	2015
2017Hern谩ndez-Mora#008	2839	baboCR31	4	5	4	12	2	2	3	3	6	43	8	3	4	3	3	5	28	82	B. abortus	Cattle	Costa Rica	2004
2017Hern谩ndez-Mora#009	2840	baboCR40	4	5	4	12	2	2	3	3	6	43	8	3	5	3	3	5	28	82	B. abortus	Cattle	Costa Rica	2004
2017Hern谩ndez-Mora#010	2841	baboCR41	4	5	4	12	2	2	3	3	6	43	8	3	5	3	3	5	28	82	B. abortus	Cattle	Costa Rica	2004
2017Hern谩ndez-Mora#011	2842	baboCR42	4	5	4	12	2	2	3	3	6	43	8	3	5	3	3	5	28	82	B. abortus	Cattle	Costa Rica	2004
2017Hern谩ndez-Mora#012	2843	baboCR43	4	5	4	12	2	2	3	3	6	43	8	3	5	3	3	5	28	82	B. abortus	Cattle	Costa Rica	2004
2017Hern谩ndez-Mora#013	2844	baboCR44	4	5	4	12	2	2	3	3	6	43	8	3	4	3	3	5	28	82	B. abortus	Cattle	Costa Rica	2004
2017Hern谩ndez-Mora#014	2845	baboCR45	4	5	4	12	2	2	3	3	6	43	8	3	5	3	3	5	28	82	B. abortus	Cattle	Costa Rica	2004
2017Hern谩ndez-Mora#015	2846	baboCR46	4	5	4	12	2	2	3	3	6	43	8	3	5	3	3	5	28	82	B. abortus	Cattle	Costa Rica	2004
2017Hern谩ndez-Mora#016	2847	baboCR47	4	5	4	12	2	2	3	3	6	43	8	3	5	3	3	5	28	82	B. abortus	Cattle	Costa Rica	2005
2017Hern谩ndez-Mora#017	2848	baboCR48	4	5	4	12	2	2	3	3	6	43	8	4	5	3	3	5	28	82	B. abortus	Cattle	Costa Rica	2005
2017Hern谩ndez-Mora#018	2849	baboCR32	4	5	4	12	2	2	3	3	6	43	8	3	5	3	3	5	28	82	B. abortus	Cattle	Costa Rica	2004
2017Hern谩ndez-Mora#019	2850	baboCR49	4	5	4	12	2	2	3	3	6	43	8	4	5	3	3	5	28	82	B. abortus	Cattle	Costa Rica	2005
2017Hern谩ndez-Mora#020	2851	baboCR50	4	5	4	12	2	2	3	3	6	43	8	4	5	3	3	5	28	82	B. abortus	Cattle	Costa Rica	2005
2017Hern谩ndez-Mora#021	2852	baboCR51	4	5	4	12	2	2	3	3	6	43	8	4	5	3	3	5	28	82	B. abortus	Cattle	Costa Rica	2005
2017Hern谩ndez-Mora#023	2854	baboCR53	4	5	4	12	2	2	3	3	6	43	8	3	5	3	3	5	28	82	B. abortus	Cattle	Costa Rica	2005
2017Hern谩ndez-Mora#024	2855	baboCR54	4	5	4	12	2	2	3	3	6	43	8	3	5	3	3	5	28	82	B. abortus	Cattle	Costa Rica	2005
2017Hern谩ndez-Mora#025	2856	baboCR55	4	5	4	12	2	2	3	3	6	43	8	3	5	3	3	5	28	82	B. abortus	Cattle	Costa Rica	2005
2017Hern谩ndez-Mora#026	2857	baboCR56	4	5	4	12	2	2	3	3	6	43	8	3	5	3	3	5	28	82	B. abortus	Cattle	Costa Rica	2005
2017Hern谩ndez-Mora#029	2860	baboCR33	4	5	4	12	2	2	3	3	6	43	8	3	5	3	3	5	28	82	B. abortus	Cattle	Costa Rica	2004
2017Hern谩ndez-Mora#030	2861	baboCR24	4	5	4	12	2	2	3	3	6	43	8	4	5	3	3	5	28	82	B. abortus	Cattle	Costa Rica	2003
2017Hern谩ndez-Mora#032	2863	baboCR26	4	5	4	12	2	2	3	3	6	43	8	3	5	3	3	5	28	82	B. abortus	Cattle	Costa Rica	2003
2017Hern谩ndez-Mora#040	2871	baboCR34	4	5	4	12	2	2	3	3	6	43	8	3	5	3	3	5	28	82	B. abortus	Cattle	Costa Rica	2004
2017Hern谩ndez-Mora#050	2881	baboCR35	4	5	4	12	2	2	3	3	6	43	8	3	5	3	3	5	28	82	B. abortus	Cattle	Costa Rica	2004
2017Hern谩ndez-Mora#056	2887	baboCR36	4	5	4	12	2	2	3	3	6	43	8	3	5	3	3	5	28	82	B. abortus	Cattle	Costa Rica	2004
2017Hern谩ndez-Mora#057	2888	baboCR37	4	5	4	12	2	2	3	3	6	43	8	3	5	3	3	5	28	82	B. abortus	Cattle	Costa Rica	2004
2017Hern谩ndez-Mora#058	2889	baboCR38	4	5	4	12	2	2	3	3	6	43	8	3	5	3	3	5	28	82	B. abortus	Cattle	Costa Rica	2004
2017Hern谩ndez-Mora#059	2890	baboCR39	4	5	4	12	2	2	3	3	6	43	8	3	5	3	3	5	28	82	B. abortus	Cattle	Costa Rica	2004
2017Hern谩ndez-Mora#060	2891	baboCR68	4	5	4	12	2	2	3	3	6	43	8	4	5	3	3	5	28	82	B. abortus	Cattle	Costa Rica	2003
2017Hern谩ndez-Mora#063	2894	baboCR72	4	5	4	12	2	2	3	3	6	43	8	3	4	3	3	5	28	82	B. abortus	Cattle	Costa Rica	2011
2017Hern谩ndez-Mora#068	2899	baboCR111	4	5	4	12	2	2	3	3	6	43	8	4	3	3	3	5	28	82	B. abortus	Cattle	Costa Rica	2015
2017Hern谩ndez-Mora#069	2900	baboCR112	4	5	4	12	2	2	3	3	6	43	8	5	5	3	3	5	28	82	B. abortus	Cattle	Costa Rica	2015
2017Hern谩ndez-Mora#070	2901	baboCR113	4	5	4	12	2	2	3	3	6	43	8	8	5	3	3	5	28	82	B. abortus	Cattle	Costa Rica	2015
2017Hern谩ndez-Mora#072	2903	baboCR115	4	5	4	12	2	2	3	3	6	43	8	3	5	3	3	5	28	82	B. abortus	Cattle	Costa Rica	2015
2017Hern谩ndez-Mora#073	2904	baboCR117	4	5	4	12	2	2	3	3	6	43	8	7	5	3	3	5	28	82	B. abortus	Cattle	Costa Rica	2015
2017Hern谩ndez-Mora#079	2910	baboCR124	4	5	4	12	2	2	3	3	6	43	8	3	5	3	3	5	28	82	B. abortus	Cattle	Costa Rica	2015
2017Hern谩ndez-Mora#080	2911	baboCR125	4	5	4	12	2	2	3	3	6	43	8	8	5	3	3	5	28	82	B. abortus	Cattle	Costa Rica	2015
2017Hern谩ndez-Mora#081	2912	baboCR126	4	5	4	12	2	2	3	3	6	43	8	3	3	3	3	5	28	82	B. abortus	Cattle	Costa Rica	2015
2017Hern谩ndez-Mora#082	2913	baboCR127	4	5	4	12	2	2	3	3	6	43	8	3	5	3	3	5	28	82	B. abortus	Cattle	Costa Rica	2016
2017Hern谩ndez-Mora#083	2914	baboCR128	4	5	4	12	2	2	3	3	6	43	8	3	5	3	3	5	28	82	B. abortus	Cattle	Costa Rica	2016
2017Hern谩ndez-Mora#084	2915	baboCR129	4	5	4	12	2	2	3	3	6	43	8	3	5	3	3	5	28	82	B. abortus	Cattle	Costa Rica	2016
2017Hern谩ndez-Mora#085	2916	baboCR130	4	5	4	12	2	2	3	3	6	43	8	3	5	3	3	5	28	82	B. abortus	Cattle	Costa Rica	2016
2017Hern谩ndez-Mora#086	2917	baboCR131	4	5	4	12	2	2	3	3	6	43	8	3	5	3	3	5	28	82	B. abortus	Cattle	Costa Rica	2016
2017Hern谩ndez-Mora#087	2918	baboCR132	4	5	4	12	2	2	3	3	6	43	8	3	5	3	3	5	28	82	B. abortus	Cattle	Costa Rica	2016
2017Hern谩ndez-Mora#088	2919	baboCR133	4	5	4	12	2	2	3	3	6	43	8	3	5	3	3	5	28	82	B. abortus	Cattle	Costa Rica	2016
2017Hern谩ndez-Mora#089	2920	baboCR134	4	5	4	12	2	2	3	3	6	43	8	3	5	3	3	5	28	82	B. abortus	Cattle	Costa Rica	2016
2017Hern谩ndez-Mora#090	2921	baboCR135	4	5	4	12	2	2	3	3	6	43	8	3	5	3	3	5	28	82	B. abortus	Cattle	Costa Rica	2016
2017Hern谩ndez-Mora#091	2922	baboCR137	4	5	4	12	2	2	3	3	6	43	8	4	4	3	3	5	28	82	B. abortus	Cattle	Costa Rica	2016
2017Hern谩ndez-Mora#092	2923	baboCR139	4	5	4	12	2	2	3	3	6	43	8	4	4	3	3	5	28	82	B. abortus	Cattle	Costa Rica	2016
2017Hern谩ndez-Mora#093	2924	baboCR140	4	5	4	12	2	2	3	3	6	43	8	6	5	3	3	6	28	82	B. abortus	Cattle	Costa Rica	2016
2017Hern谩ndez-Mora#094	2925	baboCR141	4	5	4	12	2	2	3	3	6	43	8	3	5	3	3	6	28	82	B. abortus	Cattle	Costa Rica	2016
2017Hern谩ndez-Mora#095	2926	baboCR142	4	5	4	12	2	2	3	3	6	43	8	3	5	3	3	6	28	82	B. abortus	Cattle	Costa Rica	2016
2017Hern谩ndez-Mora#096	2927	baboCR143	4	5	4	12	2	2	3	3	6	43	8	4	4	3	3	6	28	82	B. abortus	Cattle	Costa Rica	2016
2017Hern谩ndez-Mora#098	2929	baboCR146	4	5	4	12	2	2	3	3	6	43	8	4	3	3	3	5	28	82	B. abortus	Cattle	Costa Rica	2016
2017Hern谩ndez-Mora#099	2930	baboCR147	4	5	4	12	2	2	3	3	6	43	8	4	3	3	3	5	28	82	B. abortus	Cattle	Costa Rica	2016
2017Hern谩ndez-Mora#100	2931	baboCR148	4	5	4	12	2	2	3	3	6	43	8	4	3	3	3	5	28	82	B. abortus	Cattle	Costa Rica	2016
2017Hern谩ndez-Mora#101	2932	baboCR149	4	5	4	12	2	2	3	3	6	43	8	4	3	3	3	5	28	82	B. abortus	Cattle	Costa Rica	2016
2017Hern谩ndez-Mora#102	2933	baboCR150	4	5	4	12	2	2	3	3	6	43	8	4	3	3	3	5	28	82	B. abortus	Cattle	Costa Rica	2016
2017Hern谩ndez-Mora#103	2934	baboCR157	4	5	4	12	2	2	3	3	6	43	8	3	3	3	3	5	28	82	B. abortus	Cattle	Costa Rica	2015
2017Hern谩ndez-Mora#104	2935	baboCR158	4	5	4	12	2	2	3	3	6	43	8	3	4	3	3	6	28	82	B. abortus	Cattle	Costa Rica	2015
2017Hern谩ndez-Mora#105	2936	baboCR159	4	5	4	12	2	2	3	3	6	43	8	3	4	3	3	6	28	82	B. abortus	Cattle	Costa Rica	2015
2017Hern谩ndez-Mora#106	2937	baboCR160	4	5	4	12	2	2	3	3	6	43	8	6	5	3	3	6	28	82	B. abortus	Cattle	Costa Rica	2016
2017Hern谩ndez-Mora#107	2938	baboCR161	4	5	4	12	2	2	3	3	6	43	8	7	5	3	3	5	28	82	B. abortus	Cattle	Costa Rica	2016
2017Hern谩ndez-Mora#108	2939	baboCR162	4	5	4	12	2	2	3	3	6	43	8	4	3	3	3	5	28	82	B. abortus	Cattle	Costa Rica	2016
2017Hern谩ndez-Mora#110	2941	baboCR164	4	5	4	12	2	2	3	3	6	43	8	4	3	3	3	5	28	82	B. abortus	Cattle	Costa Rica	2016
2017Hern谩ndez-Mora#111	2942	baboCR165	4	5	4	12	2	2	3	3	6	43	8	6	5	3	3	6	28	82	B. abortus	Cattle	Costa Rica	2016
2017Hern谩ndez-Mora#112	2943	baboCR166	4	5	4	12	2	2	3	3	6	43	8	3	5	3	3	6	28	82	B. abortus	Cattle	Costa Rica	2015
2017Hern谩ndez-Mora#113	2944	baboCR167	4	5	4	12	2	2	3	3	6	43	8	4	4	3	3	5	28	82	B. abortus	Cattle	Costa Rica	2015
2017Hern谩ndez-Mora#130	2961	baboCR93	4	5	4	12	2	2	3	3	6	43	8	4	3	3	3	5	28	82	B. abortus	Cattle	Costa Rica	2015
2017Hern谩ndez-Mora#137	2968	baboCR106	4	5	4	12	2	2	3	3	6	43	8	5	5	3	3	5	28	82	B. abortus	Cattle	Costa Rica	2015
2017Hern谩ndez-Mora#138	2969	baboCR107	4	5	4	12	2	2	3	3	6	43	8	7	5	3	3	5	28	82	B. abortus	Cattle	Costa Rica	2015
2017Hern谩ndez-Mora#139	2970	baboCR108	4	5	4	12	2	2	3	3	6	43	8	5	5	3	3	5	28	82	B. abortus	Cattle	Costa Rica	2015
2017Hern谩ndez-Mora#140	2971	baboCR109	4	5	4	12	2	2	3	3	6	43	8	4	3	3	3	5	28	82	B. abortus	Cattle	Costa Rica	2015
2017Hern谩ndez-Mora#141	2972	baboCR110	4	5	4	12	2	2	3	3	6	43	8	4	3	3	3	5	28	82	B. abortus	Cattle	Costa Rica	2015
2017Hern谩ndez-Mora#142	2973	baboCR116	4	5	4	12	2	2	3	3	6	43	8	3	5	3	3	5	28	82	B. abortus	Cattle	Costa Rica	2015
2017Hern谩ndez-Mora#143	2974	baboCR136	4	5	4	12	2	2	3	3	6	43	8	3	5	3	3	5	28	82	B. abortus	Cattle	Costa Rica	2016
2017Hern谩ndez-Mora#144	2975	baboCR151	4	5	4	12	2	2	3	3	6	43	8	4	3	3	3	5	28	82	B. abortus	Cattle	Costa Rica	2016
2017Hern谩ndez-Mora#071	2902	baboCR114	4	5	4	12	2	2	3	3	5	43	8	4	3	3	3	5	28	83	B. abortus	Cattle	Costa Rica	2015
2017Hern谩ndez-Mora#065	2896	baboCR96	4	5	3	12	2	2	3	3	6	43	8	3	5	3	3	5	112	210	B. abortus	Cattle	Costa Rica	2015
2017Hern谩ndez-Mora#066	2897	baboCR100	4	5	3	12	2	2	3	3	6	43	8	3	5	3	3	5	112	210	B. abortus	Cattle	Costa Rica	2015
2017Hern谩ndez-Mora#074	2905	baboCR118	4	5	3	12	2	2	3	3	6	43	8	3	5	3	3	5	112	210	B. abortus	Cattle	Costa Rica	2015
2017Hern谩ndez-Mora#075	2906	baboCR119	4	5	3	12	2	2	3	3	6	43	8	3	5	3	3	5	112	210	B. abortus	Cattle	Costa Rica	2015
2017Hern谩ndez-Mora#076	2907	baboCR121	4	5	3	12	2	2	3	3	6	43	8	3	5	3	3	5	112	210	B. abortus	Cattle	Costa Rica	2015
2017Hern谩ndez-Mora#077	2908	baboCR122	4	5	3	12	2	2	3	3	6	43	8	3	5	3	3	5	112	210	B. abortus	Cattle	Costa Rica	2015
2017Hern谩ndez-Mora#078	2909	baboCR123	4	5	3	12	2	2	3	3	6	43	8	3	5	3	3	5	112	210	B. abortus	Cattle	Costa Rica	2015
2017Hern谩ndez-Mora#097	2928	baboCR144	4	5	3	12	2	2	3	3	6	43	8	3	5	3	3	5	112	210	B. abortus	Cattle	Costa Rica	2016
2017Hern谩ndez-Mora#117	2948	baboCR77B	4	5	3	12	2	2	3	3	6	43	8	3	5	3	3	5	112	210	B. abortus	Cattle	Costa Rica	2014
2017Hern谩ndez-Mora#118	2949	baboCR78B	4	5	3	12	2	2	3	3	6	43	8	3	5	3	3	5	112	210	B. abortus	Cattle	Costa Rica	2014
2017Hern谩ndez-Mora#119	2950	baboCR79B	4	5	3	12	2	2	3	3	6	43	8	3	5	3	3	5	112	210	B. abortus	Cattle	Costa Rica	2014
2017Hern谩ndez-Mora#120	2951	baboCR80B	4	5	3	12	2	2	3	3	6	43	8	3	5	3	3	5	112	210	B. abortus	Cattle	Costa Rica	2014
2017Hern谩ndez-Mora#121	2952	baboCR81	4	5	3	12	2	2	3	3	6	43	8	3	5	3	3	5	112	210	B. abortus	Cattle	Costa Rica	2014
2017Hern谩ndez-Mora#122	2953	baboCR82	4	5	3	12	2	2	3	3	6	43	8	3	5	3	3	5	112	210	B. abortus	Cattle	Costa Rica	2014
2017Hern谩ndez-Mora#123	2954	baboCR83	4	5	3	12	2	2	3	3	6	43	8	3	5	3	3	5	112	210	B. abortus	Cattle	Costa Rica	2014
2017Hern谩ndez-Mora#124	2955	baboCR86	4	5	3	12	2	2	3	3	6	43	8	3	5	3	3	5	112	210	B. abortus	Cattle	Costa Rica	2014
2017Hern谩ndez-Mora#132	2963	baboCR97	4	5	3	12	2	2	3	3	6	43	8	3	5	3	3	5	112	210	B. abortus	Cattle	Costa Rica	2015
2017Hern谩ndez-Mora#133	2964	baboCR98	4	5	3	12	2	2	3	3	6	43	8	3	5	3	3	5	112	210	B. abortus	Cattle	Costa Rica	2015
2017Hern谩ndez-Mora#136	2967	baboCR104	4	5	3	12	2	2	3	3	6	43	8	3	5	3	3	5	112	210	B. abortus	Cattle	Costa Rica	2015
2017Hern谩ndez-Mora#001	2832	baboCR11	4	5	4	12	2	1	3	3	6	42	8	3	4	3	3	5	29	370	B. abortus	Cattle	Costa Rica	2003
2017Hern谩ndez-Mora#002	2833	baboCR4	4	5	4	12	2	1	3	3	6	42	8	3	4	3	3	5	29	370	B. abortus	Cattle	Costa Rica	2003
2017Hern谩ndez-Mora#027	2858	baboCR22	4	5	4	12	2	1	3	3	6	42	8	3	4	3	3	5	29	370	B. abortus	Cattle	Costa Rica	2003
2017Hern谩ndez-Mora#033	2864	baboCR27	4	5	4	12	2	1	3	3	6	42	8	3	4	3	3	5	29	370	B. abortus	Cattle	Costa Rica	2003
2017Hern谩ndez-Mora#036	2867	baboCR30	4	5	4	12	2	1	3	3	6	42	8	3	4	3	3	5	29	370	B. abortus	Cattle	Costa Rica	2003
2017Hern谩ndez-Mora#043	2874	baboCR18	4	5	4	12	2	1	3	3	6	42	8	3	4	3	3	5	29	370	B. abortus	Cattle	Costa Rica	2003
2017Hern谩ndez-Mora#044	2875	baboCR10	4	5	4	12	2	1	3	3	6	42	8	3	5	3	3	5	29	370	B. abortus	Cattle	Costa Rica	2003
2017Hern谩ndez-Mora#045	2876	baboCR7	4	5	4	12	2	1	3	3	6	42	8	3	4	3	3	5	29	370	B. abortus	Cattle	Costa Rica	2003
2017Hern谩ndez-Mora#048	2879	baboCR12	4	5	4	12	2	1	3	3	6	42	8	3	4	3	3	5	29	370	B. abortus	Cattle	Costa Rica	2003
2017Hern谩ndez-Mora#049	2880	baboCR5	4	5	4	12	2	1	3	3	6	42	8	3	4	3	3	5	29	370	B. abortus	Cattle	Costa Rica	2003
2017Hern谩ndez-Mora#051	2882	baboCR15	4	5	4	12	2	1	3	3	6	42	8	3	4	3	3	5	29	370	B. abortus	Cattle	Costa Rica	2003
2017Hern谩ndez-Mora#052	2883	baboCR13	4	5	4	12	2	1	3	3	6	42	8	3	4	3	3	5	29	370	B. abortus	Cattle	Costa Rica	2003
2017Hern谩ndez-Mora#053	2884	baboCR14	4	5	4	12	2	1	3	3	6	42	8	3	4	3	3	5	29	370	B. abortus	Cattle	Costa Rica	2003
2017Hern谩ndez-Mora#054	2885	baboCR17	4	5	4	12	2	1	3	3	6	42	8	3	4	3	3	5	29	370	B. abortus	Cattle	Costa Rica	2003
2017Hern谩ndez-Mora#005	2836	baboCR60	4	5	4	12	2	3	3	3	6	42	8	6	5	3	3	6	27	371	B. abortus	Cattle	Costa Rica	2011
2017Hern谩ndez-Mora#006	2837	baboCR59	4	5	4	12	2	3	3	3	6	42	8	6	5	3	3	6	27	371	B. abortus	Cattle	Costa Rica	2010
2017Hern谩ndez-Mora#028	2859	baboCR23	4	5	4	12	2	3	3	3	6	42	8	3	7	3	3	5	27	371	B. abortus	Cattle	Costa Rica	2003
2017Hern谩ndez-Mora#031	2862	baboCR25	4	5	4	12	2	3	3	3	6	42	8	3	7	3	3	5	27	371	B. abortus	Cattle	Costa Rica	2003
2017Hern谩ndez-Mora#035	2866	baboCR29	4	5	4	12	2	3	3	3	6	42	8	3	7	3	3	5	27	371	B. abortus	Cattle	Costa Rica	2003
2017Hern谩ndez-Mora#038	2869	baboCR16	4	5	4	12	2	3	3	3	6	42	8	3	7	3	3	5	27	371	B. abortus	Cattle	Costa Rica	2003
2017Hern谩ndez-Mora#039	2870	baboCR8	4	5	4	12	2	3	3	3	6	42	8	3	7	3	3	5	27	371	B. abortus	Cattle	Costa Rica	2003
2017Hern谩ndez-Mora#042	2873	baboCR6	4	5	4	12	2	3	3	3	6	42	8	3	7	3	3	5	27	371	B. abortus	Cattle	Costa Rica	2003
2017Hern谩ndez-Mora#046	2877	baboCR19	4	5	4	12	2	3	3	3	6	42	8	3	7	3	3	5	27	371	B. abortus	Cattle	Costa Rica	2003
2017Hern谩ndez-Mora#004	2835	baboCR58	4	5	4	12	2	3	3	3	6	41	8	3	7	3	3	5	27	372	B. abortus	Cattle	Costa Rica	2010
2017Hern谩ndez-Mora#007	2838	baboCR57	4	5	4	12	2	3	3	3	6	41	8	3	7	3	3	5	27	372	B. abortus	Cattle	Costa Rica	2010
2017Hern谩ndez-Mora#047	2878	baboCR20	4	5	4	12	2	3	3	3	5	42	8	3	6	3	3	6	27	373	B. abortus	Cattle	Costa Rica	2003
2017Hern谩ndez-Mora#034	2865	baboCR28	4	5	4	11	2	3	3	3	5	42	8	3	6	3	3	6	192	381	B. abortus	Cattle	Costa Rica	2003
2017Hern谩ndez-Mora#037	2868	baboCR9	4	5	4	11	2	3	3	3	5	42	8	3	6	3	3	6	192	381	B. abortus	Cattle	Costa Rica	2003
2017Hern谩ndez-Mora#041	2872	baboCR1	4	5	4	11	2	3	3	3	5	40	8	3	6	3	3	6	192	382	B. abortus	Cattle	Costa Rica	2003
2017Hern谩ndez-Mora#067	2898	baboCR105	4	5	3	12	2	3	3	3	6	43	8	3	5	3	3	5	191	383	B. abortus	Cattle	Costa Rica	2015
2017Hern谩ndez-Mora#109	2940	baboCR163	4	5	3	12	2	3	3	3	6	43	8	3	5	3	3	5	191	383	B. abortus	Cattle	Costa Rica	2016
2017Hern谩ndez-Mora#116	2947	baboCR84	4	5	3	12	2	3	3	3	6	43	8	3	5	3	3	5	191	383	B. abortus	Cattle	Costa Rica	2014
2017Hern谩ndez-Mora#131	2962	baboCR94	4	5	3	12	2	3	3	3	6	43	8	3	5	3	3	5	191	383	B. abortus	Cattle	Costa Rica	2015
2017Hern谩ndez-Mora#134	2965	baboCR101	4	5	3	12	2	3	3	3	6	43	8	3	5	3	3	5	191	383	B. abortus	Cattle	Costa Rica	2015
2017Hern谩ndez-Mora#135	2966	baboCR103	4	5	3	12	2	3	3	3	6	43	8	3	5	3	3	5	191	383	B. abortus	Cattle	Costa Rica	2015
2017Hern谩ndez-Mora#145	2976	baboCR154	4	5	3	12	2	3	3	3	6	43	8	3	5	3	3	5	191	383	B. abortus	Cattle	Costa Rica	2016
2017Hern谩ndez-Mora#146	2977	baboCR155	4	5	3	12	2	3	3	3	6	43	8	3	5	3	3	5	191	383	B. abortus	Cattle	Costa Rica	2016
2017Hern谩ndez-Mora#147	2978	baboCR156	4	5	3	12	2	3	3	3	6	43	8	3	5	3	3	5	191	383	B. abortus	Cattle	Costa Rica	2016
2006LeFleche#006	6	REF B3196	3	5	3	12	2	2	2	3	7	43	8	6	7	3	3	3	39	67	B. abortus bv5	Cattle	England
2009Her#005	411	KRef05	3	5	3	12	2	2	2	3	7	43	8	6	7	3	3	3	39	67	B. abortus bv5	Cattle	England
2006LeFleche#007	7	REF C68	3	5	3	12	2	2	2	3	7	43	8	6	6	3	3	3	39	67	B. abortus bv9	Cattle	England
2009Her#007	413	KRef08	3	5	3	12	2	2	2	3	7	43	8	6	6	3	3	3	39	67	B. abortus bv9	Cattle	England
2006LeFleche#005	5	REF 292	4	5	4	12	2	2	3	2	6	43	8	3	4	3	3	5	30	78	B. abortus bv4	Cattle	England
2009Her#004	410	KRef04	4	5	4	12	2	2	3	2	6	43	8	3	4	3	3	5	30	78	B. abortus bv4	Cattle	England
2006LeFleche#003	3	REF 86/8/59	4	5	4	12	2	1	3	3	6	43	8	3	4	3	3	5	29	80	B. abortus bv2	Cattle	England
2009Her#002	408	KRef02	4	5	4	12	2	1	3	3	6	43	8	3	4	3	3	5	29	80	B. abortus bv2	Cattle	England
2006LeFleche#002	2	REF 544	4	5	4	12	2	2	3	3	5	43	8	3	5	3	4	5	28	83	B. abortus bv1	Cattle	England
2009Her#001	407	KRef01	4	5	4	12	2	2	3	3	5	43	8	3	5	3	4	5	28	83	B. abortus bv1	Cattle	England
2018Vergnaud#0110	3280	BCCN#77-79A	3	5	3	12	2	2	3	3	7	43	8	5	4	3	3	3	40	66	B. abortus atypical	Human	France	1977
2006LeFleche#118	118	BCCN#87-46	3	5	3	12	2	2	2	3	7	43	8	4	6	3	3	3	39	67	B. abortus bv9	Cattle	France	1987
2006LeFleche#109	109	BCCN#92-25	4	5	3	12	2	2	3	1	6	43	8	4	5	5	4	3	36	72	B. abortus bv3	Cattle	France	1992
2006LeFleche#112	112	BCCN#94-18	4	5	3	12	2	2	3	1	6	43	8	4	5	7	3	3	36	72	B. abortus bv3	Cattle	France	1994
2006LeFleche#113	113	BCCN#94-19	4	5	3	12	2	2	3	1	6	43	8	4	5	7	3	3	36	72	B. abortus bv3	Cattle	France	1994
2006LeFleche#114	114	BCCN#95-7	4	5	3	12	2	2	3	1	6	43	8	4	5	5	3	3	36	72	B. abortus bv3	Cattle	France	1995
2018Vergnaud#0736	3906	BCCN#87-15	4	5	3	12	2	2	3	1	6	43	8	5	5	5	3	3	36	72	B. abortus bv3	Cattle	France	1987
2006LeFleche#102	102	BCCN#95-11	3	5	4	12	2	2	3	3	6	43	8	5	7	3	4	4	33	76	B. abortus bv1	Cattle	France	1995
2006LeFleche#101	101	BCCN#92-73	3	5	4	12	2	2	3	3	6	43	8	5	6	3	4	4	33	76	B. abortus bv1	Cattle	France	1992
2006LeFleche#103	103	BCCN#95-19	4	5	4	12	2	2	3	3	6	43	8	4	4	3	3	4	28	82	B. abortus bv1	Chamois	France	1995
2018Vergnaud#0249	3419	BCCN#82-98A	4	5	4	12	1	1	3	3	6	43	8	2	5	3	4	4	133	245	B. abortus atypical	Cattle	France	1982
2018Vergnaud#0250	3420	BCCN#82-98B	4	5	4	12	1	1	3	3	6	43	8	2	5	3	4	4	133	245	B. abortus atypical	Cattle	France	1982
2018Vergnaud#0251	3421	BCCN#83-36error	2	5	8	13	1	2	3	2	4	41	8	6	4	3	5	4	131	277	B. abortus bv1_error	Cattle_?	France	1983_?
2006LeFleche#142	142	BfR 106	4	5	3	12	2	2	3	1	7	43	8	4	6	6	4	3	36	70	B. abortus bv3	Cattle	Germany	1998
2006LeFleche#143	143	BfR 107	4	5	3	12	2	2	3	1	7	43	8	4	5	7	4	3	36	70	B. abortus bv3	unknown	Germany	1998
2006LeFleche#141	141	BfR 101	4	5	3	12	2	2	3	1	7	43	8	4	5	6	4	3	36	70	B. abortus bv3	Cattle	Germany	1998
2018Vergnaud#0112	3282	BCCN#R26	4	5	3	12	2	2	3	1	6	43	8	4	5	5	3	3	36	72	B. abortus atypical	Cattle	Germany
2006LeFleche#140	140	BfR 100	4	5	4	12	1	2	3	3	6	43	6	5	4	3	4	5	32	73	B. abortus bv1	unknown	Germany	1972
2006LeFleche#138	138	BfR 98	4	5	4	12	2	2	3	3	6	43	8	5	4	3	6	4	28	82	B. abortus bv1	unknown	Germany	1972
2006LeFleche#108	108	BCCN#91-90	4	5	3	12	2	2	3	1	6	43	8	4	5	4	3	3	36	72	B. abortus bv3	Cattle	Greece	1991
2018Vergnaud#0205	3375	BCCN#92-104	3	5	4	11	2	2	3	3	7	41	8	6	9	3	6	7	34	317	B. abortus bv3	Cattle	Guinea	1992
2018Vergnaud#0245	3415	BCCN#92-105	3	5	4	11	2	2	3	3	7	41	8	6	9	3	6	7	34	317	B. abortus bv3	Cattle	Guinea	1992
2018Vergnaud#0239	3409	BCCN#82-39	3	5	4	11	2	2	3	3	7	41	8	5	4	3	8	7	34	317	B. abortus bv3	Cattle	Guinea-Bissau	1982
2018Vergnaud#0240	3410	BCCN#82-40	3	5	4	11	2	2	3	3	7	41	8	5	4	3	8	7	34	317	B. abortus bv3	Cattle	Guinea-Bissau	1982
2018Vergnaud#0241	3411	BCCN#82-41	3	5	4	11	2	2	3	3	7	41	8	5	4	3	8	7	34	317	B. abortus bv3	Cattle	Guinea-Bissau	1982
2018Vergnaud#0242	3412	BCCN#82-42	3	5	4	11	2	2	3	3	7	41	8	5	4	3	8	8	34	317	B. abortus bv3	Cattle	Guinea-Bissau	1982
2018Vergnaud#0243	3413	BCCN#82-43	3	5	4	11	2	2	3	3	7	41	8	5	4	3	7	7	34	317	B. abortus bv3	Cattle	Guinea-Bissau	1982
2018Vergnaud#0244	3414	BCCN#82-44	3	5	4	11	2	2	3	3	7	41	8	5	4	3	6	7	34	317	B. abortus bv3	Cattle	Guinea-Bissau	1982
GCA_000054005	10010	REF 2308	4	5	4	12	2	3	3	3	6	43	8	3	7	3	3	5	27	79	B. abortus bv1	Human	India	2005
2018Vergnaud#0226	3396	BCCN#02-29	4	5	4	12	2	2	3	3	6	43	8	3	3	3	3	5	28	82	B. abortus bv1	Buffalo	India	2002
2018Vergnaud#0227	3397	BCCN#02-45	4	5	4	12	2	2	3	3	6	43	8	3	4	3	3	6	28	82	B. abortus Rough	Buffalo	India	2002
2013Garofolo_1114	1600	1114	4	5	3	12	2	2	3	1	6	43	8	4	5	6	4	3	36	72	B. abortus bv3	Cattle	Italy	2011
2013Garofolo_1115	1601	1115	4	5	3	12	2	2	3	1	6	43	8	4	5	6	4	3	36	72	B. abortus bv3	Cattle	Italy	2011
2013Garofolo_1565	1674	1565	4	5	3	12	2	2	3	1	6	43	8	4	5	6	4	3	36	72	B. abortus bv3	Cattle	Italy	2011
2013Garofolo_1567	1675	1567	4	5	3	12	2	2	3	1	6	43	8	4	3	3	4	3	36	72	B. abortus bv3	Cattle	Italy	2011
2013Garofolo_2081	1698	2081	4	5	3	12	2	2	3	1	6	43	8	4	5	6	4	3	36	72	B. abortus bv3	Cattle	Italy	2011
2013Garofolo_2873	1719	2873	4	5	3	12	2	2	3	1	6	43	8	4	5	6	4	3	36	72	B. abortus bv3	Cattle	Italy	2011
2013Garofolo_6861	1778	6861	4	5	3	12	2	2	3	1	6	43	8	4	6	6	3	3	36	72	B. abortus bv3	Cattle	Italy	2011
2013Garofolo_22839	1709	22839	4	5	3	12	2	2	3	1	6	43	8	4	6	7	3	3	36	72	B. abortus bv3	Buffalo	Italy	2011
2013Garofolo_9263	1805	9263	4	5	3	12	2	2	3	1	6	43	8	5	6	7	3	3	36	72	B. abortus bv3	Buffalo	Italy	2011
2013Garofolo_4360	1733	4360	4	5	3	12	2	2	3	1	6	43	8	4	6	7	5	3	36	72	B. abortus bv3	Cattle	Italy	2011
2013Garofolo_6904	1785	6904	4	5	3	12	2	2	3	1	6	43	8	4	5	6	4	3	36	72	B. abortus bv3	Cattle	Italy	2011
2013Garofolo_5585	1754	5585	4	5	3	12	2	2	3	1	6	43	8	4	5	7	5	3	36	72	B. abortus bv3	Cattle	Italy	2011
2013Garofolo_15081	1671	15081	4	5	3	12	2	2	3	1	6	43	8	4	5	6	5	3	36	72	B. abortus bv3	Cattle	Italy	2011
2013Garofolo_6902	1783	6902	4	5	3	12	2	2	3	1	6	43	8	5	5	6	4	3	36	72	B. abortus bv3	Cattle	Italy	2011
2013Garofolo_8055	1792	8055	4	5	3	12	2	2	3	1	6	43	8	4	6	6	3	3	36	72	B. abortus bv3	Cattle	Italy	2011
2013Garofolo_12368	1638	12368	4	5	3	12	2	2	3	1	6	43	8	4	5	7	5	3	36	72	B. abortus bv3	Cattle	Italy	2011
2013Garofolo_12855	1649	12855	4	5	3	12	2	2	3	1	6	43	8	5	5	6	4	3	36	72	B. abortus bv3	Cattle	Italy	2011
2013Garofolo_17473	1678	17473	4	5	3	12	2	2	3	1	6	43	8	4	5	7	5	3	36	72	B. abortus bv3	Cattle	Italy	2011
2013Garofolo_19433	1688	19433	4	5	3	12	2	2	3	1	6	43	8	4	5	6	5	3	36	72	B. abortus bv3	Cattle	Italy	2011
2013Garofolo_2686	1717	2686	4	5	3	12	2	2	3	1	6	43	8	4	6	8	3	3	36	72	B. abortus bv3	Cattle	Italy	2011
2013Garofolo_6053	1758	6053	4	5	3	12	2	2	3	1	6	43	8	4	5	7	5	3	36	72	B. abortus bv3	Cattle	Italy	2011
2013Garofolo_6901	1782	6901	4	5	3	12	2	2	3	1	6	43	8	4	5	8	5	3	36	72	B. abortus bv3	Cattle	Italy	2011
2013Garofolo_6905	1786	6905	4	5	3	12	2	2	3	1	6	43	8	5	5	6	4	3	36	72	B. abortus bv3	Cattle	Italy	2011
2013Garofolo_9061	1802	9061	4	5	3	12	2	2	3	1	6	43	8	4	5	8	5	3	36	72	B. abortus bv3	Cattle	Italy	2011
2013Garofolo_13544	1656	13544	4	5	3	12	2	2	3	1	6	43	8	3	6	9	3	3	36	72	B. abortus bv3	Ovine	Italy	2011
2013Garofolo_2683	1715	2683	4	5	3	12	2	2	3	1	6	43	8	4	6	8	3	3	36	72	B. abortus bv3	Buffalo	Italy	2011
2013Garofolo_3634	1725	3634	4	5	3	12	2	2	3	1	6	43	8	4	6	8	3	3	36	72	B. abortus bv3	Buffalo	Italy	2011
2013Garofolo_5359	1750	5359	4	5	3	12	2	2	3	1	6	43	8	4	6	8	3	3	36	72	B. abortus bv3	Buffalo	Italy	2011
2013Garofolo_5360	1751	5360	4	5	3	12	2	2	3	1	6	43	8	4	6	8	3	3	36	72	B. abortus bv3	Buffalo	Italy	2011
2013Garofolo_6054	1759	6054	4	5	3	12	2	2	3	1	6	43	8	4	5	7	5	3	36	72	B. abortus bv3	Cattle	Italy	2011
2013Garofolo_1365	1662	1365	4	5	3	12	2	2	3	1	6	43	8	4	5	6	4	3	36	72	B. abortus bv3	Cattle	Italy	2011
2013Garofolo_6899	1780	6899	4	5	3	12	2	2	3	1	6	43	8	4	5	6	4	3	36	72	B. abortus bv3	Cattle	Italy	2011
2013Garofolo_18936	1683	18936	4	5	3	12	2	2	3	1	6	43	8	6	6	5	4	3	36	72	B. abortus bv3	Cattle	Italy	2011
2013Garofolo_11393	1602	11393	4	5	3	12	2	2	3	1	6	43	8	4	5	6	5	3	36	72	B. abortus bv3	Cattle	Italy	2011
2013Garofolo_11813	1624	11813	4	5	3	12	2	2	3	1	6	43	8	3	5	6	3	3	36	72	B. abortus bv3	Cattle	Italy	2011
2013Garofolo_12183	1635	12183	4	5	3	12	2	2	3	1	6	43	8	4	6	7	3	3	36	72	B. abortus bv3	Cattle	Italy	2011
2013Garofolo_2685	1716	2685	4	5	3	12	2	2	3	1	6	43	8	4	6	8	3	3	36	72	B. abortus bv3	Buffalo	Italy	2011
2013Garofolo_3273	1724	3273	4	5	3	12	2	2	3	1	6	43	8	4	6	8	3	2	36	72	B. abortus bv3	Cattle	Italy	2011
2013Garofolo_4363	1734	4363	4	5	3	12	2	2	3	1	6	43	8	4	6	7	3	3	36	72	B. abortus bv3	Cattle	Italy	2011
2013Garofolo_20826	1701	20826	4	5	3	12	2	2	3	1	6	43	8	4	5	7	6	3	36	72	B. abortus bv3	Cattle	Italy	2011
2013Garofolo_1161	1604	1161	4	5	3	12	2	2	3	1	6	43	8	5	5	5	4	3	36	72	B. abortus bv3	Cattle	Italy	2011
2013Garofolo_21571	1703	21571	4	5	3	12	2	2	3	1	6	43	8	4	6	7	3	3	36	72	B. abortus bv3	Cattle	Italy	2011
2013Garofolo_21675	1704	21675	4	5	3	12	2	2	3	1	6	43	8	4	6	7	3	3	36	72	B. abortus bv3	Cattle	Italy	2011
2013Garofolo_3636	1726	3636	4	5	3	12	2	2	3	1	6	43	8	4	6	7	3	3	36	72	B. abortus bv3	Cattle	Italy	2011
2013Garofolo_3916	1729	3916	4	5	3	12	2	2	3	1	6	43	8	4	6	7	3	3	36	72	B. abortus bv3	Cattle	Italy	2011
2013Garofolo_5362	1753	5362	4	5	3	12	2	2	3	1	6	43	8	4	6	7	3	3	36	72	B. abortus bv3	Buffalo	Italy	2011
2013Garofolo_19434	1689	19434	4	5	3	12	2	2	3	1	6	43	8	4	5	6	5	3	36	72	B. abortus bv3	Cattle	Italy	2011
2013Garofolo_5586	1755	5586	4	5	3	12	2	2	3	1	6	43	8	4	5	7	5	3	36	72	B. abortus bv3	Cattle	Italy	2011
2013Garofolo_7742	1790	7742	4	5	3	12	2	2	3	1	6	43	8	4	5	7	5	3	36	72	B. abortus bv3	Cattle	Italy	2011
2013Garofolo_11807	1621	11807	4	5	3	12	2	2	3	1	6	43	8	3	5	7	3	3	36	72	B. abortus bv3	Cattle	Italy	2011
2013Garofolo_1159	1603	1159	4	5	3	12	2	2	3	1	6	43	8	4	5	7	6	3	36	72	B. abortus bv3	Cattle	Italy	2011
2013Garofolo_7747	1791	7747	4	5	3	12	2	2	3	1	6	43	8	4	5	8	6	3	36	72	B. abortus bv3	Cattle	Italy	2011
2013Garofolo_11786	1611	11786	4	5	3	12	2	2	3	1	6	43	8	3	5	7	3	3	36	72	B. abortus bv3	Cattle	Italy	2011
2013Garofolo_11795	1615	11795	4	5	3	12	2	2	3	1	6	43	8	3	5	7	3	3	36	72	B. abortus bv3	Cattle	Italy	2011
2013Garofolo_1965	1691	1965	4	5	3	12	2	2	3	1	6	43	8	4	5	5	4	3	36	72	B. abortus bv3	Cattle	Italy	2011
2013Garofolo_12178	1634	12178	4	5	3	12	2	2	3	1	6	43	8	4	6	8	3	3	36	72	B. abortus bv3	Cattle	Italy	2011
2013Garofolo_3921	1731	3921	4	5	3	12	2	2	3	1	6	43	8	4	6	6	3	3	36	72	B. abortus bv3	Cattle	Italy	2011
2013Garofolo_5007	1749	5007	4	5	3	12	2	2	3	1	6	43	8	4	6	6	3	3	36	72	B. abortus bv3	Cattle	Italy	2011
2013Garofolo_6863	1779	6863	4	5	3	12	2	2	3	1	6	43	8	4	6	6	3	3	36	72	B. abortus bv3	Cattle	Italy	2011
2013Garofolo_6060	1764	6060	4	5	3	12	2	2	3	1	6	43	8	4	4	5	4	3	36	72	B. abortus bv3	Cattle	Italy	2011
2013Garofolo_15074	1668	15074	4	5	3	12	2	2	3	1	6	43	8	4	5	6	5	3	36	72	B. abortus bv3	Cattle	Italy	2011
2013Garofolo_11783	1610	11783	4	5	3	12	2	2	3	1	6	43	8	3	5	6	3	3	36	72	B. abortus bv3	Cattle	Italy	2011
2013Garofolo_6900	1781	6900	4	5	3	12	2	2	3	1	6	43	8	4	5	6	4	3	36	72	B. abortus bv3	Cattle	Italy	2011
2013Garofolo_8985	1798	8985	4	5	3	12	2	2	3	1	6	43	8	4	5	6	4	3	36	72	B. abortus bv3	Cattle	Italy	2011
2013Garofolo_12185	1637	12185	4	5	3	12	2	2	3	1	6	43	8	4	6	7	3	3	36	72	B. abortus bv3	Cattle	Italy	2011
2013Garofolo_20825	1700	20825	4	5	3	12	2	2	3	1	6	43	8	4	6	8	3	3	36	72	B. abortus bv3	Cattle	Italy	2011
2013Garofolo_1166	1606	1166	4	5	3	12	2	2	3	1	6	43	8	4	5	7	6	3	36	72	B. abortus bv3	Cattle	Italy	2011
2013Garofolo_12184	1636	12184	4	5	3	12	2	2	3	1	6	43	8	4	7	8	3	3	36	72	B. abortus bv3	Cattle	Italy	2011
2013Garofolo_8984	1797	8984	4	5	3	12	2	2	3	1	6	43	8	4	6	7	3	3	36	72	B. abortus bv3	Cattle	Italy	2011
2013Garofolo_17472	1677	17472	4	5	3	12	2	2	3	1	6	43	8	6	6	5	4	3	36	72	B. abortus bv3	Cattle	Italy	2011
2013Garofolo_6047	1757	6047	4	5	3	12	2	2	3	1	6	43	8	6	6	5	4	3	36	72	B. abortus bv3	Cattle	Italy	2011
2013Garofolo_9060	1801	9060	4	5	3	12	2	2	3	1	6	43	8	6	6	5	4	3	36	72	B. abortus bv3	Cattle	Italy	2011
2006LeFleche#115	115	BCCN#95-34	4	5	3	12	2	2	3	1	6	43	8	3	5	8	3	3	36	72	B. abortus bv3	Cattle	Italy	1995
2013Garofolo_22842	1711	22842	4	5	3	12	2	2	3	1	6	43	8	4	6	7	3	3	36	72	B. abortus bv3	Cattle	Italy	2011
2013Garofolo_3920	1730	3920	4	5	3	12	2	2	3	1	6	43	8	4	6	7	3	3	36	72	B. abortus bv3	Cattle	Italy	2011
2013Garofolo_8980	1795	8980	4	5	3	12	2	2	3	1	6	43	8	4	6	7	3	3	36	72	B. abortus bv3	Cattle	Italy	2011
2013Garofolo_11796	1616	11796	4	5	3	12	2	2	3	1	6	43	8	3	5	7	3	3	36	72	B. abortus bv3	Cattle	Italy	2011
2013Garofolo_11809	1622	11809	4	5	3	12	2	2	3	1	6	43	8	3	5	7	3	3	36	72	B. abortus bv3	Cattle	Italy	2011
2013Garofolo_12839	1644	12839	4	5	3	12	2	2	3	1	6	43	8	6	6	5	4	3	36	72	B. abortus bv3	Cattle	Italy	2011
2013Garofolo_12848	1647	12848	4	5	3	12	2	2	3	1	6	43	8	4	5	7	5	3	36	72	B. abortus bv3	Cattle	Italy	2011
2013Garofolo_17476	1680	17476	4	5	3	12	2	2	3	1	6	43	8	6	6	5	4	3	36	72	B. abortus bv3	Cattle	Italy	2011
2013Garofolo_6459	1769	6459	4	5	3	12	2	2	3	1	6	43	8	6	6	5	4	3	36	72	B. abortus bv3	Cattle	Italy	2011
2013Garofolo_6463	1771	6463	4	5	3	12	2	2	3	1	6	43	8	5	5	5	4	3	36	72	B. abortus bv3	Cattle	Italy	2011
2013Garofolo_9059	1800	9059	4	5	3	12	2	2	3	1	6	43	8	6	6	5	4	3	36	72	B. abortus bv3	Cattle	Italy	2011
2013Garofolo_12837	1643	12837	4	5	3	12	2	2	3	1	6	43	8	4	5	7	5	3	36	72	B. abortus bv3	Cattle	Italy	2011
2013Garofolo_12847	1646	12847	4	5	3	12	2	2	3	1	6	43	8	4	5	7	5	3	36	72	B. abortus bv3	Cattle	Italy	2011
2013Garofolo_18948	1686	18948	4	5	3	12	2	2	3	1	6	43	8	4	5	7	5	3	36	72	B. abortus bv3	Cattle	Italy	2011
2013Garofolo_2216	1707	2216	4	5	3	12	2	2	3	1	6	43	8	4	5	7	5	3	36	72	B. abortus bv3	Cattle	Italy	2011
2013Garofolo_2222	1708	2222	4	5	3	12	2	2	3	1	6	43	8	4	5	7	5	3	36	72	B. abortus bv3	Cattle	Italy	2011
2013Garofolo_3270	1721	3270	4	5	3	12	2	2	3	1	6	43	8	4	5	7	5	3	36	72	B. abortus bv3	Cattle	Italy	2011
2013Garofolo_3821	1727	3821	4	5	3	12	2	2	3	1	6	43	8	4	5	7	5	3	36	72	B. abortus bv3	Cattle	Italy	2011
2013Garofolo_6064	1766	6064	4	5	3	12	2	2	3	1	6	43	8	4	5	7	5	3	36	72	B. abortus bv3	Cattle	Italy	2011
2013Garofolo_6461	1770	6461	4	5	3	12	2	2	3	1	6	43	8	4	5	7	5	3	36	72	B. abortus bv3	Cattle	Italy	2011
2013Garofolo_9056	1799	9056	4	5	3	12	2	2	3	1	6	43	8	4	5	7	5	3	36	72	B. abortus bv3	Cattle	Italy	2011
2013Garofolo_6903	1784	6903	4	5	3	12	2	2	3	1	6	43	8	5	5	6	4	3	36	72	B. abortus bv3	Cattle	Italy	2011
2013Garofolo_21677	1705	21677	4	5	3	12	2	2	3	1	6	43	8	4	5	6	5	3	36	72	B. abortus bv3	Cattle	Italy	2011
2013Garofolo_12177	1633	RB51_12177	4	5	4	12	2	3	3	3	6	43	8	3	7	3	3	5	27	79	B. abortus Rough	Buffalo	Italy	2011
2006LeFleche#106	106	BCCN#96-62	4	5	4	12	2	2	3	3	4	43	8	4	4	3	3	4	28	81	B. abortus bv1	Cattle	Italy	1996
2013Garofolo_20001	1694	20001	4	5	4	12	2	2	3	3	6	43	8	4	7	3	3	4	28	82	B. abortus bv1	Buffalo	Italy	2011
2013Garofolo_8979	1794	8979	4	5	4	12	2	2	3	3	6	43	8	3	4	3	3	4	28	82	B. abortus bv1	Buffalo	Italy	2011
2013Garofolo_2647	1714	2647	4	5	4	12	2	2	3	3	6	43	8	4	6	3	7	4	28	82	B. abortus bv3	Cattle	Italy	2011
2013Garofolo_20823	1699	20823	4	5	4	12	2	2	3	3	6	43	8	3	7	3	3	4	28	82	B. abortus bv1	Buffalo	Italy	2011
2013Garofolo_6055	1760	6055	4	5	4	12	2	2	3	3	6	43	8	4	5	3	5	7	28	82	B. abortus bv1	Cattle	Italy	2011
2013Garofolo_9261	1804	9261	4	5	4	12	2	2	3	3	6	43	8	4	5	3	5	7	28	82	B. abortus bv1	Cattle	Italy	2011
2013Garofolo_13928	1666	13928	4	5	4	12	2	2	3	3	6	43	8	4	6	3	6	4	28	82	B. abortus bv1	Cattle	Italy	2011
2006LeFleche#116	116	BCCN#95-31	4	5	4	12	2	2	3	3	6	43	8	4	7	3	4	5	28	82	B. abortus bv4	Cattle	Italy	1995
2013Garofolo_8486	1793	8486	4	5	2	12	2	2	3	3	6	43	8	4	5	3	3	3	108	208	B. abortus bv3	Cattle	Italy	2011
2013Garofolo_18080	1681	18080	4	5	2	12	2	2	3	3	6	43	8	4	5	3	3	3	108	208	B. abortus bv3	Cattle	Italy	2011
2013Garofolo_1265	1642	1265	4	5	3	12	2	2	2	3	6	36	8	6	6	3	3	2	111	209	B. abortus bv3	Cattle	Italy	2011
2013Garofolo_1368	1664	1368	4	5	3	12	2	2	3	3	6	43	8	4	5	3	3	3	112	210	B. abortus bv3	Cattle	Italy	2011
2013Garofolo_1600	1676	1600	4	5	3	12	2	2	3	3	6	43	8	4	5	3	3	3	112	210	B. abortus bv3	Cattle	Italy	2011
2013Garofolo_18081	1682	18081	4	5	3	12	2	2	3	3	6	43	8	7	6	3	3	3	112	210	B. abortus bv3	Cattle	Italy	2011
2013Garofolo_20016	1695	20016	4	5	3	12	2	2	3	3	6	43	8	4	5	3	3	3	112	210	B. abortus bv3	Cattle	Italy	2011
2013Garofolo_3272	1723	3272	4	5	3	12	2	2	3	3	6	43	8	7	6	3	3	3	112	210	B. abortus bv3	Cattle	Italy	2011
2013Garofolo_2705	1718	2705	4	5	3	12	2	2	3	3	6	43	8	4	5	3	3	3	112	210	B. abortus bv3	Cattle	Italy	2011
2013Garofolo_1369	1665	1369	4	5	3	12	2	2	3	3	6	43	8	4	5	3	3	3	112	210	B. abortus bv3	Cattle	Italy	2011
2013Garofolo_2078	1697	2078	4	5	3	12	2	2	3	3	6	43	8	4	5	3	3	3	112	210	B. abortus bv3	Cattle	Italy	2011
2013Garofolo_3915	1728	3915	4	5	3	12	2	2	3	3	6	43	8	4	5	3	3	3	112	210	B. abortus bv3	Cattle	Italy	2011
2013Garofolo_1046	1598	1046	4	5	3	12	2	2	3	3	6	43	8	4	5	3	3	3	112	210	B. abortus bv3	Cattle	Italy	2011
2013Garofolo_8982	1796	8982	4	5	3	12	2	2	3	3	6	43	8	4	5	3	3	3	112	210	B. abortus bv3	Cattle	Italy	2011
2013Garofolo_15073	1667	15073	4	5	3	12	2	2	3	3	6	43	8	4	5	3	3	3	112	210	B. abortus bv3	Cattle	Italy	2011
2013Garofolo_15076	1669	15076	4	5	3	12	2	2	3	3	6	43	8	4	5	3	3	3	112	210	B. abortus bv3	Cattle	Italy	2011
2013Garofolo_1366	1663	1366	4	5	3	12	2	2	3	3	6	43	8	4	5	3	3	3	112	210	B. abortus bv3	Cattle	Italy	2011
2013Garofolo_6906	1787	6906	4	5	3	12	1	2	3	1	6	43	8	4	6	7	3	3	113	211	B. abortus bv3	Cattle	Italy	2011
2013Garofolo_5361	1752	5361	4	5	3	12	1	2	3	1	6	43	8	4	6	7	3	3	113	211	B. abortus bv3	Buffalo	Italy	2011
2016Shevtsova#065	2534	116/2-15-G (20)	4	5	3	12	2	2	3	1	7	43	8	6	5	7	3	3	36	70	B. abortus	Cattle	Kazakhstan	2015
2016Shevtsova#080	2549	116/2-15-G (5)	4	5	3	12	2	2	3	1	7	43	8	6	5	7	3	3	36	70	B. abortus	Cattle	Kazakhstan	2015
2016Shevtsova#069	2538	116/2-15-G (17)	4	5	3	12	2	2	3	1	7	43	8	6	5	7	3	3	36	70	B. abortus	Cattle	Kazakhstan	2015
2016Shevtsova#079	2548	116/2-15-G (6)	4	5	3	12	2	2	3	1	7	43	8	6	5	7	3	3	36	70	B. abortus	Cattle	Kazakhstan	2015
2016Shevtsova#084	2553	116/2-15-G (1)	4	5	3	12	2	2	3	1	7	43	8	6	5	7	3	3	36	70	B. abortus	Cattle	Kazakhstan	2015
2016Shevtsova#078	2547	116/2-15-G (7)	4	5	3	12	2	2	3	1	7	43	8	6	5	7	3	3	36	70	B. abortus	Cattle	Kazakhstan	2015
2016Shevtsova#086	2555	040-15-G	4	5	3	12	2	2	3	1	6	43	8	4	8	11	3	3	36	72	B. abortus	Cattle	Kazakhstan	2015
2016Shevtsova#033	2502	65Ak	4	5	3	12	2	2	3	1	6	43	8	5	7	6	3	3	36	72	B. abortus	Cattle	Kazakhstan	1965
2015Shevtsov#026	2227	B. abortus is1a	4	5	3	12	2	2	3	1	6	43	8	4	8	13	3	3	36	72	B. abortus	Cattle	Kazakhstan	2013
2016Shevtsova#068	2537	116/2-15-G (18)	4	5	3	12	2	2	3	1	6	43	8	5	9	11	3	3	36	72	B. abortus	Cattle	Kazakhstan	2015
2016Shevtsova#042	2511	70Al	4	5	3	12	2	2	3	1	6	43	8	5	6	3	3	3	36	72	B. abortus	Cattle	Kazakhstan	1970
2016Shevtsova#029	2498	59Al	4	5	3	12	2	2	3	1	6	43	8	3	3	7	3	3	36	72	B. abortus	Cattle	Kazakhstan	1959
2016Shevtsova#040	2509	66Al	4	5	3	12	2	2	3	1	6	43	8	4	8	8	3	3	36	72	B. abortus	Cattle	Kazakhstan	1966
2016Shevtsova#041	2510	57Al	4	5	3	12	2	2	3	1	6	43	8	5	7	10	3	3	36	72	B. abortus	Cattle	Kazakhstan	1957
2016Shevtsova#044	2513	57Al	4	5	3	12	2	2	3	1	6	43	8	5	7	5	3	3	36	72	B. abortus	Cattle	Kazakhstan	1957
2015Shevtsov#035	2236	B. abortus K 50	4	5	3	12	2	2	3	1	6	43	8	5	7	10	3	3	36	72	B. abortus bv6	Cattle	Kazakhstan	2008
2015Shevtsov#036	2237	B. abortus K 65	4	5	3	12	2	2	3	1	6	43	8	5	7	9	3	3	36	72	B. abortus bv6	Cattle	Kazakhstan	2008
2015Shevtsov#037	2238	B. abortus K 69	4	5	3	12	2	2	3	1	6	43	8	5	7	10	3	3	36	72	B. abortus bv6	Cattle	Kazakhstan	2008
2015Shevtsov#039	2240	B. abortus K 70	4	5	3	12	2	2	3	1	6	43	8	5	7	9	3	3	36	72	B. abortus bv6	Cattle	Kazakhstan	2008
2015Shevtsov#041	2242	B. abortus K 72	4	5	3	12	2	2	3	1	6	43	8	5	7	10	3	3	36	72	B. abortus bv6	Cattle	Kazakhstan	2008
2015Shevtsov#042	2243	B. abortus K 73	4	5	3	12	2	2	3	1	6	43	8	5	7	9	3	3	36	72	B. abortus bv6	Cattle	Kazakhstan	2008
2015Shevtsov#044	2245	B. abortus K 75	4	5	3	12	2	2	3	1	6	43	8	5	7	10	3	3	36	72	B. abortus bv6	Cattle	Kazakhstan	2008
2015Shevtsov#040	2241	B. abortus K 71	4	5	3	12	2	2	3	1	6	43	8	5	7	10	3	3	36	72	B. abortus bv6	Cattle	Kazakhstan	2008
2015Shevtsov#043	2244	B. abortus K 74	4	5	3	12	2	2	3	1	6	43	8	5	7	10	3	3	36	72	B. abortus bv6	Cattle	Kazakhstan	2008
2015Shevtsov#045	2246	B. abortus K 76	4	5	3	12	2	2	3	1	6	43	8	5	7	9	3	3	36	72	B. abortus bv6	Cattle	Kazakhstan	2008
2016Shevtsova#026	2495	69AtCam	4	5	3	12	2	2	3	1	6	43	8	5	6	7	3	3	36	72	B. abortus	Camel	Kazakhstan	1969
2016Shevtsova#025	2494	69At	4	5	3	12	2	2	3	1	6	43	8	5	7	10	3	3	36	72	B. abortus	Cattle	Kazakhstan	1969
2016Shevtsova#062	2531	116/2-15-G (24)	4	5	3	12	2	2	3	1	6	43	8	4	7	8	3	3	36	72	B. abortus	Cattle	Kazakhstan	2015
2016Shevtsova#034	2503	70Ak	4	5	3	12	2	2	3	1	6	43	8	5	7	6	3	3	36	72	B. abortus	Cattle	Kazakhstan	1970
2015Shevtsov#101	2302	B. abortus Kos 4105	4	5	3	12	2	2	3	1	6	43	8	5	7	10	3	3	36	72	B. abortus	Cattle	Kazakhstan	2009
2015Shevtsov#102	2303	B. abortus Kos 4108	4	5	3	12	2	2	3	1	6	43	8	5	7	10	3	3	36	72	B. abortus	Cattle	Kazakhstan	2009
2015Shevtsov#033	2234	B. abortus K 27	4	5	3	12	2	2	3	1	6	43	8	5	7	10	3	3	36	72	B. abortus bv6	Cattle	Kazakhstan	2008
2015Shevtsov#034	2235	B. abortus K 41	4	5	3	12	2	2	3	1	6	43	8	5	7	10	3	3	36	72	B. abortus bv6	Cattle	Kazakhstan	2008
2015Shevtsov#046	2247	B. abortus K 77	4	5	3	12	2	2	3	1	6	43	8	5	7	10	3	3	36	72	B. abortus bv6	Cattle	Kazakhstan	2008
2015Shevtsov#047	2248	B. abortus K 79	4	5	3	12	2	2	3	1	6	43	8	5	7	10	3	3	36	72	B. abortus bv6	Cattle	Kazakhstan	2008
2015Shevtsov#048	2249	B. abortus K 80	4	5	3	12	2	2	3	1	6	43	8	5	7	9	3	3	36	72	B. abortus bv6	Cattle	Kazakhstan	2008
2015Shevtsov#053	2254	B. abortus K 86	4	5	3	12	2	2	3	1	6	43	8	5	7	10	3	3	36	72	B. abortus bv6	Cattle	Kazakhstan	2008
2015Shevtsov#054	2255	B. abortus K 87	4	5	3	12	2	2	3	1	6	43	8	5	7	9	3	3	36	72	B. abortus bv6	Cattle	Kazakhstan	2008
2015Shevtsov#098	2299	B. abortus Kos 4104	4	5	3	12	2	2	3	1	6	43	8	5	7	10	3	3	36	72	B. abortus	Cattle	Kazakhstan	2009
2015Shevtsov#099	2300	B. abortus Kos 4106	4	5	3	12	2	2	3	1	6	43	8	5	7	10	3	3	36	72	B. abortus	Cattle	Kazakhstan	2009
2015Shevtsov#103	2304	B. abortus Kos 4107	4	5	3	12	2	2	3	1	6	43	8	5	7	10	3	3	36	72	B. abortus	Cattle	Kazakhstan	2009
2015Shevtsov#032	2233	B. abortus K 23	4	5	3	12	2	2	3	1	6	43	8	5	7	9	3	3	36	72	B. abortus bv6	Cattle	Kazakhstan	2008
2015Shevtsov#050	2251	B. abortus K 83	4	5	3	12	2	2	3	1	6	43	8	5	7	10	3	3	36	72	B. abortus bv6	Cattle	Kazakhstan	2008
2015Shevtsov#051	2252	B. abortus K 84	4	5	3	12	2	2	3	1	6	43	8	5	7	10	3	3	36	72	B. abortus bv6	Cattle	Kazakhstan	2008
2015Shevtsov#052	2253	B. abortus K 85	4	5	3	12	2	2	3	1	6	43	8	5	7	10	3	3	36	72	B. abortus bv6	Cattle	Kazakhstan	2008
2015Shevtsov#055	2256	B. abortus K 24	4	5	3	12	2	2	3	1	6	43	8	5	7	10	3	3	36	72	B. abortus bv6	Cattle	Kazakhstan	2008
2015Shevtsov#056	2257	B. abortus K 25	4	5	3	12	2	2	3	1	6	43	8	5	7	10	3	3	36	72	B. abortus bv6	Cattle	Kazakhstan	2008
2015Shevtsov#057	2258	B. abortus K 26	4	5	3	12	2	2	3	1	6	43	8	5	7	9	3	3	36	72	B. abortus bv6	Cattle	Kazakhstan	2008
2015Shevtsov#058	2259	B. abortus K 28	4	5	3	12	2	2	3	1	6	43	8	5	7	10	3	3	36	72	B. abortus bv6	Cattle	Kazakhstan	2008
2015Shevtsov#059	2260	B. abortus K 29	4	5	3	12	2	2	3	1	6	43	8	5	7	10	3	3	36	72	B. abortus bv6	Cattle	Kazakhstan	2008
2015Shevtsov#061	2262	B. abortus K 31	4	5	3	12	2	2	3	1	6	43	8	5	7	9	3	3	36	72	B. abortus bv6	Cattle	Kazakhstan	2008
2015Shevtsov#062	2263	B. abortus K 32	4	5	3	12	2	2	3	1	6	43	8	5	7	9	3	3	36	72	B. abortus bv6	Cattle	Kazakhstan	2008
2015Shevtsov#063	2264	B. abortus K 33	4	5	3	12	2	2	3	1	6	43	8	5	7	10	3	3	36	72	B. abortus bv6	Cattle	Kazakhstan	2008
2015Shevtsov#064	2265	B. abortus K 34	4	5	3	12	2	2	3	1	6	43	8	5	7	9	3	3	36	72	B. abortus bv6	Cattle	Kazakhstan	2008
2015Shevtsov#027	2228	B. abortus is4a	4	5	3	12	2	2	3	1	6	43	8	4	8	13	3	3	36	72	B. abortus	Cattle	Kazakhstan	2013
2016Shevtsova#020	2489	304/2-15-G (1)	4	5	3	12	2	2	3	1	6	43	8	5	6	7	3	3	36	72	B. abortus	Cattle	Kazakhstan	2015
2016Shevtsova#039	2508	68Al	4	5	3	12	2	2	3	1	6	43	8	3	3	7	3	3	36	72	B. abortus	Cattle	Kazakhstan	1968
2016Shevtsova#027	2496	1106	4	5	3	12	2	2	3	1	6	43	8	4	7	6	3	3	36	72	B. abortus	Cattle	Kazakhstan	1961
2016Shevtsova#038	2507	1105	4	5	3	12	2	2	3	1	6	43	8	4	7	6	3	3	36	72	B. abortus	Cattle	Kazakhstan	1961
2016Shevtsova#023	2492	52Al	4	5	3	12	2	2	3	1	6	43	8	5	7	10	3	3	36	72	B. abortus	Cattle	Kazakhstan	1952
2015Shevtsov#003	2204	B. abortus 671	4	5	3	12	2	2	3	1	6	43	8	5	7	10	3	3	36	72	B. abortus bv1	Cattle	Kazakhstan	2011
2015Shevtsov#004	2205	B. abortus 672	4	5	3	12	2	2	3	1	6	43	8	5	7	10	3	3	36	72	B. abortus bv1	Cattle	Kazakhstan	2011
2015Shevtsov#005	2206	B. abortus 674	4	5	3	12	2	2	3	1	6	43	8	4	12	10	3	3	36	72	B. abortus bv1	Cattle	Kazakhstan	2011
2015Shevtsov#006	2207	B. abortus 679	4	5	3	12	2	2	3	1	6	43	8	5	7	10	3	3	36	72	B. abortus bv1	Cattle	Kazakhstan	2011
2015Shevtsov#007	2208	B. abortus 683	4	5	3	12	2	2	3	1	6	43	8	5	7	10	3	3	36	72	B. abortus bv1	Cattle	Kazakhstan	2011
2015Shevtsov#008	2209	B. abortus 687	4	5	3	12	2	2	3	1	6	43	8	5	7	10	3	3	36	72	B. abortus bv1	Cattle	Kazakhstan	2011
2015Shevtsov#009	2210	B. abortus 687	4	5	3	12	2	2	3	1	6	43	8	5	7	10	3	3	36	72	B. abortus bv1	Cattle	Kazakhstan	2011
2015Shevtsov#010	2211	B. abortus 688	4	5	3	12	2	2	3	1	6	43	8	5	7	10	3	3	36	72	B. abortus bv1	Cattle	Kazakhstan	2011
2015Shevtsov#011	2212	B. abortus 690	4	5	3	12	2	2	3	1	6	43	8	5	7	10	3	3	36	72	B. abortus bv1	Cattle	Kazakhstan	2011
2015Shevtsov#012	2213	B. abortus 691	4	5	3	12	2	2	3	1	6	43	8	5	7	10	3	3	36	72	B. abortus bv1	Cattle	Kazakhstan	2011
2015Shevtsov#014	2215	B. abortus 693	4	5	3	12	2	2	3	1	6	43	8	5	7	10	3	3	36	72	B. abortus bv1	Cattle	Kazakhstan	2011
2015Shevtsov#015	2216	B. abortus 694	4	5	3	12	2	2	3	1	6	43	8	5	7	10	3	3	36	72	B. abortus bv1	Cattle	Kazakhstan	2011
2015Shevtsov#016	2217	B. abortus 706	4	5	3	12	2	2	3	1	6	43	8	5	7	6	3	3	36	72	B. abortus bv1	Cattle	Kazakhstan	2011
2015Shevtsov#017	2218	B. abortus 708	4	5	3	12	2	2	3	1	6	43	8	5	7	10	3	3	36	72	B. abortus bv1	Cattle	Kazakhstan	2011
2015Shevtsov#018	2219	B. abortus 710	4	5	3	12	2	2	3	1	6	43	8	5	7	10	3	3	36	72	B. abortus bv1	Cattle	Kazakhstan	2011
2015Shevtsov#019	2220	B. abortus 711	4	5	3	12	2	2	3	1	6	43	8	5	7	10	3	3	36	72	B. abortus bv1	Cattle	Kazakhstan	2011
2015Shevtsov#020	2221	B. abortus 712	4	5	3	12	2	2	3	1	6	43	8	5	7	10	3	3	36	72	B. abortus bv1	Cattle	Kazakhstan	2011
2015Shevtsov#105	2306	B. abortus 1058	4	5	3	12	2	2	3	1	6	43	8	5	7	10	3	3	36	72	B. abortus bv1	Cattle	Kazakhstan	2010
2015Shevtsov#106	2307	B. abortus 1160	4	5	3	12	2	2	3	1	6	43	8	5	7	10	3	3	36	72	B. abortus bv1	Cattle	Kazakhstan	2010
2015Shevtsov#107	2308	B. abortus 1169	4	5	3	12	2	2	3	1	6	43	8	4	12	10	3	3	36	72	B. abortus bv1	Cattle	Kazakhstan	2010
2015Shevtsov#108	2309	B. abortus 1950	4	5	3	12	2	2	3	1	6	43	8	5	7	10	3	3	36	72	B. abortus bv1	Cattle	Kazakhstan	2010
2015Shevtsov#109	2310	B. abortus 38	4	5	3	12	2	2	3	1	6	43	8	5	7	10	3	3	36	72	B. abortus bv1	Cattle	Kazakhstan	2010
2015Shevtsov#110	2311	B. abortus 38 42	4	5	3	12	2	2	3	1	6	43	8	5	7	10	3	3	36	72	B. abortus bv1	Cattle	Kazakhstan	2010
2015Shevtsov#111	2312	B. abortus 4253	4	5	3	12	2	2	3	1	6	43	8	5	7	10	3	3	36	72	B. abortus bv1	Cattle	Kazakhstan	2010
2015Shevtsov#112	2313	B. abortus 43 62	4	5	3	12	2	2	3	1	6	43	8	5	7	10	3	3	36	72	B. abortus bv1	Cattle	Kazakhstan	2010
2015Shevtsov#113	2314	B. abortus 1230	4	5	3	12	2	2	3	1	6	43	8	5	7	10	3	3	36	72	B. abortus bv1	Cattle	Kazakhstan	2011
2015Shevtsov#114	2315	B. abortus 1238	4	5	3	12	2	2	3	1	6	43	8	5	7	10	3	3	36	72	B. abortus bv1	Cattle	Kazakhstan	2011
2015Shevtsov#116	2317	B. abortus 1057	4	5	3	12	2	2	3	1	6	43	8	5	7	10	3	3	36	72	B. abortus bv1	Cattle	Kazakhstan	2011
2015Shevtsov#117	2318	B. abortus 1073	4	5	3	12	2	2	3	1	6	43	8	5	7	10	3	3	36	72	B. abortus bv1	Cattle	Kazakhstan	2011
2015Shevtsov#118	2319	B. abortus 1077	4	5	3	12	2	2	3	1	6	43	8	5	7	10	3	3	36	72	B. abortus bv1	Cattle	Kazakhstan	2011
2015Shevtsov#119	2320	B. abortus 1087	4	5	3	12	2	2	3	1	6	43	8	5	7	10	3	3	36	72	B. abortus bv1	Cattle	Kazakhstan	2011
2015Shevtsov#120	2321	B. abortus 1097	4	5	3	12	2	2	3	1	6	43	8	5	7	10	3	3	36	72	B. abortus bv1	Cattle	Kazakhstan	2011
2015Shevtsov#122	2323	B. abortus 1229	4	5	3	12	2	2	3	1	6	43	8	5	7	10	3	3	36	72	B. abortus bv1	Cattle	Kazakhstan	2011
2015Shevtsov#123	2324	B. abortus 1242	4	5	3	12	2	2	3	1	6	43	8	5	7	10	3	3	36	72	B. abortus bv1	Cattle	Kazakhstan	2011
2015Shevtsov#125	2326	B. abortus 670	4	5	3	12	2	2	3	1	6	43	8	5	7	10	3	3	36	72	B. abortus bv1	Cattle	Kazakhstan	2011
2015Shevtsov#100	2301	B. abortus 1126	4	5	3	12	2	2	3	1	6	43	8	5	7	10	3	3	36	72	B. abortus bv1	Cattle	Kazakhstan	2009
2015Shevtsov#088	2289	B. abortus K 60	4	5	3	12	2	2	3	1	6	43	8	5	7	9	3	3	36	72	B. abortus bv6	Cattle	Kazakhstan	2008
2015Shevtsov#089	2290	B. abortus K 61	4	5	3	12	2	2	3	1	6	43	8	5	7	9	3	3	36	72	B. abortus bv6	Cattle	Kazakhstan	2008
2015Shevtsov#090	2291	B. abortus K 62	4	5	3	12	2	2	3	1	6	43	8	5	7	9	3	3	36	72	B. abortus bv6	Cattle	Kazakhstan	2008
2015Shevtsov#091	2292	B. abortus K 63	4	5	3	12	2	2	3	1	6	43	8	5	7	10	3	3	36	72	B. abortus bv6	Cattle	Kazakhstan	2008
2015Shevtsov#092	2293	B. abortus K 64	4	5	3	12	2	2	3	1	6	43	8	5	7	9	3	3	36	72	B. abortus bv6	Cattle	Kazakhstan	2008
2015Shevtsov#094	2295	B. abortus K 66	4	5	3	12	2	2	3	1	6	43	8	5	7	9	3	3	36	72	B. abortus bv6	Cattle	Kazakhstan	2008
2015Shevtsov#095	2296	B. abortus K 67	4	5	3	12	2	2	3	1	6	43	8	5	7	10	3	3	36	72	B. abortus bv6	Cattle	Kazakhstan	2008
2015Shevtsov#096	2297	B. abortus K 68	4	5	3	12	2	2	3	1	6	43	8	5	7	10	3	3	36	72	B. abortus bv6	Cattle	Kazakhstan	2008
2015Shevtsov#029	2230	B. abortus is3a	4	5	3	12	2	2	3	1	6	43	8	4	8	13	3	3	36	72	B. abortus	Cattle	Kazakhstan	2013
2016Shevtsova#036	2505	67Al	4	5	3	12	2	2	3	1	6	43	8	4	7	6	3	3	36	72	B. abortus	Cattle	Kazakhstan	1967
2016Shevtsova#064	2533	116/2-15-G (21)	4	5	3	12	2	2	3	1	6	43	8	5	9	11	3	3	36	72	B. abortus	Cattle	Kazakhstan	2015
2016Shevtsova#070	2539	116/2-15-G (16)	4	5	3	12	2	2	3	1	6	43	8	5	9	11	3	3	36	72	B. abortus	Cattle	Kazakhstan	2015
2016Shevtsova#072	2541	116/2-15-G (14)	4	5	3	12	2	2	3	1	6	43	8	5	9	11	3	3	36	72	B. abortus	Cattle	Kazakhstan	2015
2016Shevtsova#071	2540	116/2-15-G (15)	4	5	3	12	2	2	3	1	6	43	8	5	9	11	3	3	36	72	B. abortus	Cattle	Kazakhstan	2015
2016Shevtsova#083	2552	116/2-15-G (2)	4	5	3	12	2	2	3	1	6	43	8	5	9	11	3	3	36	72	B. abortus	Cattle	Kazakhstan	2015
2016Shevtsova#075	2544	116/2-15-G (11)	4	5	3	12	2	2	3	1	6	43	8	5	9	11	3	3	36	72	B. abortus	Cattle	Kazakhstan	2015
2015Shevtsov#065	2266	B. abortus K 35	4	5	3	12	2	2	3	1	6	43	8	5	7	10	3	3	36	72	B. abortus bv6	Cattle	Kazakhstan	2008
2015Shevtsov#066	2267	B. abortus K 36	4	5	3	12	2	2	3	1	6	43	8	5	7	10	3	3	36	72	B. abortus bv6	Cattle	Kazakhstan	2008
2015Shevtsov#067	2268	B. abortus K 37	4	5	3	12	2	2	3	1	6	43	8	5	7	10	3	3	36	72	B. abortus bv6	Cattle	Kazakhstan	2008
2015Shevtsov#068	2269	B. abortus K 38	4	5	3	12	2	2	3	1	6	43	8	5	7	9	3	3	36	72	B. abortus bv6	Cattle	Kazakhstan	2008
2015Shevtsov#069	2270	B. abortus K 39	4	5	3	12	2	2	3	1	6	43	8	5	7	9	3	3	36	72	B. abortus bv6	Cattle	Kazakhstan	2008
2015Shevtsov#070	2271	B. abortus K 40	4	5	3	12	2	2	3	1	6	43	8	5	7	10	3	3	36	72	B. abortus bv6	Cattle	Kazakhstan	2008
2015Shevtsov#072	2273	B. abortus K 42	4	5	3	12	2	2	3	1	6	43	8	5	7	9	3	3	36	72	B. abortus bv6	Cattle	Kazakhstan	2008
2015Shevtsov#073	2274	B. abortus K 43	4	5	3	12	2	2	3	1	6	43	8	5	7	9	3	3	36	72	B. abortus bv6	Cattle	Kazakhstan	2008
2015Shevtsov#074	2275	B. abortus K 44	4	5	3	12	2	2	3	1	6	43	8	5	7	10	3	3	36	72	B. abortus bv6	Cattle	Kazakhstan	2008
2015Shevtsov#075	2276	B. abortus K 45	4	5	3	12	2	2	3	1	6	43	8	5	7	9	3	3	36	72	B. abortus bv6	Cattle	Kazakhstan	2008
2015Shevtsov#076	2277	B. abortus K 46	4	5	3	12	2	2	3	1	6	43	8	5	7	9	3	3	36	72	B. abortus bv6	Cattle	Kazakhstan	2008
2015Shevtsov#077	2278	B. abortus K 47	4	5	3	12	2	2	3	1	6	43	8	5	7	9	3	3	36	72	B. abortus bv6	Cattle	Kazakhstan	2008
2015Shevtsov#078	2279	B. abortus K 48	4	5	3	12	2	2	3	1	6	43	8	5	7	10	3	3	36	72	B. abortus bv6	Cattle	Kazakhstan	2008
2015Shevtsov#079	2280	B. abortus K 49	4	5	3	12	2	2	3	1	6	43	8	5	7	10	3	3	36	72	B. abortus bv6	Cattle	Kazakhstan	2008
2015Shevtsov#080	2281	B. abortus K 51	4	5	3	12	2	2	3	1	6	43	8	5	7	10	3	3	36	72	B. abortus bv6	Cattle	Kazakhstan	2008
2015Shevtsov#081	2282	B. abortus K 53	4	5	3	12	2	2	3	1	6	43	8	5	7	10	3	3	36	72	B. abortus bv6	Cattle	Kazakhstan	2008
2015Shevtsov#083	2284	B. abortus K 54	4	5	3	12	2	2	3	1	6	43	8	5	7	9	3	3	36	72	B. abortus bv6	Cattle	Kazakhstan	2008
2015Shevtsov#084	2285	B. abortus K 55	4	5	3	12	2	2	3	1	6	43	8	5	7	10	3	3	36	72	B. abortus bv6	Cattle	Kazakhstan	2008
2015Shevtsov#085	2286	B. abortus K 56	4	5	3	12	2	2	3	1	6	43	8	5	7	9	3	3	36	72	B. abortus bv6	Cattle	Kazakhstan	2008
2015Shevtsov#086	2287	B. abortus K 58	4	5	3	12	2	2	3	1	6	43	8	5	7	9	3	3	36	72	B. abortus bv6	Cattle	Kazakhstan	2008
2015Shevtsov#087	2288	B. abortus K 59	4	5	3	12	2	2	3	1	6	43	8	5	7	9	3	3	36	72	B. abortus bv6	Cattle	Kazakhstan	2008
2016Shevtsova#063	2532	116/2-15-G (22)	4	5	3	12	2	2	3	1	6	43	8	4	7	8	3	3	36	72	B. abortus	Cattle	Kazakhstan	2015
2016Shevtsova#073	2542	116/2-15-G (13)	4	5	3	12	2	2	3	1	6	43	8	4	7	8	3	3	36	72	B. abortus	Cattle	Kazakhstan	2015
2016Shevtsova#081	2550	116/2-15-G (4)	4	5	3	12	2	2	3	1	6	43	8	4	8	6	3	3	36	72	B. abortus	Cattle	Kazakhstan	2015
2016Shevtsova#076	2545	116/2-15-G (10)	4	5	3	12	2	2	3	1	6	43	8	4	7	6	3	3	36	72	B. abortus	Cattle	Kazakhstan	2015
2016Shevtsova#066	2535	116/2-15-G (19)	4	5	3	12	2	2	3	1	6	43	8	5	13	4	3	3	36	72	B. abortus	Cattle	Kazakhstan	2015
2016Shevtsova#061	2530	116/2-15-G (25)	4	5	3	12	2	2	3	1	6	43	8	4	7	8	3	3	36	72	B. abortus	Cattle	Kazakhstan	2015
2016Shevtsova#074	2543	116/2-15-G (12)	4	5	3	12	2	2	3	1	6	43	8	4	8	6	3	3	36	72	B. abortus	Cattle	Kazakhstan	2015
2016Shevtsova#077	2546	116/2-15-G (8)	4	5	3	12	2	2	3	1	6	43	8	5	9	11	3	3	36	72	B. abortus	Cattle	Kazakhstan	2015
2016Shevtsova#067	2536	052/1-15-G	4	5	3	12	2	2	3	1	6	43	8	7	5	5	3	3	36	72	B. abortus	Cattle	Kazakhstan	2015
2015Shevtsov#001	2202	B. abortus 64 1	4	5	3	12	2	2	3	1	6	43	8	5	7	10	3	3	36	72	B. abortus bv3	Cattle	Kazakhstan	2007
2016Shevtsova#082	2551	116/2-15-G (3)	4	5	3	12	2	2	3	1	6	43	8	4	7	8	3	3	36	72	B. abortus	Cattle	Kazakhstan	2015
2015Shevtsov#002	2203	B. abortus K 4	4	5	3	12	2	2	3	1	6	43	8	5	7	10	3	3	36	72	B. abortus bv6	Cattle	Kazakhstan	2008
2015Shevtsov#013	2214	B. abortus K 7	4	5	3	12	2	2	3	1	6	43	8	5	7	10	3	3	36	72	B. abortus bv6	Cattle	Kazakhstan	2008
2015Shevtsov#024	2225	B. abortus K 8	4	5	3	12	2	2	3	1	6	43	8	5	7	9	3	3	36	72	B. abortus bv6	Cattle	Kazakhstan	2008
2015Shevtsov#031	2232	B. abortus K 9	4	5	3	12	2	2	3	1	6	43	8	5	7	10	3	3	36	72	B. abortus bv6	Cattle	Kazakhstan	2008
2015Shevtsov#038	2239	B. abortus K 11	4	5	3	12	2	2	3	1	6	43	8	5	7	10	3	3	36	72	B. abortus bv6	Cattle	Kazakhstan	2008
2015Shevtsov#049	2250	B. abortus K 12	4	5	3	12	2	2	3	1	6	43	8	5	7	10	3	3	36	72	B. abortus bv6	Cattle	Kazakhstan	2008
2015Shevtsov#060	2261	B. abortus K 15	4	5	3	12	2	2	3	1	6	43	8	5	7	9	3	3	36	72	B. abortus bv6	Cattle	Kazakhstan	2008
2015Shevtsov#071	2272	B. abortus K 17	4	5	3	12	2	2	3	1	6	43	8	5	7	9	3	3	36	72	B. abortus bv6	Cattle	Kazakhstan	2008
2015Shevtsov#082	2283	B. abortus K 19	4	5	3	12	2	2	3	1	6	43	8	5	7	10	3	3	36	72	B. abortus bv6	Cattle	Kazakhstan	2008
2015Shevtsov#093	2294	B. abortus K 2	4	5	3	12	2	2	3	1	6	43	8	5	7	10	3	3	36	72	B. abortus bv6	Cattle	Kazakhstan	2008
2015Shevtsov#097	2298	B. abortus K 6	4	5	3	12	2	2	3	1	6	43	8	5	7	10	3	3	36	72	B. abortus bv6	Cattle	Kazakhstan	2009
2015Shevtsov#104	2305	B. abortus K 20	4	5	3	12	2	2	3	1	6	43	8	5	7	9	3	3	36	72	B. abortus bv6	Cattle	Kazakhstan	2008
2015Shevtsov#115	2316	B. abortus K 3	4	5	3	12	2	2	3	1	6	43	8	5	7	10	3	3	36	72	B. abortus bv6	Cattle	Kazakhstan	2008
2015Shevtsov#021	2222	B. abortus 8213	4	5	3	12	2	2	3	1	6	43	8	5	7	10	3	3	36	72	B. abortus bv6	Cattle	Kazakhstan	2011
2015Shevtsov#022	2223	B. abortus 8392	4	5	3	12	2	2	3	1	6	43	8	5	7	10	3	3	36	72	B. abortus bv6	Cattle	Kazakhstan	2011
2015Shevtsov#023	2224	B. abortus 9460	4	5	3	12	2	2	3	1	6	43	8	4	12	10	3	3	36	72	B. abortus bv6	Cattle	Kazakhstan	2011
2015Shevtsov#025	2226	B. abortus 96	4	5	3	12	2	2	3	1	6	43	8	4	12	10	3	3	36	72	B. abortus bv6	Cattle	Kazakhstan	2011
2015Shevtsov#121	2322	B. abortus 1170	4	5	3	12	2	2	3	1	6	43	8	5	7	10	3	3	36	72	B. abortus bv6	Cattle	Kazakhstan	2011
2015Shevtsov#124	2325	B. abortus 1247	4	5	3	12	2	2	3	1	6	43	8	4	12	10	3	3	36	72	B. abortus bv6	Cattle	Kazakhstan	2011
2016Shevtsova#001	2470	228-15-B/G (6)	4	5	3	12	2	2	3	1	6	43	8	4	6	8	3	3	36	72	B. abortus	Cattle	Kazakhstan	2015
2016Shevtsova#002	2471	228-15-B/G (2)	4	5	3	12	2	2	3	1	6	43	8	4	6	8	3	3	36	72	B. abortus	Cattle	Kazakhstan	2015
2016Shevtsova#003	2472	228-15-B/G (11)	4	5	3	12	2	2	3	1	6	43	8	4	6	8	3	3	36	72	B. abortus	Cattle	Kazakhstan	2015
2016Shevtsova#004	2473	228-15-B/G (5)	4	5	3	12	2	2	3	1	6	43	8	4	6	8	3	3	36	72	B. abortus	Cattle	Kazakhstan	2015
2016Shevtsova#005	2474	228-15-B/G (18)	4	5	3	12	2	2	3	1	6	43	8	4	6	8	3	3	36	72	B. abortus	Cattle	Kazakhstan	2015
2016Shevtsova#006	2475	228-15-B/G (7)	4	5	3	12	2	2	3	1	6	43	8	4	6	8	3	3	36	72	B. abortus	Cattle	Kazakhstan	2015
2016Shevtsova#007	2476	228-15-B/G (8)	4	5	3	12	2	2	3	1	6	43	8	4	6	8	3	3	36	72	B. abortus	Cattle	Kazakhstan	2015
2016Shevtsova#008	2477	228-15-B/G (19)	4	5	3	12	2	2	3	1	6	43	8	4	6	8	3	3	36	72	B. abortus	Cattle	Kazakhstan	2015
2016Shevtsova#009	2478	228-15-B/G (12)	4	5	3	12	2	2	3	1	6	43	8	4	6	8	3	3	36	72	B. abortus	Cattle	Kazakhstan	2015
2016Shevtsova#010	2479	228-15-B/G (17)	4	5	3	12	2	2	3	1	6	43	8	4	6	8	3	3	36	72	B. abortus	Cattle	Kazakhstan	2015
2016Shevtsova#011	2480	228-15-B/G (20)	4	5	3	12	2	2	3	1	6	43	8	4	6	8	3	3	36	72	B. abortus	Cattle	Kazakhstan	2015
2016Shevtsova#012	2481	228-15-B/G (3)	4	5	3	12	2	2	3	1	6	43	8	4	6	8	3	3	36	72	B. abortus	Cattle	Kazakhstan	2015
2016Shevtsova#013	2482	228-15-B/G (13)	4	5	3	12	2	2	3	1	6	43	8	4	6	8	3	3	36	72	B. abortus	Cattle	Kazakhstan	2015
2016Shevtsova#014	2483	228-15-B/G (16)	4	5	3	12	2	2	3	1	6	43	8	4	6	8	3	3	36	72	B. abortus	Cattle	Kazakhstan	2015
2016Shevtsova#015	2484	228-15-B/G (9)	4	5	3	12	2	2	3	1	6	43	8	4	6	8	3	3	36	72	B. abortus	Cattle	Kazakhstan	2015
2016Shevtsova#016	2485	228-15-B/G (10)	4	5	3	12	2	2	3	1	6	43	8	4	6	8	3	3	36	72	B. abortus	Cattle	Kazakhstan	2015
2016Shevtsova#017	2486	228-15-B/G (4)	4	5	3	12	2	2	3	1	6	43	8	4	6	8	3	3	36	72	B. abortus	Cattle	Kazakhstan	2015
2016Shevtsova#019	2488	228-15-B/G (14)	4	5	3	12	2	2	3	1	6	43	8	4	6	8	3	3	36	72	B. abortus	Cattle	Kazakhstan	2015
2016Shevtsova#047	2516	109-15-G (5)	4	5	3	12	2	2	3	1	6	43	8	4	7	8	3	3	36	72	B. abortus	Cattle	Kazakhstan	2015
2016Shevtsova#048	2517	160-15-G (20)	4	5	3	12	2	2	3	1	6	43	8	4	6	8	3	3	36	72	B. abortus	Cattle	Kazakhstan	2015
2016Shevtsova#049	2518	160-15-G (19)	4	5	3	12	2	2	3	1	6	43	8	4	6	8	3	3	36	72	B. abortus	Cattle	Kazakhstan	2015
2016Shevtsova#050	2519	160-15-G (18)	4	5	3	12	2	2	3	1	6	43	8	4	6	8	3	3	36	72	B. abortus	Cattle	Kazakhstan	2015
2016Shevtsova#051	2520	160-15-G (17)	4	5	3	12	2	2	3	1	6	43	8	4	6	8	3	3	36	72	B. abortus	Cattle	Kazakhstan	2015
2016Shevtsova#052	2521	160-15-G (16)	4	5	3	12	2	2	3	1	6	43	8	4	6	8	3	3	36	72	B. abortus	Cattle	Kazakhstan	2015
2016Shevtsova#053	2522	160-15-G (15)	4	5	3	12	2	2	3	1	6	43	8	4	5	8	3	3	36	72	B. abortus	Cattle	Kazakhstan	2015
2016Shevtsova#054	2523	160-15-G (13)	4	5	3	12	2	2	3	1	6	43	8	4	7	8	3	3	36	72	B. abortus	Cattle	Kazakhstan	2015
2016Shevtsova#055	2524	160-15-G (11)	4	5	3	12	2	2	3	1	6	43	8	4	6	8	3	3	36	72	B. abortus	Cattle	Kazakhstan	2015
2016Shevtsova#056	2525	160-15-G (10)	4	5	3	12	2	2	3	1	6	43	8	4	6	8	3	3	36	72	B. abortus	Cattle	Kazakhstan	2015
2016Shevtsova#057	2526	160-15-G (9)	4	5	3	12	2	2	3	1	6	43	8	4	6	8	3	3	36	72	B. abortus	Cattle	Kazakhstan	2015
2016Shevtsova#058	2527	160-15-G (6)	4	5	3	12	2	2	3	1	6	43	8	4	6	8	3	3	36	72	B. abortus	Cattle	Kazakhstan	2015
2016Shevtsova#059	2528	160-15-G (5)	4	5	3	12	2	2	3	1	6	43	8	4	6	6	3	3	36	72	B. abortus	Cattle	Kazakhstan	2015
2016Shevtsova#060	2529	160-15-G (1)	4	5	3	12	2	2	3	1	6	43	8	4	6	8	3	3	36	72	B. abortus	Cattle	Kazakhstan	2015
2016Shevtsova#085	2554	155-15-G (7)	4	5	3	12	2	2	3	1	6	43	8	4	6	8	3	3	36	72	B. abortus	Cattle	Kazakhstan	2015
2016Shevtsova#087	2556	155-15-G (2)	4	5	3	12	2	2	3	1	6	43	8	4	6	8	3	3	36	72	B. abortus	Cattle	Kazakhstan	2015
2016Shevtsova#088	2557	150-15-G (13)	4	5	3	12	2	2	3	1	6	43	8	4	6	8	3	3	36	72	B. abortus	Cattle	Kazakhstan	2015
2016Shevtsova#032	2501	69WKR	4	5	3	12	2	2	3	1	6	43	8	3	3	7	3	3	36	72	B. abortus	Cattle	Kazakhstan	1969
2016Shevtsova#046	2515	69WKR	4	5	3	12	2	2	3	1	6	43	8	5	7	6	3	3	36	72	B. abortus	Cattle	Kazakhstan	1969
2016Shevtsova#021	2490	243-15-G	4	5	3	12	2	2	3	1	6	43	8	5	4	5	3	3	36	72	B. abortus	Cattle	Kazakhstan	2015
2016Shevtsova#043	2512	67WKR	4	5	3	12	2	2	3	1	6	43	8	3	3	7	3	3	36	72	B. abortus	Cattle	Kazakhstan	1967
2016Shevtsova#045	2514	48WKR	4	5	3	12	2	2	3	1	6	43	8	5	7	6	3	3	36	72	B. abortus	Cattle	Kazakhstan	1948
2015Shevtsov#028	2229	B. abortus is2a	4	5	3	12	2	2	3	1	6	43	8	4	8	13	3	3	36	72	B. abortus	Cattle	Kazakhstan	2013
2016Shevtsova#035	2504	43Al	4	5	4	12	2	2	3	3	6	43	8	4	4	3	4	5	28	82	B. abortus	Cattle	Kazakhstan	1943
2016Shevtsova#022	2491	57al2	4	5	4	12	2	2	3	3	6	43	8	4	4	3	4	5	28	82	B. abortus	Cattle	Kazakhstan	1957
2016Shevtsova#028	2497	68Al	4	5	4	12	2	2	3	3	6	43	8	3	6	3	3	5	28	82	B. abortus	Cattle	Kazakhstan	1968
2016Shevtsova#024	2493	85Ak	4	5	4	12	2	2	3	3	6	43	8	4	4	3	4	5	28	82	B. abortus	Cattle	Kazakhstan	1985
2016Shevtsova#089	2558	113-15-G (10)	3	5	3	12	2	2	3	1	6	43	8	4	6	4	3	3	167	338	B. abortus	Cattle	Kazakhstan	2015
2016Shevtsova#090	2559	113-15-G (1)	3	5	3	12	2	2	3	1	6	43	8	4	6	4	3	3	167	338	B. abortus	Cattle	Kazakhstan	2015
2016Shevtsova#030	2499	53Al	2	5	3	12	2	2	3	1	6	43	8	4	8	5	3	3	38	339	B. abortus	Cattle	Kazakhstan	1953
2016Shevtsova#031	2500	1947	4	5	3	12	2	2	3	1	4	43	8	4	5	5	3	3	36	340	B. abortus	Cattle	Kazakhstan	1947
2016Shevtsova#037	2506	60Al	2	5	3	12	2	2	3	1	7	43	8	4	9	6	3	3	38	341	B. abortus	Cattle	Kazakhstan	1960
2011Muendo#11	1286	11-KEBa2	3	5	4	11	2	2	3	3	7	41	8	6	5	3	12	5	34	317	B. abortus bv3	Cattle	Kenya	2009
2011Muendo#12	1287	12-KEBa1	3	5	4	11	2	2	3	3	7	41	8	6	6	3	11	6	34	317	B. abortus bv3	Cattle	Kenya	2009
2011Muendo#13	1288	13-KEBa1	3	5	4	11	2	2	3	3	7	41	8	6	6	3	11	6	34	317	B. abortus bv3	Cattle	Kenya	2009
2011Muendo#14	1289	14-KEBa2	3	5	4	11	2	2	3	3	7	41	8	6	5	3	12	5	34	317	B. abortus bv3	Cattle	Kenya	2009
2011Muendo#15	1290	15-KEBa2	3	5	4	11	2	2	3	3	7	41	8	6	5	3	12	5	34	317	B. abortus bv3	Cattle	Kenya	2009
2011Muendo#06	1281	6-KEBa1	3	5	4	11	2	2	3	3	7	41	8	6	6	3	11	6	34	317	B. abortus bv3	Cattle	Kenya	2009
2011Muendo#07	1282	7-KEBa1	3	5	4	11	2	2	3	3	7	41	8	6	6	3	11	6	34	317	B. abortus bv3	Cattle	Kenya	2009
2011Muendo#08	1283	8-KEBa1	3	5	4	11	2	2	3	3	7	41	8	6	6	3	11	6	34	317	B. abortus bv3	Cattle	Kenya	2009
2011Muendo#09	1284	9-KEBa1	3	5	4	11	2	2	3	3	7	41	8	6	6	3	11	6	34	317	B. abortus bv3	Cattle	Kenya	2009
2011Muendo#10	1285	10-KEBa1	3	5	4	11	2	2	3	3	7	41	8	6	6	3	11	6	34	317	B. abortus bv3	Cattle	Kenya	2009
2018Vergnaud#0179	3349	BCCN#03-33	3	5	4	11	2	2	3	3	8	41	8	6	8	3	5	7	34	64	B. abortus bv3	Human	Mauritania	2003
2006LeFleche#119	119	BCCN#99-98	4	5	3	12	2	2	3	1	6	43	8	5	6	4	3	3	36	72	B. abortus bv7	Cattle	Mongolia	1999
2018Vergnaud#0111	3281	BCCN#99-98	4	5	3	12	2	2	3	1	6	43	8	5	6	4	3	3	36	72	B. abortus bv7	Cattle	Mongolia	1999
2018Vergnaud#0135	3305	BCCN#99-99	4	5	3	12	2	2	3	1	6	43	8	5	6	4	3	3	36	72	B. abortus bv7	Cattle	Mongolia	1999
2018Vergnaud#0246	3416	BCCN#83-20	3	5	3	11	2	2	3	3	8	41	8	6	2	3	5	5	134	313	B. abortus bv3	Cattle	Niger	1983
2018Vergnaud#0247	3417	BCCN#83-233	3	5	3	11	2	2	3	3	8	41	8	6	2	3	5	5	134	313	B. abortus bv3	Cattle	Niger	1983
2018Vergnaud#0248	3418	BCCN#83-234	3	5	3	11	2	2	3	3	8	41	8	6	2	3	5	5	134	313	B. abortus bv3	Cattle	Niger	1983
2012Ferreira#146	1441	LNIV-328Ba3-06	4	5	3	12	2	2	3	1	6	43	8	4	7	7	3	3	36	72	B. abortus bv3	Cattle	Portugal	2006
2012Ferreira#147	1442	LNIV-316Ba3-06	4	5	3	12	2	2	3	1	6	43	8	4	7	5	3	3	36	72	B. abortus bv3	Cattle	Portugal	2006
2012Ferreira#148	1443	LNIV-318Ba3-06	4	5	3	12	2	2	3	1	6	43	8	4	7	5	3	3	36	72	B. abortus bv3	Cattle	Portugal	2006
2012Ferreira#149	1444	LNIV-320Ba3-06	4	5	3	12	2	2	3	1	6	43	8	4	7	6	3	3	36	72	B. abortus bv3	Cattle	Portugal	2006
2012Ferreira#150	1445	LNIV-375Ba3-07	4	5	3	12	2	2	3	1	6	43	8	4	7	6	3	3	36	72	B. abortus bv3	Cattle	Portugal	2007
2012Ferreira#151	1446	LNIV-376Ba3-07	4	5	3	12	2	2	3	1	6	43	8	4	7	6	3	3	36	72	B. abortus bv3	Cattle	Portugal	2007
2012Ferreira#152	1447	LNIV-109Ba3-03	4	5	3	12	2	2	3	1	6	43	8	4	6	6	3	3	36	72	B. abortus bv3	Cattle	Portugal	2003
2012Ferreira#153	1448	LNIV-120Ba3-03	4	5	3	12	2	2	3	1	6	43	8	4	6	6	3	3	36	72	B. abortus bv3	Cattle	Portugal	2003
2012Ferreira#154	1449	LNIV-141Ba3-04	4	5	3	12	2	2	3	1	6	43	8	4	6	6	3	3	36	72	B. abortus bv3	Cattle	Portugal	2004
2012Ferreira#155	1450	LNIV-181Ba3-04	4	5	3	12	2	2	3	1	6	43	8	4	5	6	4	3	36	72	B. abortus bv3	Cattle	Portugal	2004
2012Ferreira#156	1451	LNIV-329Ba3-07	4	5	3	12	2	2	3	1	6	43	8	4	5	6	4	3	36	72	B. abortus bv3	Cattle	Portugal	2007
2012Ferreira#157	1452	LNIV-77Ba3-03	4	5	3	12	2	2	3	1	6	43	8	4	5	6	4	3	36	72	B. abortus bv3	Cattle	Portugal	2003
2012Ferreira#158	1453	LNIV-370Ba3-07	4	5	3	12	2	2	3	1	6	43	8	4	5	6	5	3	36	72	B. abortus bv3	Cattle	Portugal	2007
2012Ferreira#159	1454	LNIV-371Ba3-07	4	5	3	12	2	2	3	1	6	43	8	4	7	5	3	3	36	72	B. abortus bv3	Cattle	Portugal	2007
2012Ferreira#160	1455	LNIV-P22Ba3/03	4	5	3	12	2	2	3	1	6	43	8	4	5	0	5	3	36	72	B. abortus bv3	Cattle	Portugal	2003
2012Ferreira#161	1456	LNIV-P23Ba3/03	4	5	3	12	2	2	3	1	6	43	8	4	5	8	5	3	36	72	B. abortus bv3	Cattle	Portugal	2003
2012Ferreira#162	1457	LNIV-P24Ba3/04	4	5	3	12	2	2	3	1	6	43	8	4	5	6	4	3	36	72	B. abortus bv3	Cattle	Portugal	2004
2012Ferreira#163	1458	LNIV-122Ba3-03	4	5	3	12	2	2	3	1	6	43	8	4	5	5	4	3	36	72	B. abortus bv3	Cattle	Portugal	2003
2012Ferreira#164	1459	LNIV-130Ba3-03	4	5	3	12	2	2	3	1	6	43	8	4	6	6	3	3	36	72	B. abortus bv3	Cattle	Portugal	2003
2012Ferreira#165	1460	LNIV-P25Ba3/04	4	5	3	12	2	2	3	1	6	43	8	4	5	6	4	3	36	72	B. abortus bv3	Cattle	Portugal	2004
2012Ferreira#166	1461	LNIV-P26Ba3/04	4	5	3	12	2	2	3	1	6	43	8	4	5	6	4	3	36	72	B. abortus bv3	Cattle	Portugal	2004
2012Ferreira#167	1462	LNIV-P27Ba3/03	4	5	3	12	2	2	3	1	6	43	8	4	5	8	5	3	36	72	B. abortus bv3	Cattle	Portugal	2003
2012Ferreira#168	1463	LNIV-2Ba3-01	4	5	3	12	2	2	3	1	6	43	8	4	5	12	4	3	36	72	B. abortus bv3	Cattle	Portugal	2001
2012Ferreira#169	1464	LNIV-3Ba3-01	4	5	3	12	2	2	3	1	6	43	8	4	7	12	4	3	36	72	B. abortus bv3	Cattle	Portugal	2001
2012Ferreira#170	1465	LNIV-P30Ba3/04	4	5	3	12	2	2	3	1	6	43	8	4	5	6	4	3	36	72	B. abortus bv3	Cattle	Portugal	2004
2012Ferreira#171	1466	LNIV-P31Ba3/03	4	5	3	12	2	2	3	1	6	43	8	4	5	6	4	3	36	72	B. abortus bv3	Cattle	Portugal	2003
2012Ferreira#172	1467	LNIV-P32Ba3/03	4	5	3	12	2	2	3	1	6	43	8	4	5	6	4	3	36	72	B. abortus bv3	Cattle	Portugal	2003
2012Ferreira#173	1468	LNIV-P35Ba3/04	4	5	3	12	2	2	3	1	6	43	8	4	5	6	4	3	36	72	B. abortus bv3	Cattle	Portugal	2004
2012Ferreira#145	1440	LNIV-444Ba1-07	3	5	4	12	2	2	3	3	6	43	8	3	4	3	4	5	33	76	B. abortus bv1	Cattle	Portugal	2007
2012Ferreira#298	1593	RB51_LNIV-383RB51-07	4	5	4	12	2	3	3	3	6	43	8	3	7	3	3	5	27	79	B. abortus Rough	Cattle	Portugal	2007
2012Ferreira#299	1594	RB51_LNIV-296RB51-05	4	5	4	12	2	3	3	3	6	43	8	3	7	3	3	5	27	79	B. abortus Rough	Cattle	Portugal	2005
2012Ferreira#225	1520	LNIV-293Ba1-05	4	5	4	12	2	2	3	3	6	43	8	3	4	3	4	5	28	82	B. abortus bv1	Cattle	Portugal	2005
2012Ferreira#226	1521	LNIV-294Ba1-05	4	5	4	12	2	2	3	3	6	43	8	3	4	3	4	5	28	82	B. abortus bv1	Cattle	Portugal	2005
2012Ferreira#227	1522	LNIV-295Ba1-05	4	5	4	12	2	2	3	3	6	43	8	3	4	3	4	5	28	82	B. abortus bv1	Cattle	Portugal	2005
2012Ferreira#228	1523	LNIV-94Ba1-03	4	5	4	12	2	2	3	3	6	43	8	3	4	3	4	5	28	82	B. abortus bv1	Cattle	Portugal	2003
2012Ferreira#229	1524	LNIV-212Ba1-04	4	5	4	12	2	2	3	3	6	43	8	3	4	3	4	5	28	82	B. abortus bv1	Cattle	Portugal	2004
2012Ferreira#230	1525	LNIV-352Ba1-07	4	5	4	12	2	2	3	3	6	43	8	3	4	3	4	5	28	82	B. abortus bv1	Cattle	Portugal	2007
2012Ferreira#231	1526	LNIV-353Ba1-07	4	5	4	12	2	2	3	3	6	43	8	3	4	3	4	5	28	82	B. abortus bv1	Cattle	Portugal	2007
2012Ferreira#232	1527	LNIV-235Ba1-05	4	5	4	12	2	2	3	3	6	43	8	3	4	3	4	5	28	82	B. abortus bv1	Cattle	Portugal	2005
2012Ferreira#233	1528	LNIV-359Ba1-07	4	5	4	12	2	2	3	3	6	43	8	3	4	3	4	5	28	82	B. abortus bv1	Cattle	Portugal	2007
2012Ferreira#234	1529	LNIV-360Ba1-07	4	5	4	12	2	2	3	3	6	43	8	3	4	3	4	5	28	82	B. abortus bv1	Cattle	Portugal	2007
2012Ferreira#235	1530	LNIV-361Ba1-07	4	5	4	12	2	2	3	3	6	43	8	3	4	3	4	5	28	82	B. abortus bv1	Cattle	Portugal	2007
2012Ferreira#236	1531	LNIV-364Ba1-07	4	5	4	12	2	2	3	3	6	43	8	3	4	3	4	5	28	82	B. abortus bv1	Cattle	Portugal	2007
2012Ferreira#237	1532	LNIV-365Ba1-07	4	5	4	12	2	2	3	3	6	43	8	3	4	3	4	5	28	82	B. abortus bv1	Cattle	Portugal	2007
2012Ferreira#238	1533	LNIV-366Ba1-07	4	5	4	12	2	2	3	3	6	43	8	3	4	3	4	5	28	82	B. abortus bv1	Cattle	Portugal	2007
2012Ferreira#239	1534	LNIV-367Ba1-07	4	5	4	12	2	2	3	3	6	43	8	3	4	3	4	5	28	82	B. abortus bv1	Cattle	Portugal	2007
2012Ferreira#240	1535	LNIV-368Ba1-07	4	5	4	12	2	2	3	3	6	43	8	3	4	3	4	5	28	82	B. abortus bv1	Cattle	Portugal	2007
2012Ferreira#241	1536	LNIV-372Ba1-07	4	5	4	12	2	2	3	3	6	43	8	3	4	3	4	6	28	82	B. abortus bv1	Cattle	Portugal	2007
2012Ferreira#242	1537	LNIV-374Ba1-07	4	5	4	12	2	2	3	3	6	43	8	3	4	3	4	5	28	82	B. abortus bv1	Cattle	Portugal	2007
2012Ferreira#243	1538	LNIV-380Ba1-07	4	5	4	12	2	2	3	3	6	43	8	3	4	3	4	5	28	82	B. abortus bv1	Cattle	Portugal	2007
2012Ferreira#244	1539	LNIV-382Ba1-07	4	5	4	12	2	2	3	3	6	43	8	3	4	3	4	5	28	82	B. abortus bv1	Cattle	Portugal	2007
2012Ferreira#245	1540	LNIV-378Ba1-07	4	5	4	12	2	2	3	3	6	43	8	3	4	3	4	6	28	82	B. abortus bv1	Cattle	Portugal	2007
2012Ferreira#246	1541	LNIV-379Ba1-07	4	5	4	12	2	2	3	3	6	43	8	3	4	3	4	5	28	82	B. abortus bv1	Cattle	Portugal	2007
2012Ferreira#247	1542	LNIV-389Ba1-07	4	5	4	12	2	2	3	3	6	43	8	3	4	3	4	5	28	82	B. abortus bv1	Cattle	Portugal	2007
2012Ferreira#223	1518	LNIV-18Ba1-01	4	5	4	12	2	2	3	3	6	43	8	3	5	3	3	5	28	82	B. abortus bv1	Cattle	Portugal	2001
2012Ferreira#224	1519	LNIV-20Ba1-01	4	5	4	12	2	2	3	3	6	43	8	3	5	3	3	5	28	82	B. abortus bv1	Cattle	Portugal	2001
2012Ferreira#248	1543	LNIV-243Ba1-05	4	5	4	12	2	2	3	3	6	43	8	3	4	3	4	6	28	82	B. abortus bv1	Cattle	Portugal	2005
2012Ferreira#249	1544	LNIV-246Ba1-05	4	5	4	12	2	2	3	3	6	43	8	3	4	3	4	6	28	82	B. abortus bv1	Cattle	Portugal	2005
2012Ferreira#250	1545	LNIV-385Ba1-07	4	5	4	12	2	2	3	3	6	43	8	3	4	3	4	7	28	82	B. abortus bv1	Cattle	Portugal	2007
2012Ferreira#251	1546	LNIV-DNA181Ba1-08	4	5	4	12	2	2	3	3	6	43	8	3	4	3	4	6	28	82	B. abortus bv1	Cattle	Portugal	2008
2012Ferreira#252	1547	LNIV-DNA182Ba1-08	4	5	4	12	2	2	3	3	6	43	8	3	4	3	4	6	28	82	B. abortus bv1	Cattle	Portugal	2008
2012Ferreira#253	1548	LNIV-DNA183Ba1-08	4	5	4	12	2	2	3	3	6	43	8	3	4	3	4	6	28	82	B. abortus bv1	Cattle	Portugal	2008
2012Ferreira#254	1549	LNIV-DNA184Ba1-08	4	5	4	12	2	2	3	3	6	43	8	3	4	3	4	6	28	82	B. abortus bv1	Cattle	Portugal	2008
2012Ferreira#255	1550	LNIV-P3Ba1/03	4	5	4	12	2	2	3	3	6	43	8	3	4	3	4	5	28	82	B. abortus bv1	Cattle	Portugal	2003
2012Ferreira#256	1551	LNIV-240Ba1-05	4	5	4	12	2	2	3	3	6	43	8	3	4	3	4	5	28	82	B. abortus bv1	Cattle	Portugal	2005
2012Ferreira#257	1552	LNIV-358Ba1-07	4	5	4	12	2	2	3	3	6	43	8	3	4	3	4	5	28	82	B. abortus bv1	Cattle	Portugal	2007
2012Ferreira#258	1553	LNIV-363Ba1-07	4	5	4	12	2	2	3	3	6	43	8	3	4	3	4	5	28	82	B. abortus bv1	Cattle	Portugal	2007
2012Ferreira#259	1554	LNIV-369Ba1-07	4	5	4	12	2	2	3	3	6	43	8	3	4	3	4	5	28	82	B. abortus bv1	Cattle	Portugal	2007
2012Ferreira#260	1555	LNIV-381Ba1-07	4	5	4	12	2	2	3	3	6	43	8	3	4	3	4	5	28	82	B. abortus bv1	Cattle	Portugal	2007
2012Ferreira#261	1556	LNIV-357Ba1-07	4	5	4	12	2	2	3	3	6	43	8	3	4	3	4	5	28	82	B. abortus bv1	Cattle	Portugal	2007
2012Ferreira#262	1557	LNIV-384Ba1-07	4	5	4	12	2	2	3	3	6	43	8	3	4	3	4	5	28	82	B. abortus bv1	Cattle	Portugal	2007
2012Ferreira#263	1558	LNIV-28Ba1-02	4	5	4	12	2	2	3	3	6	43	8	3	4	3	4	5	28	82	B. abortus bv1	Cattle	Portugal	2002
2012Ferreira#264	1559	LNIV-140Ba1-04	4	5	4	12	2	2	3	3	6	43	8	3	4	3	4	5	28	82	B. abortus bv1	Cattle	Portugal	2004
2012Ferreira#265	1560	LNIV-411Ba1-07	4	5	4	12	2	2	3	3	6	43	8	3	4	3	4	5	28	82	B. abortus bv1	Cattle	Portugal	2007
2012Ferreira#266	1561	LNIV-412Ba1-07	4	5	4	12	2	2	3	3	6	43	8	3	4	3	6	6	28	82	B. abortus bv1	Cattle	Portugal	2007
2012Ferreira#267	1562	LNIV-413Ba1-07	4	5	4	12	2	2	3	3	6	43	8	3	4	3	6	5	28	82	B. abortus bv1	Cattle	Portugal	2007
2012Ferreira#268	1563	LNIV-416Ba1-07	4	5	4	12	2	2	3	3	6	43	8	3	5	3	4	5	28	82	B. abortus bv1	Cattle	Portugal	2007
2012Ferreira#269	1564	LNIV-417Ba1-07	4	5	4	12	2	2	3	3	6	43	8	3	4	3	4	5	28	82	B. abortus bv1	Cattle	Portugal	2007
2012Ferreira#270	1565	LNIV-418Ba1-07	4	5	4	12	2	2	3	3	6	43	8	3	4	3	4	6	28	82	B. abortus bv1	Cattle	Portugal	2007
2012Ferreira#271	1566	LNIV-419Ba1-07	4	5	4	12	2	2	3	3	6	43	8	3	4	3	4	5	28	82	B. abortus bv1	Cattle	Portugal	2007
2012Ferreira#272	1567	LNIV-420Ba1-07	4	5	4	12	2	2	3	3	6	43	8	3	4	3	4	5	28	82	B. abortus bv1	Cattle	Portugal	2007
2012Ferreira#273	1568	LNIV-422Ba1-07	4	5	4	12	2	2	3	3	6	43	8	3	5	3	4	5	28	82	B. abortus bv1	Cattle	Portugal	2007
2012Ferreira#274	1569	LNIV-423Ba1-07	4	5	4	12	2	2	3	3	6	43	8	3	4	3	6	5	28	82	B. abortus bv1	Cattle	Portugal	2007
2012Ferreira#275	1570	LNIV-424Ba1-07	4	5	4	12	2	2	3	3	6	43	8	3	4	3	4	5	28	82	B. abortus bv1	Cattle	Portugal	2007
2012Ferreira#276	1571	LNIV-425Ba1-07	4	5	4	12	2	2	3	3	6	43	8	3	4	3	4	5	28	82	B. abortus bv1	Cattle	Portugal	2007
2012Ferreira#277	1572	LNIV-426Ba1-07	4	5	4	12	2	2	3	3	6	43	8	3	4	3	6	5	28	82	B. abortus bv1	Cattle	Portugal	2007
2012Ferreira#278	1573	LNIV-427Ba1-07	4	5	4	12	2	2	3	3	6	43	8	3	5	3	4	5	28	82	B. abortus bv1	Cattle	Portugal	2007
2012Ferreira#279	1574	LNIV-428Ba1-07	4	5	4	12	2	2	3	3	6	43	8	3	4	3	4	5	28	82	B. abortus bv1	Cattle	Portugal	2007
2012Ferreira#280	1575	LNIV-429Ba1-07	4	5	4	12	2	2	3	3	6	43	8	3	4	3	4	6	28	82	B. abortus bv1	Cattle	Portugal	2007
2012Ferreira#281	1576	LNIV-430Ba1-07	4	5	4	12	2	2	3	3	6	43	8	3	4	3	4	6	28	82	B. abortus bv1	Cattle	Portugal	2007
2012Ferreira#282	1577	LNIV-432Ba1-07	4	5	4	12	2	2	3	3	6	43	8	3	5	3	4	5	28	82	B. abortus bv1	Cattle	Portugal	2007
2012Ferreira#283	1578	LNIV-433Ba1-07	4	5	4	12	2	2	3	3	6	43	8	3	4	3	4	6	28	82	B. abortus bv1	Cattle	Portugal	2007
2012Ferreira#284	1579	LNIV-434Ba1-07	4	5	4	12	2	2	3	3	6	43	8	3	4	3	6	5	28	82	B. abortus bv1	Cattle	Portugal	2007
2012Ferreira#285	1580	LNIV-440Ba1-07	4	5	4	12	2	2	3	3	6	43	8	3	4	3	4	6	28	82	B. abortus bv1	Cattle	Portugal	2007
2012Ferreira#286	1581	LNIV-441Ba1-07	4	5	4	12	2	2	3	3	6	43	8	3	4	3	5	4	28	82	B. abortus bv1	Cattle	Portugal	2007
2012Ferreira#287	1582	LNIV-436Ba1-07	4	5	4	12	2	2	3	3	6	43	8	3	4	3	6	5	28	82	B. abortus bv1	Cattle	Portugal	2007
2012Ferreira#288	1583	LNIV-437Ba1-07	4	5	4	12	2	2	3	3	6	43	8	3	4	3	6	5	28	82	B. abortus bv1	Cattle	Portugal	2007
2012Ferreira#289	1584	LNIV-438Ba1-07	4	5	4	12	2	2	3	3	6	43	8	3	4	3	4	5	28	82	B. abortus bv1	Cattle	Portugal	2007
2012Ferreira#290	1585	LNIV-439Ba1-07	4	5	4	12	2	2	3	3	6	43	8	3	4	3	4	5	28	82	B. abortus bv1	Cattle	Portugal	2007
2012Ferreira#291	1586	LNIV-442Ba1-07	4	5	4	12	2	2	3	3	6	43	8	3	4	3	4	0	28	82	B. abortus bv1	Cattle	Portugal	2007
2012Ferreira#292	1587	LNIV-443Ba1-07	4	5	4	12	2	2	3	3	6	43	8	3	4	3	4	6	28	82	B. abortus bv1	Cattle	Portugal	2007
2012Ferreira#293	1588	LNIV-445Ba1-07	4	5	4	12	2	2	3	3	6	43	8	3	4	3	4	5	28	82	B. abortus bv1	Cattle	Portugal	2007
2012Ferreira#294	1589	LNIV-446Ba1-07	4	5	4	12	2	2	3	3	6	43	8	3	5	3	4	5	28	82	B. abortus bv1	Cattle	Portugal	2007
2012Ferreira#295	1590	LNIV-P15Ba1/03	4	5	4	12	2	2	3	3	6	43	8	3	6	3	4	5	28	82	B. abortus bv1	Cattle	Portugal	2003
2012Ferreira#215	1510	LNIV-21Ba1-01	4	5	4	12	2	2	3	3	6	41	8	3	4	3	3	5	28	181	B. abortus bv1	Cattle	Portugal	2001
2012Ferreira#216	1511	LNIV-T242Ba1/02	4	5	4	12	2	2	3	3	6	41	8	3	4	3	3	6	28	181	B. abortus bv1	Cattle	Portugal	2002
2012Ferreira#217	1512	LNIV-T243Ba1/02	4	5	4	12	2	2	3	3	6	41	8	3	4	3	3	5	28	181	B. abortus bv1	Cattle	Portugal	2002
2012Ferreira#218	1513	LNIV-T244Ba1/02	4	5	4	12	2	2	3	3	6	41	8	3	4	3	3	5	28	181	B. abortus bv1	Cattle	Portugal	2002
2012Ferreira#219	1514	LNIV-T245Ba1/02	4	5	4	12	2	2	3	3	6	41	8	3	4	3	3	5	28	181	B. abortus bv1	Cattle	Portugal	2002
2012Ferreira#220	1515	LNIV-T246Ba3/02	4	5	4	12	2	2	3	3	6	41	8	3	4	3	3	5	28	181	B. abortus bv1	Cattle	Portugal	2002
2012Ferreira#221	1516	LNIV-T247Ba1/02	4	5	4	12	2	2	3	3	6	41	8	3	5	3	3	5	28	181	B. abortus bv1	Cattle	Portugal	2002
2012Ferreira#222	1517	LNIV-T248Ba1/02	4	5	4	12	2	2	3	3	6	41	8	3	4	3	3	5	28	181	B. abortus bv1	Cattle	Portugal	2002
2012Ferreira#178	1473	LNIV-362Ba1-07	4	5	4	12	1	2	3	3	6	43	8	3	4	3	4	5	32	182	B. abortus bv1	Cattle	Portugal	2007
2012Ferreira#179	1474	LNIV-373Ba1-07	4	5	4	12	1	2	3	3	6	43	8	3	4	3	4	5	32	182	B. abortus bv1	Cattle	Portugal	2007
2012Ferreira#174	1469	LNIV-15Ba1-01	4	5	4	12	1	2	3	3	6	43	8	4	4	3	3	6	32	182	B. abortus bv1	Cattle	Portugal	2001
2012Ferreira#175	1470	LNIV-16Ba1-01	4	5	4	12	1	2	3	3	6	43	8	4	4	3	3	6	32	182	B. abortus bv1	Cattle	Portugal	2001
2012Ferreira#176	1471	LNIV-17Ba1-01	4	5	4	12	1	2	3	3	6	43	8	4	4	3	3	6	32	182	B. abortus bv1	Cattle	Portugal	2001
2012Ferreira#177	1472	LNIV-19Ba1-01	4	5	4	12	1	2	3	3	6	43	8	4	4	3	3	6	32	182	B. abortus bv1	Cattle	Portugal	2001
2012Ferreira#180	1475	LNIV-P4Ba1/04	4	5	4	12	1	2	3	3	6	43	8	4	4	3	5	4	32	182	B. abortus bv1	Cattle	Portugal	2004
2012Ferreira#181	1476	LNIV-P5Ba1/04	4	5	4	12	1	2	3	3	6	43	8	5	4	3	5	4	32	182	B. abortus bv1	Cattle	Portugal	2004
2012Ferreira#182	1477	LNIV-P10Ba1/04	4	5	4	12	1	2	3	3	6	43	8	4	4	3	5	4	32	182	B. abortus bv1	Cattle	Portugal	2004
2012Ferreira#183	1478	LNIV-P11Ba1/03	4	5	4	12	1	2	3	3	6	43	8	4	4	3	5	4	32	182	B. abortus bv1	Cattle	Portugal	2003
2012Ferreira#184	1479	LNIV-390Ba1-06	4	5	4	12	1	2	3	3	6	43	8	3	4	3	4	6	32	182	B. abortus bv1	Cattle	Portugal	2006
2012Ferreira#185	1480	LNIV-391Ba1-06	4	5	4	12	1	2	3	3	6	43	8	3	4	3	4	6	32	182	B. abortus bv1	Cattle	Portugal	2006
2012Ferreira#186	1481	LNIV-392Ba1-06	4	5	4	12	1	2	3	3	6	43	8	3	4	3	4	6	32	182	B. abortus bv1	Cattle	Portugal	2006
2012Ferreira#187	1482	LNIV-393Ba1-06	4	5	4	12	1	2	3	3	6	43	8	3	4	3	4	5	32	182	B. abortus bv1	Cattle	Portugal	2006
2012Ferreira#188	1483	LNIV-394Ba1-06	4	5	4	12	1	2	3	3	6	43	8	3	4	3	4	5	32	182	B. abortus bv1	Cattle	Portugal	2006
2012Ferreira#189	1484	LNIV-395Ba1-06	4	5	4	12	1	2	3	3	6	43	8	3	4	3	5	5	32	182	B. abortus bv1	Cattle	Portugal	2006
2012Ferreira#190	1485	LNIV-396Ba1-06	4	5	4	12	1	2	3	3	6	43	8	3	4	3	5	5	32	182	B. abortus bv1	Cattle	Portugal	2006
2012Ferreira#191	1486	LNIV-397Ba1-06	4	5	4	12	1	2	3	3	6	43	8	3	4	3	4	5	32	182	B. abortus bv1	Cattle	Portugal	2006
2012Ferreira#192	1487	LNIV-398Ba1-06	4	5	4	12	1	2	3	3	6	43	8	3	4	3	4	5	32	182	B. abortus bv1	Cattle	Portugal	2006
2012Ferreira#193	1488	LNIV-400Ba1-06	4	5	4	12	1	2	3	3	6	43	8	3	4	3	4	5	32	182	B. abortus bv1	Cattle	Portugal	2006
2012Ferreira#194	1489	LNIV-401Ba1-06	4	5	4	12	1	2	3	3	6	43	8	3	4	3	4	5	32	182	B. abortus bv1	Cattle	Portugal	2006
2012Ferreira#195	1490	LNIV-402Ba1-96	4	5	4	12	1	2	3	3	6	43	8	3	4	3	5	5	32	182	B. abortus bv1	Cattle	Portugal	2006
2012Ferreira#196	1491	LNIV-403Ba1-06	4	5	4	12	1	2	3	3	6	43	8	3	4	3	4	6	32	182	B. abortus bv1	Cattle	Portugal	2006
2012Ferreira#197	1492	LNIV-404Ba1-06	4	5	4	12	1	2	3	3	6	43	8	3	4	3	4	5	32	182	B. abortus bv1	Cattle	Portugal	2006
2012Ferreira#198	1493	LNIV-405Ba1-06	4	5	4	12	1	2	3	3	6	43	8	3	4	3	4	5	32	182	B. abortus bv1	Cattle	Portugal	2006
2012Ferreira#199	1494	LNIV-406Ba1-06	4	5	4	12	1	2	3	3	6	43	8	3	4	3	4	5	32	182	B. abortus bv1	Cattle	Portugal	2006
2012Ferreira#200	1495	LNIV-407Ba1-06	4	5	4	12	1	2	3	3	6	43	8	3	4	3	4	5	32	182	B. abortus bv1	Cattle	Portugal	2006
2012Ferreira#201	1496	LNIV-408Ba1-07	4	5	4	12	1	2	3	3	6	43	8	3	4	3	4	5	32	182	B. abortus bv1	Cattle	Portugal	2007
2012Ferreira#202	1497	LNIV-409Ba1-07	4	5	4	12	1	2	3	3	6	43	8	3	4	3	4	5	32	182	B. abortus bv1	Cattle	Portugal	2007
2012Ferreira#203	1498	LNIV-431Ba1-07	4	5	4	12	1	2	3	3	6	43	8	3	4	3	4	5	32	182	B. abortus bv1	Cattle	Portugal	2007
2012Ferreira#204	1499	LNIV-435Ba1-07	4	5	4	12	1	2	3	3	6	43	8	3	4	3	4	5	32	182	B. abortus bv1	Cattle	Portugal	2007
2012Ferreira#205	1500	LNIV-414Ba1-07	4	5	4	12	1	2	3	3	6	43	8	3	4	3	5	5	32	182	B. abortus bv1	Cattle	Portugal	2007
2012Ferreira#206	1501	LNIV-415Ba1-07	4	5	4	12	1	2	3	3	6	43	8	3	4	3	5	5	32	182	B. abortus bv1	Cattle	Portugal	2007
2012Ferreira#207	1502	LNIV-421Ba1-07	4	5	4	12	1	2	3	3	6	43	8	3	4	3	4	5	32	182	B. abortus bv1	Cattle	Portugal	2007
2012Ferreira#208	1503	LNIV-410Ba1-07	4	5	4	12	1	2	3	3	6	43	8	3	4	3	4	5	32	182	B. abortus bv1	Cattle	Portugal	2007
2012Ferreira#209	1504	LNIV-P12Ba1/04	4	5	4	12	1	2	3	3	6	43	8	5	4	3	5	4	32	182	B. abortus bv1	Cattle	Portugal	2004
2012Ferreira#210	1505	LNIV-P13Ba1/04	4	5	4	12	1	2	3	3	6	43	8	5	4	3	5	4	32	182	B. abortus bv1	Cattle	Portugal	2004
2012Ferreira#211	1506	LNIV-P14Ba1/03	4	5	4	12	1	2	3	3	6	43	8	4	4	3	5	4	32	182	B. abortus bv1	Cattle	Portugal	2003
2012Ferreira#137	1432	LNIV-P1Ba1/04	3	5	4	12	1	2	3	3	6	43	8	5	4	3	0	4	98	183	B. abortus bv1	Cattle	Portugal	2004
2012Ferreira#138	1433	LNIV-P2Ba1/03	3	5	4	12	1	2	3	3	6	43	8	5	4	3	5	4	98	183	B. abortus bv1	Cattle	Portugal	2003
2012Ferreira#139	1434	LNIV-P38Ba1/04	3	5	4	12	1	2	3	3	6	43	8	5	4	3	5	5	98	183	B. abortus bv1	Cattle	Portugal	2004
2012Ferreira#140	1435	LNIV-P6Ba1/04	3	5	4	12	1	2	3	3	6	43	8	4	4	3	5	4	98	183	B. abortus bv1	Cattle	Portugal	2004
2012Ferreira#141	1436	LNIV-P7Ba1/04	3	5	4	12	1	2	3	3	6	43	8	5	4	3	6	4	98	183	B. abortus bv1	Cattle	Portugal	2004
2012Ferreira#142	1437	LNIV-P8Ba1/04	3	5	4	12	1	2	3	3	6	43	8	4	4	3	6	4	98	183	B. abortus bv1	Cattle	Portugal	2004
2012Ferreira#143	1438	LNIV-P9Ba1/03	3	5	4	12	1	2	3	3	6	43	8	5	4	3	5	4	98	183	B. abortus bv1	Cattle	Portugal	2003
2012Ferreira#144	1439	LNIV-4Ba1-01	3	5	4	12	1	2	3	3	6	43	8	4	4	3	8	4	98	183	B. abortus bv1	Cattle	Portugal	2001
2012Ferreira#302	1597	LNIV-399Ba1-06	4	5	4	13	1	2	3	3	6	43	8	3	4	3	3	6	99	184	B. abortus bv1	Cattle	Portugal	2006
2018Vergnaud#0307	3477	BCCN#82-21	3	5	4	11	2	2	3	3	7	41	8	6	5	3	10	4	34	317	B. abortus bv3	Cattle	Rwanda	1982
2018Vergnaud#0268	3438	BCCN#83-14	3	5	4	11	2	2	3	3	7	41	8	4	5	3	6	4	34	317	B. abortus bv3	Cattle	Rwanda	1983
2018Vergnaud#0269	3439	BCCN#83-15	3	5	4	11	2	2	3	3	7	41	8	5	8	4	4	4	34	317	B. abortus bv3	Cattle	Rwanda	1983
2018Vergnaud#0270	3440	BCCN#83-16	3	5	4	11	2	2	3	3	7	41	8	5	7	3	6	4	34	317	B. abortus bv3	Cattle	Rwanda	1983
2018Vergnaud#0271	3441	BCCN#83-17	3	5	4	11	2	2	3	3	7	41	8	5	6	3	5	4	34	317	B. abortus bv3	Cattle	Rwanda	1983
2018Vergnaud#0272	3442	BCCN#83-18	3	5	4	11	2	2	3	3	7	41	8	5	6	3	5	4	34	317	B. abortus bv3	Cattle	Rwanda	1983
2018Vergnaud#0273	3443	BCCN#83-19	3	5	4	11	2	2	3	3	7	41	8	5	6	3	5	4	34	317	B. abortus bv3	Cattle	Rwanda	1983
2018Vergnaud#0274	3444	BCCN#83-227	3	5	4	11	2	2	3	3	7	41	8	6	5	3	9	4	34	317	B. abortus bv3	Cattle	Rwanda	1983
2018Vergnaud#0275	3445	BCCN#83-228	3	5	4	11	2	2	3	3	7	41	8	5	6	3	4	4	34	317	B. abortus bv3	Cattle	Rwanda	1983
2018Vergnaud#0276	3446	BCCN#83-230	3	5	4	11	2	2	3	3	7	41	8	5	6	3	4	4	34	317	B. abortus bv3	Cattle	Rwanda	1983
2018Vergnaud#0277	3447	BCCN#83-232	3	5	4	11	2	2	3	3	7	41	8	5	8	3	9	4	34	317	B. abortus bv3	Cattle	Rwanda	1983
2018Vergnaud#0308	3478	BCCN#82-27	3	5	4	11	2	2	3	3	7	41	8	7	5	3	6	4	34	317	B. abortus bv3	Human	Rwanda	1982
2018Vergnaud#0309	3479	BCCN#83-231	3	5	4	11	2	2	3	3	7	41	8	5	6	3	4	4	34	317	B. abortus bv3	Cattle	Rwanda	1983
2018Vergnaud#0312	3482	BCCN#83-229	3	5	4	11	2	2	3	3	7	41	8	5	6	3	4	4	34	317	B. abortus bv3	Cattle	Rwanda	1983
2018Vergnaud#0197	3367	BCCN#78-143	2	3	6	10	4	1	5	2	4	38	9	5	7	7	6	3	6	33	B. abortus bv3	Cattle	Senegal	1978
2018Vergnaud#0178	3348	BCCN#77-179	3	5	4	11	2	2	3	3	6	41	8	4	5	3	5	7	34	63	B. abortus bv1	Cattle	Senegal	1977
2018Vergnaud#0751	3921	BCCN#77-182	3	5	4	11	2	2	3	3	6	41	8	4	5	3	5	7	34	63	B. abortus bv3	Cattle	Senegal	1977
2018Vergnaud#1220	4390	BCCN#77-177	3	5	4	11	2	2	3	3	6	41	8	4	5	3	5	7	34	63	B. abortus bv3	Cattle	Senegal	1977
2018Vergnaud#1221	4391	BCCN#77-178	3	5	4	11	2	2	3	3	6	41	8	4	5	3	5	7	34	63	B. abortus bv3	Cattle	Senegal	1977
2018Vergnaud#0389	3559	BCCN#79-98	3	5	4	11	2	2	3	3	6	41	8	4	5	6	5	6	34	63	B. abortus bv3	Cattle	Senegal	1979
2018Vergnaud#0336	3506	BCCN#78-18	3	5	4	11	2	2	3	3	8	41	8	4	5	3	5	5	34	64	B. abortus bv3	Cattle	Senegal	1978
2018Vergnaud#0183	3353	BCCN#76-402	3	5	4	11	2	2	3	3	8	41	8	4	5	3	4	6	34	64	B. abortus bv3	Cattle	Senegal	1976
2018Vergnaud#0322	3492	BCCN#76-392	3	5	4	11	2	2	3	3	8	41	8	4	5	3	5	5	34	64	B. abortus bv3	Cattle	Senegal	1976
2018Vergnaud#0780	3950	BCCN#76-394	3	5	4	11	2	2	3	3	8	41	8	4	5	3	4	6	34	64	B. abortus bv3	Cattle	Senegal	1976
2018Vergnaud#0781	3951	BCCN#76-395	3	5	4	11	2	2	3	3	8	41	8	4	5	3	4	6	34	64	B. abortus bv3	Cattle	Senegal	1976
2018Vergnaud#1049	4219	BCCN#76-396	3	5	4	11	2	2	3	3	8	41	8	4	5	3	4	6	34	64	B. abortus bv3	Cattle	Senegal	1976
2018Vergnaud#1050	4220	BCCN#76-397	3	5	4	11	2	2	3	3	8	41	8	4	5	3	4	6	34	64	B. abortus bv3	Cattle	Senegal	1976
2018Vergnaud#1051	4221	BCCN#76-400	3	5	4	11	2	2	3	3	8	41	8	4	5	3	5	5	34	64	B. abortus bv3	Cattle	Senegal	1976
2018Vergnaud#1052	4222	BCCN#76-401	3	5	4	11	2	2	3	3	8	41	8	4	5	3	4	6	34	64	B. abortus bv3	Cattle	Senegal	1976
2018Vergnaud#0190	3360	BCCN#77-58	3	5	4	11	2	2	3	3	8	41	8	4	6	3	5	6	34	64	B. abortus bv3	Cattle	Senegal	1977
2018Vergnaud#1230	4400	BCCN#78-28	3	5	4	11	2	2	3	3	8	41	8	4	5	3	6	5	34	64	B. abortus bv3	Cattle	Senegal	1978
2018Vergnaud#1228	4398	BCCN#77-33	3	5	4	11	2	2	3	3	8	41	8	5	5	3	5	6	34	64	B. abortus bv3	Cattle	Senegal	1977
2018Vergnaud#0756	3926	BCCN#77-42	3	5	4	11	2	2	3	3	8	41	8	4	6	3	6	5	34	64	B. abortus bv3	Cattle	Senegal	1977
2018Vergnaud#0760	3930	BCCN#78-50	3	5	4	11	2	2	3	3	8	41	8	4	6	3	7	5	34	64	B. abortus bv3	Cattle	Senegal	1978
2018Vergnaud#0792	3962	BCCN#78-51	3	5	4	11	2	2	3	3	8	41	8	4	6	3	7	5	34	64	B. abortus bv3	Cattle	Senegal	1978
2018Vergnaud#0793	3963	BCCN#78-52	3	5	4	11	2	2	3	3	8	41	8	4	6	3	8	5	34	64	B. abortus bv3	Cattle	Senegal	1978
2018Vergnaud#1232	4402	BCCN#78-53	3	5	4	11	2	2	3	3	8	41	8	4	6	3	7	5	34	64	B. abortus bv3	Cattle	Senegal	1978
2018Vergnaud#0782	3952	BCCN#77-12	3	5	4	11	2	2	3	3	8	41	8	4	6	3	5	5	34	64	B. abortus bv3	Cattle	Senegal	1977
2018Vergnaud#0202	3372	BCCN#78-55	3	5	4	11	2	2	3	3	8	41	8	4	6	3	7	5	34	64	B. abortus bv3	Cattle	Senegal	1978
2018Vergnaud#1233	4403	BCCN#78-54	3	5	4	11	2	2	3	3	8	41	8	4	6	3	7	5	34	64	B. abortus bv3	Cattle	Senegal	1978
2018Vergnaud#1361	4531	BCCN#78-56	3	5	4	11	2	2	3	3	8	41	8	4	6	3	7	5	34	64	B. abortus bv3	Cattle	Senegal	1978
2018Vergnaud#1362	4532	BCCN#78-57	3	5	4	11	2	2	3	3	8	41	8	4	6	3	7	5	34	64	B. abortus bv3	Cattle	Senegal	1978
2018Vergnaud#0754	3924	BCCN#77-203	3	5	4	11	2	2	3	3	8	41	8	6	7	3	7	3	34	64	B. abortus bv3	Cattle	Senegal	1977
2018Vergnaud#1056	4226	BCCN#77-187	3	5	4	11	2	2	3	3	8	41	8	6	7	3	8	3	34	64	B. abortus bv3	Cattle	Senegal	1977
2018Vergnaud#1341	4511	BCCN#77-188	3	5	4	11	2	2	3	3	8	41	8	6	7	3	6	3	34	64	B. abortus bv3	Cattle	Senegal	1977
2018Vergnaud#1342	4512	BCCN#77-189	3	5	4	11	2	2	3	3	8	41	8	4	6	3	4	5	34	64	B. abortus bv3	Cattle	Senegal	1977
2018Vergnaud#0788	3958	BCCN#78-21	3	5	4	11	2	2	3	3	8	41	8	4	6	3	6	5	34	64	B. abortus bv3	Cattle	Senegal	1978
2018Vergnaud#0783	3953	BCCN#77-13	3	5	4	11	2	2	3	3	8	41	8	4	5	3	6	6	34	64	B. abortus bv3	Cattle	Senegal	1977
2018Vergnaud#0192	3362	BCCN#77-70	3	5	4	11	2	2	3	3	8	41	8	5	5	3	4	7	34	64	B. abortus bv3	Cattle	Senegal	1977
2018Vergnaud#1351	4521	BCCN#77-69	3	5	4	11	2	2	3	3	8	41	8	5	5	3	4	7	34	64	B. abortus bv3	Cattle	Senegal	1977
2018Vergnaud#1352	4522	BCCN#77-71	3	5	4	11	2	2	3	3	8	41	8	5	5	3	4	7	34	64	B. abortus bv3	Cattle	Senegal	1977
2018Vergnaud#0785	3955	BCCN#77-205	3	5	4	11	2	2	3	3	8	41	8	5	7	3	7	3	34	64	B. abortus bv3	Cattle	Senegal	1977
2018Vergnaud#0327	3497	BCCN#77-207	3	5	4	11	2	2	3	3	8	41	8	4	6	3	4	5	34	64	B. abortus bv3	Cattle	Senegal	1977
2018Vergnaud#1054	4224	BCCN#77-16	3	5	4	11	2	2	3	3	8	41	8	4	6	3	5	5	34	64	B. abortus bv3	Cattle	Senegal	1977
2018Vergnaud#0334	3504	BCCN#78-142	3	5	4	11	2	2	3	3	8	41	8	4	5	3	5	7	34	64	B. abortus bv3	Cattle	Senegal	1978
2018Vergnaud#0321	3491	BCCN#76-315	3	5	4	11	2	2	3	3	8	41	8	4	5	3	5	6	34	64	B. abortus bv3	Cattle	Senegal	1976
2018Vergnaud#0794	3964	BCCN#79-157	3	5	4	11	2	2	3	3	8	41	8	4	5	3	5	5	34	64	B. abortus bv3	Cattle	Senegal	1979
2018Vergnaud#0796	3966	BCCN#79-164	3	5	4	11	2	2	3	3	8	41	8	4	5	3	4	6	34	64	B. abortus bv3	Cattle	Senegal	1979
2018Vergnaud#0799	3969	BCCN#79-172	3	5	4	11	2	2	3	3	8	41	8	4	5	3	4	6	34	64	B. abortus bv3	Cattle	Senegal	1979
2018Vergnaud#1063	4233	BCCN#79-162	3	5	4	11	2	2	3	3	8	41	8	4	5	3	4	7	34	64	B. abortus bv3	Cattle	Senegal	1979
2018Vergnaud#1235	4405	BCCN#79-169	3	5	4	11	2	2	3	3	8	41	8	4	5	3	5	8	34	64	B. abortus bv3	Cattle	Senegal	1979
2018Vergnaud#1236	4406	BCCN#79-173	3	5	4	11	2	2	3	3	8	41	8	4	5	3	4	6	34	64	B. abortus bv3	Cattle	Senegal	1979
2018Vergnaud#1348	4518	BCCN#77-56	3	5	4	11	2	2	3	3	8	41	8	5	5	3	5	7	34	64	B. abortus bv3	Cattle	Senegal	1977
2018Vergnaud#1227	4397	BCCN#77-32	3	5	4	11	2	2	3	3	8	41	8	4	5	3	4	3	34	64	B. abortus bv3	Cattle	Senegal	1977
2018Vergnaud#0198	3368	BCCN#78-32	3	5	4	11	2	2	3	3	8	41	8	4	5	3	4	6	34	64	B. abortus bv3	Cattle	Senegal	1978
2018Vergnaud#1356	4526	BCCN#78-31	3	5	4	11	2	2	3	3	8	41	8	4	5	3	4	6	34	64	B. abortus bv3	Cattle	Senegal	1978
2018Vergnaud#1357	4527	BCCN#78-33	3	5	4	11	2	2	3	3	8	41	8	4	5	3	4	6	34	64	B. abortus bv3	Cattle	Senegal	1978
2018Vergnaud#0337	3507	BCCN#78-69	3	5	4	11	2	2	2	3	7	41	8	4	5	3	3	7	137	310	B. abortus bv3	Cattle	Senegal	1978
2018Vergnaud#0187	3357	BCCN#77-27	3	5	4	11	3	2	2	3	9	41	8	4	6	3	5	6	142	311	B. abortus bv3	Cattle	Senegal	1977
2018Vergnaud#0186	3356	BCCN#77-19	3	5	4	11	3	2	2	3	7	41	8	4	7	8	3	5	142	312	B. abortus bv3	Cattle	Senegal	1977
2018Vergnaud#0180	3350	BCCN#77-192	2	5	4	11	2	2	3	3	7	41	8	5	7	3	5	7	139	314	B. abortus bv3	Cattle	Senegal	1977
2018Vergnaud#0791	3961	BCCN#78-39	3	5	4	11	2	2	3	3	10	41	8	5	6	3	8	6	34	315	B. abortus bv3	Cattle	Senegal	1978
2018Vergnaud#1359	4529	BCCN#78-41	3	5	4	11	2	2	3	3	10	41	8	5	6	3	8	6	34	315	B. abortus bv3	Cattle	Senegal	1978
2018Vergnaud#0199	3369	BCCN#78-37	3	5	4	11	2	2	3	3	10	41	8	5	6	3	9	6	34	315	B. abortus bv3	Cattle	Senegal	1978
2018Vergnaud#0790	3960	BCCN#78-38	3	5	4	11	2	2	3	3	10	41	8	5	6	3	8	6	34	315	B. abortus bv3	Cattle	Senegal	1978
2018Vergnaud#1057	4227	BCCN#77-36	3	5	4	11	2	2	3	3	10	41	8	7	6	3	6	6	34	315	B. abortus bv3	Cattle	Senegal	1977
2018Vergnaud#0182	3352	BCCN#76-393	3	5	4	11	2	2	3	3	9	41	8	4	5	3	5	5	34	316	B. abortus bv3	Cattle	Senegal	1976
2018Vergnaud#0184	3354	BCCN#76-411	3	5	4	11	2	2	3	3	9	41	8	4	6	8	5	7	34	316	B. abortus bv3	Cattle	Senegal	1976
2018Vergnaud#1355	4525	BCCN#78-27	3	5	4	11	2	2	3	3	9	41	8	4	5	3	8	5	34	316	B. abortus bv3	Cattle	Senegal	1978
2018Vergnaud#1350	4520	BCCN#77-67	3	5	4	11	2	2	3	3	9	41	8	4	5	3	4	5	34	316	B. abortus bv3	Cattle	Senegal	1977
2018Vergnaud#1353	4523	BCCN#77-72	3	5	4	11	2	2	3	3	9	41	8	4	5	3	4	7	34	316	B. abortus bv3	Cattle	Senegal	1977
2018Vergnaud#1345	4515	BCCN#77-29	3	5	4	11	2	2	3	3	9	41	8	4	6	3	5	6	34	316	B. abortus bv3	Cattle	Senegal	1977
2018Vergnaud#0200	3370	BCCN#78-42	3	5	4	11	2	2	3	3	9	41	8	5	6	3	8	6	34	316	B. abortus bv3	Cattle	Senegal	1978
2018Vergnaud#0747	3917	BCCN#76-317	3	5	4	11	2	2	3	3	9	41	8	4	5	3	5	5	34	316	B. abortus bv3	Cattle	Senegal	1976
2018Vergnaud#0750	3920	BCCN#76-318	3	5	4	11	2	2	3	3	9	41	8	4	6	3	5	7	34	316	B. abortus bv3	Cattle	Senegal	1976
2018Vergnaud#1234	4404	BCCN#79-168	3	5	4	11	2	2	3	3	9	41	8	4	5	3	4	6	34	316	B. abortus bv3	Cattle	Senegal	1979
2018Vergnaud#1058	4228	BCCN#77-62	3	5	4	11	2	2	3	3	9	41	8	4	5	3	4	7	34	316	B. abortus bv3	Cattle	Senegal	1977
2018Vergnaud#0323	3493	BCCN#77-11	3	5	4	11	2	2	3	3	7	41	8	4	3	3	10	7	34	317	B. abortus bv3	Cattle	Senegal	1977
2018Vergnaud#1231	4401	BCCN#78-29	3	5	4	11	2	2	3	3	7	41	8	4	5	3	5	5	34	317	B. abortus bv3	Cattle	Senegal	1978
2018Vergnaud#1354	4524	BCCN#78-26	3	5	4	11	2	2	3	3	7	41	8	4	5	3	5	5	34	317	B. abortus bv3	Cattle	Senegal	1978
2018Vergnaud#1344	4514	BCCN#77-28	3	5	4	11	2	2	3	3	7	41	8	6	3	9	6	8	34	317	B. abortus bv3	Cattle	Senegal	1977
2018Vergnaud#0786	3956	BCCN#77-43	3	5	4	11	2	2	3	3	7	41	8	4	4	3	4	8	34	317	B. abortus bv3	Cattle	Senegal	1977
2018Vergnaud#1224	4394	BCCN#77-22	3	5	4	11	2	2	3	3	7	41	8	4	4	3	4	8	34	317	B. abortus bv3	Cattle	Senegal	1977
2018Vergnaud#1225	4395	BCCN#77-23	3	5	4	11	2	2	3	3	7	41	8	4	4	3	4	8	34	317	B. abortus bv3	Cattle	Senegal	1977
2018Vergnaud#1226	4396	BCCN#77-24	3	5	4	11	2	2	3	3	7	41	8	4	4	3	4	8	34	317	B. abortus bv3	Cattle	Senegal	1977
2018Vergnaud#0333	3503	BCCN#78-141	3	5	4	11	2	2	3	3	7	41	8	5	4	3	8	8	34	317	B. abortus bv3	Cattle	Senegal	1978
2018Vergnaud#0335	3505	BCCN#78-16	3	5	4	11	2	2	3	3	7	41	8	4	4	3	5	6	34	317	B. abortus bv3	Cattle	Senegal	1978
2018Vergnaud#0789	3959	BCCN#78-22	3	5	4	11	2	2	3	3	7	41	8	7	4	3	5	7	34	317	B. abortus bv3	Cattle	Senegal	1978
2018Vergnaud#1222	4392	BCCN#77-193	3	5	4	11	2	2	3	3	7	41	8	4	5	3	3	5	34	317	B. abortus bv3	Cattle	Senegal	1977
2018Vergnaud#1223	4393	BCCN#77-194	3	5	4	11	2	2	3	3	7	41	8	4	5	3	3	5	34	317	B. abortus bv3	Cattle	Senegal	1977
2018Vergnaud#0203	3373	BCCN#78-68	3	5	4	11	2	2	3	3	7	41	8	4	5	3	3	7	34	317	B. abortus bv3	Cattle	Senegal	1978
2018Vergnaud#0338	3508	BCCN#78-70	3	5	4	11	2	2	3	3	7	41	8	4	5	3	3	7	34	317	B. abortus bv3	Cattle	Senegal	1978
2018Vergnaud#0189	3359	BCCN#77-53	3	5	4	11	2	2	3	3	7	41	8	4	3	3	7	9	34	317	B. abortus bv3	Cattle	Senegal	1977
2018Vergnaud#1349	4519	BCCN#77-57	3	5	4	11	2	2	3	3	7	41	8	4	6	3	5	6	34	317	B. abortus bv3	Cattle	Senegal	1977
2018Vergnaud#0325	3495	BCCN#77-197	3	5	4	11	2	2	3	3	7	41	8	4	5	3	3	5	34	317	B. abortus bv3	Cattle	Senegal	1977
2018Vergnaud#0784	3954	BCCN#77-204	3	5	4	11	2	2	3	3	7	41	8	4	5	3	3	5	34	317	B. abortus bv3	Cattle	Senegal	1977
2018Vergnaud#0753	3923	BCCN#77-201	3	5	4	11	2	2	3	3	7	41	8	5	7	3	4	6	34	317	B. abortus bv3	Cattle	Senegal	1977
2018Vergnaud#0191	3361	BCCN#77-65	3	5	4	11	2	2	3	3	7	41	8	4	4	3	5	7	34	317	B. abortus bv3	Cattle	Senegal	1977
2018Vergnaud#1346	4516	BCCN#77-38	3	5	4	11	2	2	3	3	7	41	8	4	7	3	5	5	34	317	B. abortus bv3	Cattle	Senegal	1977
2018Vergnaud#1347	4517	BCCN#77-39	3	5	4	11	2	2	3	3	7	41	8	4	7	3	5	5	34	317	B. abortus bv3	Cattle	Senegal	1977
2018Vergnaud#0326	3496	BCCN#77-198	3	5	4	11	2	2	3	3	7	41	8	4	5	3	3	5	34	317	B. abortus bv3	Cattle	Senegal	1977
2018Vergnaud#0752	3922	BCCN#77-183	3	5	4	11	2	2	3	3	7	41	8	6	4	3	6	6	34	317	B. abortus bv3	Cattle	Senegal	1977
2018Vergnaud#1055	4225	BCCN#77-185	3	5	4	11	2	2	3	3	7	41	8	5	7	3	4	6	34	317	B. abortus bv3	Cattle	Senegal	1977
2018Vergnaud#0339	3509	BCCN#78-72	3	5	4	11	2	2	3	3	7	41	8	4	5	3	3	7	34	317	B. abortus bv3	Cattle	Senegal	1978
2018Vergnaud#0331	3501	BCCN#77-208	3	5	4	11	2	2	3	3	7	41	8	5	6	3	4	6	34	317	B. abortus bv3	Cattle	Senegal	1977
2018Vergnaud#1229	4399	BCCN#77-34	3	5	4	11	2	2	3	3	7	41	8	5	4	3	5	7	34	317	B. abortus bv3	Cattle	Senegal	1977
2018Vergnaud#0201	3371	BCCN#78-47	3	5	4	11	2	2	3	3	7	41	8	5	4	3	7	6	34	317	B. abortus bv3	Cattle	Senegal	1978
2018Vergnaud#0759	3929	BCCN#78-49	3	5	4	11	2	2	3	3	7	41	8	5	4	3	5	7	34	317	B. abortus bv3	Cattle	Senegal	1978
2018Vergnaud#1061	4231	BCCN#78-46	3	5	4	11	2	2	3	3	7	41	8	5	4	3	7	6	34	317	B. abortus bv3	Cattle	Senegal	1978
2018Vergnaud#1358	4528	BCCN#78-34	3	5	4	11	2	2	3	3	7	41	8	5	4	3	7	6	34	317	B. abortus bv3	Cattle	Senegal	1978
2018Vergnaud#1360	4530	BCCN#78-44	3	5	4	11	2	2	3	3	7	41	8	5	4	3	7	6	34	317	B. abortus bv3	Cattle	Senegal	1978
2018Vergnaud#0193	3363	BCCN#78-129	3	5	4	11	2	2	3	3	7	41	8	5	6	3	3	5	34	317	B. abortus bv3	Cattle	Senegal	1978
2018Vergnaud#0332	3502	BCCN#78-128	3	5	4	11	2	2	3	3	7	41	8	5	6	3	3	5	34	317	B. abortus bv3	Cattle	Senegal	1978
2018Vergnaud#0757	3927	BCCN#78-130	3	5	4	11	2	2	3	3	7	41	8	5	6	3	3	5	34	317	B. abortus bv3	Cattle	Senegal	1978
2018Vergnaud#0758	3928	BCCN#78-131	3	5	4	11	2	2	3	3	7	41	8	5	6	3	3	5	34	317	B. abortus bv3	Cattle	Senegal	1978
2018Vergnaud#0196	3366	BCCN#78-138	3	5	4	11	2	2	3	3	7	41	8	4	5	3	3	4	34	317	B. abortus bv3	Cattle	Senegal	1978
2018Vergnaud#1060	4230	BCCN#78-137	3	5	4	11	2	2	3	3	7	41	8	4	5	3	3	4	34	317	B. abortus bv3	Cattle	Senegal	1978
2018Vergnaud#0194	3364	BCCN#78-132	3	5	4	11	2	2	3	3	7	41	8	4	5	3	3	4	34	317	B. abortus bv3	Cattle	Senegal	1978
2018Vergnaud#1059	4229	BCCN#78-136	3	5	4	11	2	2	3	3	7	41	8	5	4	3	5	6	34	317	B. abortus bv3	Cattle	Senegal	1978
2018Vergnaud#0755	3925	BCCN#77-41	3	5	4	11	2	2	3	3	7	41	8	9	4	3	5	5	34	317	B. abortus bv3	Cattle	Senegal	1977
2018Vergnaud#0329	3499	BCCN#79-152	3	5	4	11	2	2	3	3	7	41	8	6	4	3	6	6	34	317	B. abortus bv3	Cattle	Senegal	1979
2018Vergnaud#0330	3500	BCCN#79-180	3	5	4	11	2	2	3	3	7	41	8	4	5	3	5	5	34	317	B. abortus bv3	Cattle	Senegal	1979
2018Vergnaud#0340	3510	BCCN#79-179	3	5	4	11	2	2	3	3	7	41	8	5	3	3	6	6	34	317	B. abortus bv3	Cattle	Senegal	1979
2018Vergnaud#0341	3511	BCCN#79-99	3	5	4	11	2	2	3	3	7	41	8	4	5	3	3	5	34	317	B. abortus bv3	Cattle	Senegal	1979
2018Vergnaud#0388	3558	BCCN#79-153	3	5	4	11	2	2	3	3	7	41	8	6	4	3	6	6	34	317	B. abortus bv3	Cattle	Senegal	1979
2018Vergnaud#0761	3931	BCCN#79-176	3	5	4	11	2	2	3	3	7	41	8	4	4	3	5	8	34	317	B. abortus bv3	Cattle	Senegal	1979
2018Vergnaud#0762	3932	BCCN#79-178	3	5	4	11	2	2	3	3	7	41	8	5	5	3	5	5	34	317	B. abortus bv3	Cattle	Senegal	1979
2018Vergnaud#0795	3965	BCCN#79-158	3	5	4	11	2	2	3	3	7	41	8	5	3	3	6	7	34	317	B. abortus bv3	Cattle	Senegal	1979
2018Vergnaud#0797	3967	BCCN#79-165	3	5	4	11	2	2	3	3	7	41	8	5	3	3	6	6	34	317	B. abortus bv3	Cattle	Senegal	1979
2018Vergnaud#0798	3968	BCCN#79-171	3	5	4	11	2	2	3	3	7	41	8	4	7	3	3	5	34	317	B. abortus bv3	Cattle	Senegal	1979
2018Vergnaud#1062	4232	BCCN#79-161	3	5	4	11	2	2	3	3	7	41	8	4	5	3	5	5	34	317	B. abortus bv3	Cattle	Senegal	1979
2018Vergnaud#1237	4407	BCCN#79-174	3	5	4	11	2	2	3	3	7	41	8	4	5	3	3	5	34	317	B. abortus bv3	Cattle	Senegal	1979
2018Vergnaud#1363	4533	BCCN#79-156	3	5	4	11	2	2	3	3	7	41	8	5	6	3	3	7	34	317	B. abortus bv3	Cattle	Senegal	1979
2018Vergnaud#1364	4534	BCCN#79-159	3	5	4	11	2	2	3	3	7	41	8	4	5	3	3	5	34	317	B. abortus bv3	Cattle	Senegal	1979
2018Vergnaud#0324	3494	BCCN#77-118	3	5	4	11	2	2	3	3	7	41	8	5	6	3	3	5	34	317	B. abortus bv3	Cattle	Senegal	1977
2018Vergnaud#0204	3374	BCCN#78-71	3	5	4	11	2	2	3	3	7	41	8	4	5	3	3	7	34	317	B. abortus bv3	Cattle	Senegal	1978
2018Vergnaud#0328	3498	BCCN#78-17	3	5	4	11	2	2	3	3	7	41	8	5	5	3	4	5	34	317	B. abortus bv3	Cattle	Senegal	1978
2018Vergnaud#0787	3957	BCCN#77-44	3	5	4	11	2	2	3	3	7	41	8	4	7	3	3	5	34	317	B. abortus bv3	Cattle	Senegal	1977
2018Vergnaud#1343	4513	BCCN#77-26	3	5	4	11	2	2	3	3	7	41	8	4	7	3	3	5	34	317	B. abortus bv3	Cattle	Senegal	1977
2018Vergnaud#1053	4223	BCCN#76-425	3	5	4	11	2	2	3	3	7	41	8	5	5	3	3	7	34	317	B. abortus bv3	Cattle	Senegal	1976
2018Vergnaud#0185	3355	BCCN#77-116	3	5	4	11	2	2	3	3	7	41	8	5	4	8	5	6	34	317	B. abortus bv3	Cattle	Senegal	1977
2018Vergnaud#0188	3358	BCCN#77-50	3	5	4	11	2	2	3	3	7	41	8	4	4	3	5	5	34	317	B. abortus bv3	Cattle	Senegal	1977
2018Vergnaud#0195	3365	BCCN#78-134	3	5	4	11	2	2	3	3	7	41	8	5	6	3	3	5	34	317	B. abortus bv3	Cattle	Senegal	1978
2010Her#04	854	#6	4	5	4	12	2	3	3	3	6	43	8	4	4	3	3	6	27	79	B. abortus	Human	South Korea	2004
2009Her#073	479	KBa062	4	5	4	12	2	3	3	3	6	43	8	4	4	3	3	5	27	79	B. abortus bv1	Cattle	South Korea	2007
2009Her#074	480	KBa063	4	5	4	12	2	3	3	3	6	43	8	4	4	3	3	5	27	79	B. abortus bv1	Cattle	South Korea	2007
2009Her#075	481	KBa064	4	5	4	12	2	3	3	3	6	43	8	4	4	3	3	5	27	79	B. abortus bv1	Cattle	South Korea	2007
2009Her#080	486	KBa069	4	5	4	12	2	3	3	3	6	43	8	5	4	3	3	6	27	79	B. abortus bv1	Cattle	South Korea	2007
2009Her#089	495	KBa078	4	5	4	12	2	3	3	3	6	43	8	4	4	3	3	6	27	79	B. abortus bv1	Cattle	South Korea	2007
2009Her#112	518	KBa101	4	5	4	12	2	3	3	3	6	43	8	3	7	3	3	5	27	79	B. abortus bv1	Cattle	South Korea	1999
2009Her#113	519	KBa102	4	5	4	12	2	3	3	3	6	43	8	4	4	3	3	6	27	79	B. abortus bv1	Cattle	South Korea	2000
2009Her#164	570	KBa153	4	5	4	12	2	3	3	3	6	43	8	4	4	3	3	6	27	79	B. abortus bv1	Cattle	South Korea	2005
2010Her#16	866	#36	4	5	4	12	2	3	3	3	6	43	8	4	4	3	3	6	27	79	B. abortus	Human	South Korea	2005
2010Her#22	872	#50	4	5	4	12	2	3	3	3	6	43	8	4	4	3	3	6	27	79	B. abortus	Human	South Korea	2006
2009Her#022	428	KBa011	4	5	4	12	2	3	3	3	6	43	8	4	4	3	3	6	27	79	B. abortus bv1	Cattle	South Korea	1996
2009Her#023	429	KBa012	4	5	4	12	2	3	3	3	6	43	8	4	4	3	3	6	27	79	B. abortus bv1	Cattle	South Korea	1996
2009Her#024	430	KBa013	4	5	4	12	2	3	3	3	6	43	8	4	4	3	3	6	27	79	B. abortus bv1	Cattle	South Korea	1996
2009Her#025	431	KBa014	4	5	4	12	2	3	3	3	6	43	8	4	4	3	3	6	27	79	B. abortus bv1	Cattle	South Korea	1996
2009Her#026	432	KBa015	4	5	4	12	2	3	3	3	6	43	8	4	4	3	3	6	27	79	B. abortus bv1	Cattle	South Korea	1996
2009Her#027	433	KBa016	4	5	4	12	2	3	3	3	6	43	8	4	4	3	3	6	27	79	B. abortus bv1	Cattle	South Korea	1996
2009Her#109	515	KBa098	4	5	4	12	2	3	3	3	6	43	8	4	4	3	3	6	27	79	B. abortus bv1	Cattle	South Korea	1996
2009Her#111	517	KBa100	4	5	4	12	2	3	3	3	6	43	8	4	4	3	3	6	27	79	B. abortus bv1	Cattle	South Korea	1999
2009Her#117	523	KBa106	4	5	4	12	2	3	3	3	6	43	8	4	4	3	3	6	27	79	B. abortus bv1	Cattle	South Korea	2003
2009Her#159	565	KBa148	4	5	4	12	2	3	3	3	6	43	8	4	4	3	3	6	27	79	B. abortus bv1	Cattle	South Korea	2005
2009Her#160	566	KBa149	4	5	4	12	2	3	3	3	6	43	8	5	4	3	3	6	27	79	B. abortus bv1	Cattle	South Korea	2005
2009Her#161	567	KBa150	4	5	4	12	2	3	3	3	6	43	8	5	4	3	3	6	27	79	B. abortus bv1	Cattle	South Korea	2005
2009Her#162	568	KBa151	4	5	4	12	2	3	3	3	6	43	8	5	4	3	3	6	27	79	B. abortus bv1	Cattle	South Korea	2005
2009Her#163	569	KBa152	4	5	4	12	2	3	3	3	6	43	8	4	4	3	3	6	27	79	B. abortus bv1	Cattle	South Korea	2005
2010Her#01	851	#2	4	5	4	12	2	3	3	3	6	43	8	4	4	3	3	6	27	79	B. abortus	Human	South Korea	2003
2010Her#02	852	#3	4	5	4	12	2	3	3	3	6	43	8	4	4	3	3	6	27	79	B. abortus	Human	South Korea	2003
2010Her#27	877	#63	4	5	4	12	2	3	3	3	6	43	8	4	4	3	3	6	27	79	B. abortus	Human	South Korea	2006
2010Her#34	884	#87	4	5	4	12	2	3	3	3	6	43	8	4	4	3	3	6	27	79	B. abortus	Human	South Korea	2007
2010Her#18	868	#40	4	5	4	12	2	3	3	3	6	43	8	4	4	3	3	7	27	79	B. abortus	Human	South Korea	2005
2010Her#26	876	#61	4	5	4	12	2	3	3	3	6	43	8	4	4	3	3	6	27	79	B. abortus	Human	South Korea	2006
2010Her#33	883	#85	4	5	4	12	2	3	3	3	6	43	8	5	4	3	3	6	27	79	B. abortus	Human	South Korea	2007
2009Her#045	451	KBa034	4	5	4	12	2	3	3	3	6	43	8	4	4	3	3	6	27	79	B. abortus bv1	Cattle	South Korea	1998
2009Her#046	452	KBa035	4	5	4	12	2	3	3	3	6	43	8	4	4	3	3	6	27	79	B. abortus bv1	Cattle	South Korea	2006
2009Her#058	464	KBa047	4	5	4	12	2	3	3	3	6	43	8	5	4	3	3	5	27	79	B. abortus bv1	Cattle	South Korea	2006
2009Her#115	521	KBa104	4	5	4	12	2	3	3	3	6	43	8	4	4	3	3	5	27	79	B. abortus bv1	Cattle	South Korea	2002
2009Her#116	522	KBa105	4	5	4	12	2	3	3	3	6	43	8	4	4	3	3	5	27	79	B. abortus bv1	Cattle	South Korea	2003
2009Her#151	557	KBa140	4	5	4	12	2	3	3	3	6	43	8	4	4	3	3	6	27	79	B. abortus bv1	Cattle	South Korea	2005
2009Her#170	576	KBa159	4	5	4	12	2	3	3	3	6	43	8	4	4	3	3	6	27	79	B. abortus bv1	Cattle	South Korea	2002
2009Her#171	577	KBa160	4	5	4	12	2	3	3	3	6	43	8	5	4	3	3	6	27	79	B. abortus bv1	Cattle	South Korea	2002
2009Her#172	578	KBa161	4	5	4	12	2	3	3	3	6	43	8	4	4	3	3	6	27	79	B. abortus bv1	Cattle	South Korea	2003
2009Her#173	579	KBa162	4	5	4	12	2	3	3	3	6	43	8	4	4	3	3	6	27	79	B. abortus bv1	Cattle	South Korea	2003
2010Her#14	864	#28	4	5	4	12	2	3	3	3	6	43	8	5	4	3	3	6	27	79	B. abortus	Human	South Korea	2005
2010Her#23	873	#53	4	5	4	12	2	3	3	3	6	43	8	4	4	3	3	6	27	79	B. abortus	Human	South Korea	2006
2009Her#031	437	KBa020	4	5	4	12	2	3	3	3	6	43	8	4	4	3	3	6	27	79	B. abortus bv1	Cattle	South Korea	2000
2009Her#063	469	KBa052	4	5	4	12	2	3	3	3	6	43	8	4	4	3	3	5	27	79	B. abortus bv1	Cattle	South Korea	2007
2009Her#064	470	KBa053	4	5	4	12	2	3	3	3	6	43	8	4	4	3	3	5	27	79	B. abortus bv1	Cattle	South Korea	2007
2009Her#065	471	KBa054	4	5	4	12	2	3	3	3	6	43	8	4	4	3	3	5	27	79	B. abortus bv1	Cattle	South Korea	2007
2009Her#066	472	KBa055	4	5	4	12	2	3	3	3	6	43	8	4	4	3	3	5	27	79	B. abortus bv1	Cattle	South Korea	2007
2009Her#067	473	KBa056	4	5	4	12	2	3	3	3	6	43	8	4	4	3	3	5	27	79	B. abortus bv1	Cattle	South Korea	2007
2009Her#068	474	KBa057	4	5	4	12	2	3	3	3	6	43	8	4	4	3	3	5	27	79	B. abortus bv1	Cattle	South Korea	2007
2009Her#083	489	KBa072	4	5	4	12	2	3	3	3	6	43	8	4	4	3	3	6	27	79	B. abortus bv1	Cattle	South Korea	2007
2009Her#084	490	KBa073	4	5	4	12	2	3	3	3	6	43	8	4	4	3	3	6	27	79	B. abortus bv1	Cattle	South Korea	2007
2009Her#091	497	KBa080	4	5	4	12	2	3	3	3	6	43	8	5	4	3	3	6	27	79	B. abortus bv1	Cattle	South Korea	2008
2009Her#092	498	KBa081	4	5	4	12	2	3	3	3	6	43	8	5	4	3	3	6	27	79	B. abortus bv1	Cattle	South Korea	2008
2009Her#093	499	KBa082	4	5	4	12	2	3	3	3	6	43	8	5	4	3	3	6	27	79	B. abortus bv1	Cattle	South Korea	2008
2009Her#098	504	KBa087	4	5	4	12	2	3	3	3	6	43	8	5	4	3	3	5	27	79	B. abortus bv1	Cattle	South Korea	2008
2009Her#099	505	KBa088	4	5	4	12	2	3	3	3	6	43	8	5	4	3	3	5	27	79	B. abortus bv1	Cattle	South Korea	2008
2009Her#100	506	KBa089	4	5	4	12	2	3	3	3	6	43	8	5	4	3	3	5	27	79	B. abortus bv1	Cattle	South Korea	2008
2009Her#101	507	KBa090	4	5	4	12	2	3	3	3	6	43	8	5	4	3	3	5	27	79	B. abortus bv1	Cattle	South Korea	2008
2009Her#105	511	KBa094	4	5	4	12	2	3	3	3	6	43	8	4	4	3	3	5	27	79	B. abortus bv1	Cattle	South Korea	2008
2009Her#110	516	KBa099	4	5	4	12	2	3	3	3	6	43	8	4	4	3	3	5	27	79	B. abortus bv1	Cattle	South Korea	1999
2009Her#114	520	KBa103	4	5	4	12	2	3	3	3	6	43	8	4	4	3	3	6	27	79	B. abortus bv1	Cattle	South Korea	2001
2009Her#119	525	KBa108	4	5	4	12	2	3	3	3	6	43	8	4	4	3	3	6	27	79	B. abortus bv1	Cattle	South Korea	2004
2009Her#120	526	KBa109	4	5	4	12	2	3	3	3	6	43	8	5	4	3	3	5	27	79	B. abortus bv1	Cattle	South Korea	2004
2009Her#121	527	KBa110	4	5	4	12	2	3	3	3	6	43	8	4	4	3	3	4	27	79	B. abortus bv1	Cattle	South Korea	2004
2009Her#122	528	KBa111	4	5	4	12	2	3	3	3	6	43	8	5	4	3	3	5	27	79	B. abortus bv1	Cattle	South Korea	2004
2009Her#123	529	KBa112	4	5	4	12	2	3	3	3	6	43	8	4	4	3	3	6	27	79	B. abortus bv1	Cattle	South Korea	2004
2009Her#124	530	KBa113	4	5	4	12	2	3	3	3	6	43	8	5	4	3	3	5	27	79	B. abortus bv1	Cattle	South Korea	2004
2009Her#125	531	KBa114	4	5	4	12	2	3	3	3	6	43	8	4	4	3	3	5	27	79	B. abortus bv1	Cattle	South Korea	2004
2009Her#127	533	KBa116	4	5	4	12	2	3	3	3	6	43	8	4	4	3	3	6	27	79	B. abortus bv1	Cattle	South Korea	2004
2009Her#142	548	KBa131	4	5	4	12	2	3	3	3	6	43	8	4	4	3	3	7	27	79	B. abortus bv1	Cattle	South Korea	2005
2009Her#143	549	KBa132	4	5	4	12	2	3	3	3	6	43	8	4	4	3	3	6	27	79	B. abortus bv1	Cattle	South Korea	2005
2009Her#168	574	KBa157	4	5	4	12	2	3	3	3	6	43	8	5	4	3	3	5	27	79	B. abortus bv1	Cattle	South Korea	2006
2009Her#178	584	KBa167	4	5	4	12	2	3	3	3	6	43	8	4	4	3	3	6	27	79	B. abortus bv1	Cattle	South Korea	2008
2009Her#179	585	KBa168	4	5	4	12	2	3	3	3	6	43	8	4	4	3	3	6	27	79	B. abortus bv1	Cattle	South Korea	2008
2009Her#180	586	KBa169	4	5	4	12	2	3	3	3	6	43	8	4	4	3	3	6	27	79	B. abortus bv1	Cattle	South Korea	2008
2009Her#182	588	KBa171	4	5	4	12	2	3	3	3	6	43	8	5	4	3	3	5	27	79	B. abortus bv1	Cattle	South Korea	2008
2009Her#183	589	KBa172	4	5	4	12	2	3	3	3	6	43	8	5	4	3	3	5	27	79	B. abortus bv1	Cattle	South Korea	2008
GCA_000238175	10017	A13334	4	5	4	12	2	3	3	3	6	43	8	4	4	3	3	6	27	79	B. abortus	Cattle	South Korea	2011
2010Her#05	855	#8	4	5	4	12	2	3	3	3	6	43	8	4	4	3	3	6	27	79	B. abortus	Human	South Korea	2004
2010Her#12	862	#22	4	5	4	12	2	3	3	3	6	43	8	4	4	3	3	6	27	79	B. abortus	Human	South Korea	2005
2010Her#21	871	#49	4	5	4	12	2	3	3	3	6	43	8	4	4	3	3	6	27	79	B. abortus	Human	South Korea	2006
2010Her#32	882	#84	4	5	4	12	2	3	3	3	6	43	8	5	4	3	3	6	27	79	B. abortus	Human	South Korea	2007
2009Her#147	553	KBa136	4	5	4	12	2	3	3	3	6	43	8	4	4	3	3	6	27	79	B. abortus bv1	Cattle	South Korea	2005
2009Her#019	425	KBa008	4	5	4	12	2	3	3	3	6	43	8	4	4	3	3	6	27	79	B. abortus bv1	Cattle	South Korea	2004
2009Her#020	426	KBa009	4	5	4	12	2	3	3	3	6	43	8	4	4	3	3	6	27	79	B. abortus bv1	Cattle	South Korea	2004
2009Her#021	427	KBa010	4	5	4	12	2	3	3	3	6	43	8	4	4	3	3	6	27	79	B. abortus bv1	Cattle	South Korea	2004
2009Her#028	434	KBa017	4	5	4	12	2	3	3	3	6	43	8	4	4	3	3	4	27	79	B. abortus bv1	Cattle	South Korea	1996
2010Her#09	859	#17	4	5	4	12	2	3	3	3	6	43	8	4	4	3	3	6	27	79	B. abortus	Human	South Korea	2004
2010Her#10	860	#20	4	5	4	12	2	3	3	3	6	43	8	4	4	3	3	6	27	79	B. abortus	Human	South Korea	2005
2010Her#38	888	#91	4	5	4	12	2	3	3	3	6	43	8	4	4	3	3	5	27	79	B. abortus	Human	South Korea	2007
2009Her#029	435	KBa018	4	5	4	12	2	3	3	3	6	43	8	4	4	3	3	6	27	79	B. abortus bv1	Cattle	South Korea	2002
2009Her#128	534	KBa117	4	5	4	12	2	3	3	3	6	43	8	4	4	3	3	6	27	79	B. abortus bv1	Cattle	South Korea	2004
2009Her#129	535	KBa118	4	5	4	12	2	3	3	3	6	43	8	4	4	3	3	6	27	79	B. abortus bv1	Cattle	South Korea	2004
2009Her#130	536	KBa119	4	5	4	12	2	3	3	3	6	43	8	4	4	3	3	5	27	79	B. abortus bv1	Cattle	South Korea	2004
2009Her#131	537	KBa120	4	5	4	12	2	3	3	3	6	43	8	4	4	3	3	6	27	79	B. abortus bv1	Cattle	South Korea	2004
2009Her#153	559	KBa142	4	5	4	12	2	3	3	3	6	43	8	4	4	3	3	6	27	79	B. abortus bv1	Cattle	South Korea	2005
2009Her#154	560	KBa143	4	5	4	12	2	3	3	3	6	43	8	4	4	3	3	6	27	79	B. abortus bv1	Cattle	South Korea	2005
2009Her#155	561	KBa144	4	5	4	12	2	3	3	3	6	43	8	4	4	3	3	6	27	79	B. abortus bv1	Cattle	South Korea	2005
2009Her#106	512	KBa095	4	5	4	12	2	3	3	3	6	43	8	4	4	3	3	6	27	79	B. abortus bv1	Deer/Elk/Reindeer	South Korea	2008
2009Her#107	513	KBa096	4	5	4	12	2	3	3	3	6	43	8	4	4	3	3	6	27	79	B. abortus bv1	Deer/Elk/Reindeer	South Korea	2008
2009Her#108	514	KBa097	4	5	4	12	2	3	3	3	6	43	8	4	4	3	3	6	27	79	B. abortus bv1	Deer/Elk/Reindeer	South Korea	2008
2009Her#184	590	KBa173	4	5	4	12	2	3	3	3	6	43	8	4	4	3	3	7	27	79	B. abortus bv1	Cattle	South Korea	2008
2009Her#181	587	KBa170	4	5	4	12	2	3	3	3	6	43	8	4	4	3	3	6	27	79	B. abortus bv2	Cattle	South Korea	2008
2009Her#185	591	KBa174	4	5	4	12	2	3	3	3	6	43	8	4	4	3	3	6	27	79	B. abortus bv2	Cattle	South Korea	2008
2009Her#186	592	KBa175	4	5	4	12	2	3	3	3	6	43	8	4	4	3	3	6	27	79	B. abortus bv2	Cattle	South Korea	2008
2009Her#187	593	KBa176	4	5	4	12	2	3	3	3	6	43	8	4	4	3	3	6	27	79	B. abortus bv2	Cattle	South Korea	2008
2009Her#188	594	KBa177	4	5	4	12	2	3	3	3	6	43	8	4	4	3	3	6	27	79	B. abortus bv2	Cattle	South Korea	2008
2009Her#070	476	KBa059	4	5	4	12	2	3	3	3	6	43	8	4	4	3	3	6	27	79	B. abortus bv1	Cattle	South Korea	2007
2009Her#071	477	KBa060	4	5	4	12	2	3	3	3	6	43	8	4	4	3	3	6	27	79	B. abortus bv1	Cattle	South Korea	2007
2009Her#072	478	KBa061	4	5	4	12	2	3	3	3	6	43	8	4	4	3	3	6	27	79	B. abortus bv1	Cattle	South Korea	2007
2009Her#076	482	KBa065	4	5	4	12	2	3	3	3	6	43	8	4	4	3	3	6	27	79	B. abortus bv1	Cattle	South Korea	2007
2009Her#081	487	KBa070	4	5	4	12	2	3	3	3	6	43	8	4	4	3	3	6	27	79	B. abortus bv1	Cattle	South Korea	2007
2009Her#082	488	KBa071	4	5	4	12	2	3	3	3	6	43	8	4	4	3	3	6	27	79	B. abortus bv1	Cattle	South Korea	2007
2009Her#085	491	KBa074	4	5	4	12	2	3	3	3	6	43	8	4	4	3	3	6	27	79	B. abortus bv1	Cattle	South Korea	2007
2009Her#086	492	KBa075	4	5	4	12	2	3	3	3	6	43	8	4	4	3	3	6	27	79	B. abortus bv1	Cattle	South Korea	2007
2009Her#087	493	KBa076	4	5	4	12	2	3	3	3	6	43	8	4	4	3	3	6	27	79	B. abortus bv1	Cattle	South Korea	2007
2009Her#088	494	KBa077	4	5	4	12	2	3	3	3	6	43	8	4	4	3	3	6	27	79	B. abortus bv1	Cattle	South Korea	2007
2009Her#132	538	KBa121	4	5	4	12	2	3	3	3	6	43	8	4	4	3	3	6	27	79	B. abortus bv1	Cattle	South Korea	2005
2009Her#134	540	KBa123	4	5	4	12	2	3	3	3	6	43	8	4	4	3	3	5	27	79	B. abortus bv1	Cattle	South Korea	2005
2009Her#135	541	KBa124	4	5	4	12	2	3	3	3	6	43	8	4	4	3	3	5	27	79	B. abortus bv1	Cattle	South Korea	2005
2009Her#136	542	KBa125	4	5	4	12	2	3	3	3	6	43	8	4	4	3	3	6	27	79	B. abortus bv1	Cattle	South Korea	2005
2009Her#137	543	KBa126	4	5	4	12	2	3	3	3	6	43	8	4	4	3	3	4	27	79	B. abortus bv1	Cattle	South Korea	2005
2009Her#138	544	KBa127	4	5	4	12	2	3	3	3	6	43	8	4	4	3	3	4	27	79	B. abortus bv1	Cattle	South Korea	2005
2009Her#139	545	KBa128	4	5	4	12	2	3	3	3	6	43	8	4	4	3	3	5	27	79	B. abortus bv1	Cattle	South Korea	2005
2009Her#140	546	KBa129	4	5	4	12	2	3	3	3	6	43	8	4	4	3	3	6	27	79	B. abortus bv1	Cattle	South Korea	2005
2009Her#141	547	KBa130	4	5	4	12	2	3	3	3	6	43	8	4	4	3	3	5	27	79	B. abortus bv1	Cattle	South Korea	2005
2009Her#166	572	KBa155	4	5	4	12	2	3	3	3	6	43	8	4	4	3	3	6	27	79	B. abortus bv1	Cattle	South Korea	2006
2009Her#169	575	KBa158	4	5	4	12	2	3	3	3	6	43	8	5	4	3	3	6	27	79	B. abortus bv1	Cattle	South Korea	2006
2010Her#11	861	#21	4	5	4	12	2	3	3	3	6	43	8	4	4	3	3	6	27	79	B. abortus	Human	South Korea	2005
2009Her#144	550	KBa133	4	5	4	12	2	2	3	3	6	43	8	4	4	3	3	6	28	82	B. abortus bv1	Cattle	South Korea	2005
2009Her#017	423	KBa006	4	5	4	12	2	2	3	3	6	43	8	4	4	3	3	6	28	82	B. abortus bv1	Cattle	South Korea	2004
2009Her#018	424	KBa007	4	5	4	12	2	2	3	3	6	43	8	4	4	3	3	6	28	82	B. abortus bv1	Cattle	South Korea	2004
2010Her#03	853	#4	4	5	4	12	2	2	3	3	6	43	8	4	4	3	3	6	28	82	B. abortus	Human	South Korea	2003
2009Her#133	539	KBa122	4	5	4	12	2	2	3	3	6	43	8	4	4	3	3	5	28	82	B. abortus bv1	Cattle	South Korea	2005
2010Her#37	887	#90	4	5	4	12	2	5	3	3	6	43	8	4	4	3	3	6	89	174	B. abortus	Human	South Korea	2007
2009Her#090	496	KBa079	4	5	4	12	2	5	3	3	6	43	8	4	4	3	3	5	89	174	B. abortus bv1	Cattle	South Korea	2007
2009Her#094	500	KBa083	4	5	4	12	2	5	3	3	6	43	8	4	4	3	3	6	89	174	B. abortus bv1	Cattle	South Korea	2008
2009Her#095	501	KBa084	4	5	4	12	2	5	3	3	6	43	8	4	4	3	3	6	89	174	B. abortus bv1	Cattle	South Korea	2008
2009Her#096	502	KBa085	4	5	4	12	2	5	3	3	6	43	8	4	4	3	3	6	89	174	B. abortus bv1	Cattle	South Korea	2008
2009Her#097	503	KBa086	4	5	4	12	2	5	3	3	6	43	8	4	4	3	3	6	89	174	B. abortus bv1	Cattle	South Korea	2008
2009Her#033	439	KBa022	4	5	4	12	2	6	3	3	6	43	8	4	4	3	3	6	90	175	B. abortus bv1	Cattle	South Korea	2005
2009Her#035	441	KBa024	4	5	4	12	2	6	3	3	6	43	8	4	4	3	3	5	90	175	B. abortus bv1	Cattle	South Korea	2005
2009Her#036	442	KBa025	4	5	4	12	2	6	3	3	6	43	8	4	4	3	3	6	90	175	B. abortus bv1	Cattle	South Korea	2005
2009Her#077	483	KBa066	4	5	4	12	2	4	3	3	6	43	8	4	4	3	3	6	91	176	B. abortus bv1	Cattle	South Korea	2007
2009Her#078	484	KBa067	4	5	4	12	2	4	3	3	6	43	8	4	4	3	3	6	91	176	B. abortus bv1	Cattle	South Korea	2007
2009Her#079	485	KBa068	4	5	4	12	2	4	3	3	6	43	8	4	4	3	3	6	91	176	B. abortus bv1	Cattle	South Korea	2007
2009Her#165	571	KBa154	4	5	4	12	2	4	3	3	6	43	8	4	4	3	3	6	91	176	B. abortus bv1	Cattle	South Korea	2005
2010Her#13	863	#23	4	5	4	12	2	4	3	3	6	43	8	4	4	3	3	6	91	176	B. abortus	Human	South Korea	2005
2010Her#15	865	#31	4	5	4	12	2	4	3	3	6	43	8	4	4	3	3	6	91	176	B. abortus	Human	South Korea	2005
2010Her#17	867	#37	4	5	4	12	2	4	3	3	6	43	8	4	4	3	3	6	91	176	B. abortus	Human	South Korea	2005
2010Her#06	856	#11	4	5	4	12	2	4	3	3	6	43	8	4	4	3	3	6	91	176	B. abortus	Human	South Korea	2004
2010Her#07	857	#12	4	5	4	12	2	4	3	3	6	43	8	4	4	3	3	6	91	176	B. abortus	Human	South Korea	2004
2010Her#08	858	#13	4	5	4	12	2	4	3	3	6	43	8	4	4	3	3	6	91	176	B. abortus	Human	South Korea	2004
2010Her#19	869	#42	4	5	4	12	2	4	3	3	6	43	8	4	4	3	3	6	91	176	B. abortus	Human	South Korea	2005
2010Her#20	870	#48	4	5	4	12	2	4	3	3	6	43	8	4	4	3	3	6	91	176	B. abortus	Human	South Korea	2006
2010Her#25	875	#60	4	5	4	12	2	4	3	3	6	43	8	4	4	3	3	6	91	176	B. abortus	Human	South Korea	2006
2010Her#28	878	#68	4	5	4	12	2	4	3	3	6	43	8	4	4	3	3	7	91	176	B. abortus	Human	South Korea	2006
2010Her#31	881	#79	4	5	4	12	2	4	3	3	6	43	8	4	4	3	3	6	91	176	B. abortus	Human	South Korea	2006
2010Her#35	885	#88	4	5	4	12	2	4	3	3	6	43	8	4	4	3	3	6	91	176	B. abortus	Human	South Korea	2007
2010Her#36	886	#89	4	5	4	12	2	4	3	3	6	43	8	4	4	3	3	6	91	176	B. abortus	Human	South Korea	2007
2009Her#047	453	KBa036	4	5	4	12	2	4	3	3	6	43	8	4	4	3	3	6	91	176	B. abortus bv1	Cattle	South Korea	2006
2009Her#048	454	KBa037	4	5	4	12	2	4	3	3	6	43	8	4	4	3	3	6	91	176	B. abortus bv1	Cattle	South Korea	2006
2009Her#049	455	KBa038	4	5	4	12	2	4	3	3	6	43	8	4	4	3	3	6	91	176	B. abortus bv1	Cattle	South Korea	2006
2009Her#050	456	KBa039	4	5	4	12	2	4	3	3	6	43	8	4	4	3	3	6	91	176	B. abortus bv1	Cattle	South Korea	2006
2009Her#051	457	KBa040	4	5	4	12	2	4	3	3	6	43	8	4	4	3	3	6	91	176	B. abortus bv1	Cattle	South Korea	2006
2009Her#052	458	KBa041	4	5	4	12	2	4	3	3	6	43	8	4	4	3	3	6	91	176	B. abortus bv1	Cattle	South Korea	2006
2009Her#053	459	KBa042	4	5	4	12	2	4	3	3	6	43	8	4	4	3	3	6	91	176	B. abortus bv1	Cattle	South Korea	2006
2009Her#054	460	KBa043	4	5	4	12	2	4	3	3	6	43	8	4	4	3	3	6	91	176	B. abortus bv1	Cattle	South Korea	2006
2009Her#055	461	KBa044	4	5	4	12	2	4	3	3	6	43	8	4	4	3	3	6	91	176	B. abortus bv1	Cattle	South Korea	2006
2009Her#056	462	KBa045	4	5	4	12	2	4	3	3	6	43	8	4	4	3	3	6	91	176	B. abortus bv1	Cattle	South Korea	2006
2009Her#057	463	KBa046	4	5	4	12	2	4	3	3	6	43	8	4	4	3	3	6	91	176	B. abortus bv1	Cattle	South Korea	2006
2009Her#059	465	KBa048	4	5	4	12	2	4	3	3	6	43	8	4	4	3	3	5	91	176	B. abortus bv1	Cattle	South Korea	2006
2009Her#060	466	KBa049	4	5	4	12	2	4	3	3	6	43	8	4	4	3	3	6	91	176	B. abortus bv1	Cattle	South Korea	2006
2009Her#061	467	KBa050	4	5	4	12	2	4	3	3	6	43	8	4	4	3	3	6	91	176	B. abortus bv1	Cattle	South Korea	2006
2009Her#062	468	KBa051	4	5	4	12	2	4	3	3	6	43	8	5	5	3	3	6	91	176	B. abortus bv1	Cattle	South Korea	2006
2009Her#174	580	KBa163	4	5	4	12	2	4	3	3	6	43	8	4	4	3	3	6	91	176	B. abortus bv1	Cattle	South Korea	2006
2009Her#175	581	KBa164	4	5	4	12	2	4	3	3	6	43	8	4	4	3	3	6	91	176	B. abortus bv1	Cattle	South Korea	2006
2009Her#176	582	KBa165	4	5	4	12	2	4	3	3	6	43	8	4	4	3	3	6	91	176	B. abortus bv1	Cattle	South Korea	2006
2009Her#177	583	KBa166	4	5	4	12	2	4	3	3	6	43	8	4	4	3	3	6	91	176	B. abortus bv1	Cattle	South Korea	2006
2010Her#29	879	#72	4	5	4	12	2	4	3	3	6	43	8	5	4	3	3	6	91	176	B. abortus	Human	South Korea	2006
2010Her#30	880	#74	4	5	4	12	2	4	3	3	6	43	8	4	4	3	3	6	91	176	B. abortus	Human	South Korea	2006
2009Her#040	446	KBa029	4	5	4	12	2	4	3	3	6	43	8	4	4	3	3	7	91	176	B. abortus bv1	Cattle	South Korea	2006
2009Her#041	447	KBa030	4	5	4	12	2	4	3	3	6	43	8	4	4	3	3	7	91	176	B. abortus bv1	Cattle	South Korea	2006
2009Her#042	448	KBa031	4	5	4	12	2	4	3	3	6	43	8	4	4	3	3	8	91	176	B. abortus bv1	Cattle	South Korea	2006
2009Her#043	449	KBa032	4	5	4	12	2	4	3	3	6	43	8	4	4	3	3	7	91	176	B. abortus bv1	Cattle	South Korea	2006
2009Her#044	450	KBa033	4	5	4	12	2	4	3	3	6	43	8	4	4	3	3	8	91	176	B. abortus bv1	Cattle	South Korea	2006
2009Her#102	508	KBa091	4	5	4	12	2	4	3	3	6	43	8	4	4	3	3	7	91	176	B. abortus bv1	Cattle	South Korea	2008
2009Her#103	509	KBa092	4	5	4	12	2	4	3	3	6	43	8	4	4	3	3	7	91	176	B. abortus bv1	Cattle	South Korea	2008
2009Her#104	510	KBa093	4	5	4	12	2	4	3	3	6	43	8	4	4	3	3	7	91	176	B. abortus bv1	Cattle	South Korea	2008
2009Her#126	532	KBa115	4	5	4	12	2	4	3	3	6	43	8	4	4	3	3	6	91	176	B. abortus bv1	Cattle	South Korea	2004
2009Her#167	573	KBa156	4	5	4	12	2	4	3	3	6	43	8	4	4	3	3	7	91	176	B. abortus bv1	Cattle	South Korea	2006
2010Her#24	874	#56	4	5	4	12	2	4	3	3	6	43	8	5	4	3	3	6	91	176	B. abortus	Human	South Korea	2006
2009Her#145	551	KBa134	4	5	4	12	2	4	3	3	6	43	8	4	4	3	3	6	91	176	B. abortus bv1	Cattle	South Korea	2005
2009Her#146	552	KBa135	4	5	4	12	2	4	3	3	6	43	8	4	4	3	3	6	91	176	B. abortus bv1	Cattle	South Korea	2005
2009Her#148	554	KBa137	4	5	4	12	2	4	3	3	6	43	8	4	4	3	3	6	91	176	B. abortus bv1	Cattle	South Korea	2005
2009Her#149	555	KBa138	4	5	4	12	2	4	3	3	6	43	8	4	4	3	3	6	91	176	B. abortus bv1	Cattle	South Korea	2005
2009Her#150	556	KBa139	4	5	4	12	2	4	3	3	6	43	8	4	4	3	3	6	91	176	B. abortus bv1	Cattle	South Korea	2005
2009Her#012	418	KBa001	4	5	4	12	2	4	3	3	6	43	8	4	4	3	3	6	91	176	B. abortus bv1	Cattle	South Korea	2004
2009Her#013	419	KBa002	4	5	4	12	2	4	3	3	6	43	8	4	4	3	3	6	91	176	B. abortus bv1	Cattle	South Korea	2004
2009Her#014	420	KBa003	4	5	4	12	2	4	3	3	6	43	8	4	4	3	3	6	91	176	B. abortus bv1	Cattle	South Korea	2004
2009Her#015	421	KBa004	4	5	4	12	2	4	3	3	6	43	8	4	4	3	3	6	91	176	B. abortus bv1	Cattle	South Korea	2004
2009Her#016	422	KBa005	4	5	4	12	2	4	3	3	6	43	8	4	4	3	3	6	91	176	B. abortus bv1	Cattle	South Korea	2004
2009Her#156	562	KBa145	4	5	4	12	2	4	3	3	6	43	8	4	4	3	3	6	91	176	B. abortus bv1	Cattle	South Korea	2005
2009Her#157	563	KBa146	4	5	4	12	2	4	3	3	6	43	8	4	4	3	3	6	91	176	B. abortus bv1	Cattle	South Korea	2005
2009Her#158	564	KBa147	4	5	4	12	2	4	3	3	6	43	8	4	4	3	3	6	91	176	B. abortus bv1	Cattle	South Korea	2005
2009Her#030	436	KBa019	4	5	4	12	2	4	3	3	6	43	8	4	4	3	3	6	91	176	B. abortus bv1	Cattle	South Korea	2003
2009Her#037	443	KBa026	4	5	4	12	2	4	3	3	6	43	8	4	4	3	3	6	91	176	B. abortus bv1	Cattle	South Korea	2005
2009Her#038	444	KBa027	4	5	4	12	2	4	3	3	6	43	8	4	4	3	3	6	91	176	B. abortus bv1	Cattle	South Korea	2005
2009Her#039	445	KBa028	4	5	4	12	2	4	3	3	6	43	8	4	4	3	3	6	91	176	B. abortus bv1	Cattle	South Korea	2005
2009Her#152	558	KBa141	4	5	4	12	2	4	3	3	6	43	8	4	4	3	3	6	91	176	B. abortus bv1	Cattle	South Korea	2005
2009Her#032	438	KBa021	4	5	4	12	2	4	3	3	6	43	8	4	4	3	3	6	91	176	B. abortus bv1	Cattle	South Korea	2005
2009Her#069	475	KBa058	4	5	4	12	2	4	3	3	6	43	8	5	4	3	3	7	91	176	B. abortus bv1	Cattle	South Korea	2007
2009Her#118	524	KBa107	4	5	4	12	2	4	3	3	6	43	8	4	4	3	3	6	91	176	B. abortus bv1	Cattle	South Korea	2004
2009Her#034	440	KBa023	4	5	4	12	2	7	3	3	6	43	8	4	4	3	3	6	92	177	B. abortus bv1	Cattle	South Korea	2005
2018Vergnaud#0884	4054	BCCN#00-6	4	5	3	12	2	2	3	1	6	43	8	4	5	5	4	4	36	72	B. abortus atypical	Cattle	Spain	2000
2006LeFleche#110	110	BCCN#93-15	4	5	3	12	2	2	3	1	6	43	8	4	5	6	4	3	36	72	B. abortus bv3	Cattle	Spain	1993
2006LeFleche#111	111	BCCN#93-26	3	5	4	11	2	2	3	3	6	41	8	6	8	3	7	7	34	63	B. abortus bv3	Dromedary	Sudan	1993
2018Vergnaud#0345	3515	BCCN#93-25	3	5	4	11	2	2	3	3	6	41	8	6	8	3	7	7	34	63	B. abortus bv3	Dromedary	Sudan	1993
2018Vergnaud#0346	3516	BCCN#93-27	3	5	4	11	2	2	3	3	6	41	8	6	8	3	7	7	34	63	B. abortus bv3	Dromedary	Sudan	1993
2006LeFleche#134	134	BfR 91	4	5	4	12	2	3	3	3	6	43	8	3	4	3	3	5	27	79	B. abortus bv1	Cattle	Switzerland	1996
2006LeFleche#139	139	BfR 99	4	5	4	12	2	2	3	3	6	43	8	3	5	3	4	6	28	82	B. abortus bv1	unknown	Switzerland	1972
2006LeFleche#145	145	BfR 124	2	5	3	12	2	2	3	1	6	45	8	4	9	6	3	3	38	68	B. abortus bv6	Cattle	Syria	1993
2006LeFleche#125	125	BfR 8	3	5	4	11	2	1	3	3	6	41	8	5	4	3	6	5	35	62	B. abortus bv6	Cattle	Tchad
2006LeFleche#124	124	BfR 7	3	5	4	11	2	2	3	3	6	41	8	6	4	3	8	4	34	63	B. abortus bv6	Cattle	Tchad
2018Vergnaud#0263	3433	BCCN#80-192	3	5	4	11	2	2	3	3	8	41	8	7	10	3	5	3	34	64	B. abortus bv3	Cattle	Togo	1980
2018Vergnaud#0264	3434	BCCN#80-193	3	5	4	11	2	2	3	3	8	41	8	7	10	3	5	3	34	64	B. abortus bv3	Cattle	Togo	1980
2018Vergnaud#0265	3435	BCCN#80-211	3	5	4	11	2	2	3	3	8	41	8	7	9	3	5	3	34	64	B. abortus bv3	Cattle	Togo	1980
2018Vergnaud#0266	3436	BCCN#79-142	3	5	4	11	2	2	3	3	8	41	8	7	10	3	5	3	34	64	B. abortus bv3	Cattle	Togo	1979
2018Vergnaud#0267	3437	BCCN#79-151	3	5	4	11	2	2	3	3	8	41	8	7	10	3	5	3	34	64	B. abortus bv3	Cattle	Togo	1979
2018Vergnaud#0311	3481	BCCN#79-150	3	5	4	11	2	2	3	3	8	41	8	7	5	7	5	3	34	64	B. abortus bv3	Cattle	Togo	1979
2018Vergnaud#0763	3933	BCCN#80-194	3	5	4	11	2	2	3	3	8	41	8	8	10	3	5	3	34	64	B. abortus bv3	Cattle	Togo	1980
2018Vergnaud#0764	3934	BCCN#80-195	3	5	4	11	2	2	3	3	8	41	8	7	10	3	5	3	34	64	B. abortus bv3	Cattle	Togo	1980
2018Vergnaud#1064	4234	BCCN#80-196	3	5	4	11	2	2	3	3	8	41	8	7	10	3	5	3	34	64	B. abortus bv3	Cattle	Togo	1980
2018Vergnaud#1065	4235	BCCN#80-197	3	5	4	11	2	2	3	3	8	41	8	7	10	3	5	3	34	64	B. abortus bv3	Cattle	Togo	1980
2018Vergnaud#1238	4408	BCCN#80-198	3	5	4	11	2	2	3	3	8	41	8	7	10	3	5	3	34	64	B. abortus bv3	Cattle	Togo	1980
2018Vergnaud#1239	4409	BCCN#80-199	3	5	4	11	2	2	3	3	8	41	8	7	10	3	5	3	34	64	B. abortus bv3	Cattle	Togo	1980
2018Vergnaud#1325	4495	BCCN#80-200	3	5	4	11	2	2	3	3	8	41	8	7	10	3	5	3	34	64	B. abortus bv3	Cattle	Togo	1980
2018Vergnaud#1326	4496	BCCN#80-201	3	5	4	11	2	2	3	3	8	41	8	7	10	3	5	3	34	64	B. abortus bv3	Cattle	Togo	1980
2018Vergnaud#1327	4497	BCCN#80-202	3	5	4	11	2	2	3	3	8	41	8	7	10	3	5	3	34	64	B. abortus bv3	Cattle	Togo	1980
2018Vergnaud#1328	4498	BCCN#80-203	3	5	4	11	2	2	3	3	8	41	8	7	10	3	5	3	34	64	B. abortus bv3	Cattle	Togo	1980
2018Vergnaud#1329	4499	BCCN#80-205	3	5	4	11	2	2	3	3	8	41	8	7	10	3	5	3	34	64	B. abortus bv3	Cattle	Togo	1980
2018Vergnaud#1330	4500	BCCN#80-206	3	5	4	11	2	2	3	3	8	41	8	7	10	3	5	3	34	64	B. abortus bv3	Cattle	Togo	1980
2018Vergnaud#1331	4501	BCCN#80-207	3	5	4	11	2	2	3	3	8	41	8	7	10	3	5	3	34	64	B. abortus bv3	Cattle	Togo	1980
2018Vergnaud#1332	4502	BCCN#80-208	3	5	4	11	2	2	3	3	8	41	8	7	4	3	5	3	34	64	B. abortus bv3	Cattle	Togo	1980
2018Vergnaud#1333	4503	BCCN#80-209	3	5	4	11	2	2	3	3	8	41	8	7	10	3	5	3	34	64	B. abortus bv3	Cattle	Togo	1980
2018Vergnaud#1334	4504	BCCN#80-210	3	5	4	11	2	2	3	3	8	41	8	7	10	3	5	3	34	64	B. abortus bv3	Cattle	Togo	1980
2018Vergnaud#1335	4505	BCCN#79-144	3	5	4	11	2	2	3	3	8	41	8	6	10	3	5	3	34	64	B. abortus bv3	Cattle	Togo	1979
2018Vergnaud#1336	4506	BCCN#79-145	3	5	4	11	2	2	3	3	8	41	8	8	10	3	5	3	34	64	B. abortus bv3	Cattle	Togo	1979
2018Vergnaud#1337	4507	BCCN#79-146	3	5	4	11	2	2	3	3	8	41	8	7	10	3	5	3	34	64	B. abortus bv3	Cattle	Togo	1979
2018Vergnaud#1338	4508	BCCN#79-147	3	5	4	11	2	2	3	3	8	41	8	7	10	3	5	3	34	64	B. abortus bv3	Cattle	Togo	1979
2018Vergnaud#1339	4509	BCCN#79-148	3	5	4	11	2	2	3	3	8	41	8	7	10	3	5	3	34	64	B. abortus bv3	Cattle	Togo	1979
2018Vergnaud#1340	4510	BCCN#79-149	3	5	4	11	2	2	3	3	8	41	8	7	10	3	5	3	34	64	B. abortus bv3	Cattle	Togo	1979
2011Kilic#093	1206	BRU-S093	1	5	3	12	2	2	3	1	6	43	8	6	6	6	3	3	86	69	B. abortus bv3	Human	Turkey	2006
2006LeFleche#203	203	BCCN#04-1	4	5	3	12	2	2	3	1	6	43	8	6	7	6	3	3	36	72	B. abortus bv7	unknown	Turkey	2004
2006LeFleche#004	4	REF Tulya	3	5	4	11	2	2	3	3	8	41	8	6	5	3	11	5	34	64	B. abortus bv3	Human	Uganda
2009Her#003	409	KRef03	3	5	4	11	2	2	3	3	8	41	8	5	5	3	11	5	34	64	B. abortus bv3	Human	Uganda
2012Ferreira#296	1591	REF 99W	4	5	4	12	2	2	3	3	6	43	8	3	5	3	4	6	28	82	B. abortus bv1	Cattle	United Kingdom
2018Vergnaud#0216	3386	BCCN#R4C	4	5	4	12	2	2	3	3	5	43	8	3	5	3	4	5	28	83	B. abortus bv1	Cattle	United Kingdom
2018Vergnaud#0217	3387	BCCN#R4D	4	5	4	12	2	2	3	3	5	43	8	3	5	3	4	5	28	83	B. abortus bv1	Cattle	United Kingdom
GCA_000018725	10006	S19 (NCTC 8038)	4	5	4	12	2	2	3	2	6	43	8	3	5	3	3	5	30	78	B. abortus	Cattle	United States	2008
SRR1371362	20300	RB51	4	5	4	12	2	3	3	3	6	43	8	3	7	3	3	5	27	79	B. abortus Rough	Human	United States
SRR1371304	20243	B01-0352	4	5	4	12	2	3	3	3	6	43	8	5	5	3	3	5	27	79	B. abortus	Cattle	United States
SRR1371374	20311	B94-1564	4	5	4	12	2	3	3	3	6	43	8	5	5	3	3	5	27	79	B. abortus	Cattle	United States
SRR1371363	20301	RB51	4	5	4	12	2	3	3	3	6	43	8	3	3	3	3	5	27	79	B. abortus Rough	Cattle	United States
SRR1371327	20265	B11-0202	4	5	4	12	2	3	3	3	6	43	8	3	5	3	3	8	27	79	B. abortus	Cattle	United States
SRR1371383	20320	B98-0688	4	5	4	12	2	3	3	3	6	43	8	4	4	3	6	6	27	79	B. abortus	Cattle	United States
SRR1371385	20322	B98-0862	4	5	4	12	2	3	3	3	6	43	8	3	5	3	3	5	27	79	B. abortus	Cattle	United States
2006LeFleche#120	120		4	5	4	12	2	3	3	3	6	43	8	3	7	3	3	5	27	79	B. abortus	Cattle	United States
2009Her#008	414	2308_KRef09	4	5	4	12	2	3	3	3	6	43	8	3	7	3	3	5	27	79	B. abortus bv1	Cattle	United States
2012Ferreira#300	1595	REF 2308	4	5	4	12	2	3	3	3	6	43	8	3	7	3	3	5	27	79	B. abortus bv1	Cattle	United States
2009Her#009	415	RB51_KRef10	4	5	4	12	2	3	3	3	6	43	8	3	7	3	3	5	27	79	B. abortus Rough	Cattle	United States
2012Ferreira#301	1596	RB51	4	5	4	12	2	3	3	3	6	43	8	3	7	3	3	5	27	79	B. abortus Rough	Cattle	United States
2015Shevtsov#030	2231	RB51	4	5	4	12	2	3	3	3	6	43	8	3	7	3	3	5	27	79	B. abortus Rough		United States
SRR3096342	20414	B02-0268	4	5	4	12	2	3	3	3	6	43	8	3	7	3	3	5	27	79	B. abortus	Deer/Elk/Reindeer	United States
SRR1371305	20244	B01-0650	4	5	4	12	2	2	3	3	6	43	8	3	4	3	4	7	28	82	B. abortus	Cattle	United States
SRR1371309	20248	B02-0187	4	5	4	12	2	2	3	3	6	43	8	3	4	3	6	7	28	82	B. abortus	Cattle	United States
SRR1371310	20249	B02-0219	4	5	4	12	2	2	3	3	6	43	8	3	4	3	4	6	28	82	B. abortus	Deer/Elk/Reindeer	United States
SRR1371317	20255	B06-0410	4	5	4	12	2	2	3	3	6	43	8	3	4	3	4	5	28	82	B. abortus	Cattle	United States
SRR1371321	20259	B10-0035	4	5	4	12	2	2	3	3	6	43	8	3	4	3	4	5	28	82	B. abortus	Cattle	United States
SRR1371367	20305	B93-0310	4	5	4	12	2	2	3	3	6	43	8	3	4	3	7	5	28	82	B. abortus	Cattle	United States
SRR1371372	20309	B94-0609	4	5	4	12	2	2	3	3	6	43	8	4	6	3	6	4	28	82	B. abortus	Cattle	United States
SRR1371386	20323	B99-0074	4	5	4	12	2	2	3	3	6	43	8	3	5	3	4	6	28	82	B. abortus	Cattle	United States
SRR1371368	20306	B93-0623	4	5	4	12	2	2	3	3	6	43	8	3	5	3	4	5	28	82	B. abortus	Cattle	United States
SRR1371373	20310	B94-0885	4	5	4	12	2	2	3	3	6	43	8	3	6	3	4	5	28	82	B. abortus	Cattle	United States
SRR1371318	20256	B07-0266	4	5	4	12	2	2	3	3	6	43	8	3	6	3	6	5	28	82	B. abortus	Cattle	United States
SRR1371319	20257	B08-0416	4	5	4	12	2	2	3	3	6	43	8	3	6	3	6	5	28	82	B. abortus	Cattle	United States
SRR1371322	20260	B11-0011	4	5	4	12	2	2	3	3	6	43	8	3	4	3	5	5	28	82	B. abortus	Bison	United States
SRR1371331	20269	B11-0604	4	5	4	12	2	2	3	3	6	43	8	3	6	3	6	5	28	82	B. abortus	Cattle	United States
SRR1371334	20272	B12-0028	4	5	4	12	2	2	3	3	6	43	8	3	4	3	8	5	28	82	B. abortus	Bison	United States
SRR1371361	20299	B13-0215	4	5	4	12	2	2	3	3	6	43	8	3	6	3	7	5	28	82	B. abortus	Cattle	United States
SRR1371307	20246	B02-0120	4	5	4	12	2	2	3	3	6	43	8	3	7	3	5	5	28	82	B. abortus	Cattle	United States
SRR1371378	20315	B96-0217	4	5	4	12	2	2	3	3	6	43	8	3	5	3	4	5	28	82	B. abortus	Cattle	United States
SRR1371379	20316	19	4	5	4	12	2	2	3	3	6	43	8	3	5	3	3	5	28	82	B. abortus	Cattle	United States
SRR1371382	20319	B98-0370	4	5	4	12	2	2	3	3	6	43	8	3	3	3	9	7	28	82	B. abortus	Cattle	United States
SRR1371387	20324	B99-0096	4	5	4	12	2	2	3	3	6	43	8	3	6	3	7	7	28	82	B. abortus	Cattle	United States
SRR1371388	20325	B99-1033	4	5	4	12	2	2	3	3	6	43	8	3	4	3	4	8	28	82	B. abortus	Cattle	United States
SRR1371323	20261	B11-0015	4	5	4	12	2	2	3	3	6	43	8	3	4	3	6	7	28	82	B. abortus	Cattle	United States
SRR1371324	20262	B11-0037	4	5	4	12	2	2	3	3	6	43	8	3	5	3	6	6	28	82	B. abortus	Cattle	United States
SRR1371325	20263	B11-0038	4	5	4	12	2	2	3	3	6	43	8	3	4	3	6	7	28	82	B. abortus	Cattle	United States
SRR1371326	20264	B11-0053	4	5	4	12	2	2	3	3	6	43	8	3	4	3	4	6	28	82	B. abortus	Bison	United States
SRR1371328	20266	B11-0208	4	5	4	12	2	2	3	3	6	43	8	3	4	3	6	6	28	82	B. abortus	Cattle	United States
SRR1371329	20267	B11-0210	4	5	4	12	2	2	3	3	6	43	8	3	4	3	6	6	28	82	B. abortus	Cattle	United States
SRR1371330	20268	B11-0245	4	5	4	12	2	2	3	3	6	43	8	3	4	3	6	6	28	82	B. abortus	Cattle	United States
SRR1371332	20270	B12-0002	4	5	4	12	2	2	3	3	6	43	8	3	4	3	6	6	28	82	B. abortus	Cattle	United States
SRR1371333	20271	B12-0025	4	5	4	12	2	2	3	3	6	43	8	3	4	3	6	6	28	82	B. abortus	Cattle	United States
SRR1371335	20273	B12-0219	4	5	4	12	2	2	3	3	6	43	8	3	4	3	4	6	28	82	B. abortus	Bison	United States
SRR1371336	20274	B12-0228	4	5	4	12	2	2	3	3	6	43	8	3	4	3	4	6	28	82	B. abortus	Bison	United States
SRR1371337	20275	B12-0230	4	5	4	12	2	2	3	3	6	43	8	3	4	3	4	6	28	82	B. abortus	Bison	United States
SRR1371338	20276	B12-0232	4	5	4	12	2	2	3	3	6	43	8	3	4	3	4	6	28	82	B. abortus	Bison	United States
SRR1371339	20277	B12-0233	4	5	4	12	2	2	3	3	6	43	8	3	4	3	4	6	28	82	B. abortus	Bison	United States
SRR1371340	20278	B12-0234	4	5	4	12	2	2	3	3	6	43	8	3	4	3	4	6	28	82	B. abortus	Bison	United States
SRR1371341	20279	B12-0235	4	5	4	12	2	2	3	3	6	43	8	3	4	3	4	6	28	82	B. abortus	Bison	United States
SRR1371342	20280	B12-0238	4	5	4	12	2	2	3	3	6	43	8	3	4	3	4	6	28	82	B. abortus	Bison	United States
SRR1371343	20281	B12-0240	4	5	4	12	2	2	3	3	6	43	8	3	4	3	4	7	28	82	B. abortus	Bison	United States
SRR1371344	20282	B12-0241	4	5	4	12	2	2	3	3	6	43	8	3	4	3	4	6	28	82	B. abortus	Bison	United States
SRR1371345	20283	B12-0242	4	5	4	12	2	2	3	3	6	43	8	3	4	3	4	6	28	82	B. abortus	Bison	United States
SRR1371346	20284	B12-0243	4	5	4	12	2	2	3	3	6	43	8	3	4	3	4	6	28	82	B. abortus	Bison	United States
SRR1371347	20285	B12-0250	4	5	4	12	2	2	3	3	6	43	8	3	4	3	4	6	28	82	B. abortus	Bison	United States
SRR1371348	20286	B12-0252	4	5	4	12	2	2	3	3	6	43	8	3	4	3	4	6	28	82	B. abortus	Bison	United States
SRR1371349	20287	B12-0256	4	5	4	12	2	2	3	3	6	43	8	3	4	3	4	6	28	82	B. abortus	Bison	United States
SRR1371350	20288	B12-0266	4	5	4	12	2	2	3	3	6	43	8	3	4	3	4	6	28	82	B. abortus	Bison	United States
SRR1371351	20289	B12-0268	4	5	4	12	2	2	3	3	6	43	8	3	4	3	4	6	28	82	B. abortus	Bison	United States
SRR1371352	20290	B12-0270	4	5	4	12	2	2	3	3	6	43	8	3	4	3	4	6	28	82	B. abortus	Bison	United States
SRR1371353	20291	B12-0271	4	5	4	12	2	2	3	3	6	43	8	3	4	3	4	6	28	82	B. abortus	Bison	United States
SRR1371354	20292	B12-0275	4	5	4	12	2	2	3	3	6	43	8	3	4	3	4	6	28	82	B. abortus	Bison	United States
SRR1371355	20293	B12-0276	4	5	4	12	2	2	3	3	6	43	8	3	4	3	4	6	28	82	B. abortus	Bison	United States
SRR1371356	20294	B12-0277	4	5	4	12	2	2	3	3	6	43	8	3	4	3	4	6	28	82	B. abortus	Bison	United States
SRR1371358	20296	B12-0425	4	5	4	12	2	2	3	3	6	43	8	3	4	3	4	6	28	82	B. abortus	Bison	United States
SRR1371359	20297	B12-0429	4	5	4	12	2	2	3	3	6	43	8	3	3	3	4	6	28	82	B. abortus	Bison	United States
SRR1371360	20298	B12-0431	4	5	4	12	2	2	3	3	6	43	8	3	4	3	4	6	28	82	B. abortus	Bison	United States
SRR1371364	20302	B89-0941	4	5	4	12	2	2	3	3	6	43	8	3	4	3	6	6	28	82	B. abortus	Cattle	United States
SRR1371365	20303	B89-0944	4	5	4	12	2	2	3	3	6	43	8	3	4	3	6	6	28	82	B. abortus	Cattle	United States
2006LeFleche#107	107	BCCN#V1	4	5	4	12	2	2	3	3	6	43	8	3	5	3	3	5	28	82	B. abortus bv1	Cattle	United States
2009Her#010	416	KRef13	4	5	4	12	2	2	3	3	6	43	8	3	5	3	3	5	28	82	B. abortus bv1	Cattle	United States
2009Her#011	417	KRef15	4	5	4	12	2	2	3	3	6	43	8	3	6	3	3	5	28	82	B. abortus bv1	Cattle	United States
2012Ferreira#297	1592	S19	4	5	4	12	2	2	3	3	6	43	8	3	5	3	3	5	28	82	B. abortus bv1	Cattle	United States
2018Vergnaud#0218	3388	BCCN#V1B	4	5	4	12	2	2	3	3	6	43	8	3	5	3	3	5	28	82	B. abortus bv1	Cattle	United States
SRR3096334	20406	B02-0204	4	5	4	12	2	2	3	3	6	43	8	3	4	3	6	6	28	82	B. abortus	Cattle	United States
SRR3096335	20407	B02-0235	4	5	4	12	2	2	3	3	6	43	8	3	4	3	6	6	28	82	B. abortus	Cattle	United States
SRR3096336	20408	B02-0236	4	5	4	12	2	2	3	3	6	43	8	3	4	3	6	6	28	82	B. abortus	Cattle	United States
SRR3096337	20409	B02-0237	4	5	4	12	2	2	3	3	6	43	8	3	4	3	6	6	28	82	B. abortus	Cattle	United States
SRR3096338	20410	B02-0239	4	5	4	12	2	2	3	3	6	43	8	3	4	3	6	6	28	82	B. abortus	Cattle	United States
SRR3096339	20411	B02-0241	4	5	4	12	2	2	3	3	6	43	8	3	4	3	6	6	28	82	B. abortus	Cattle	United States
SRR3096340	20412	B02-0242	4	5	4	12	2	2	3	3	6	43	8	3	4	3	6	6	28	82	B. abortus	Cattle	United States
SRR3096345	20417	B03-0202	4	5	4	12	2	2	3	3	6	43	8	3	4	3	4	6	28	82	B. abortus	Deer/Elk/Reindeer	United States
SRR3096361	20433	B06-0027	4	5	4	12	2	2	3	3	6	43	8	3	4	3	4	5	28	82	B. abortus	Cattle	United States
SRR3096362	20434	B06-0028	4	5	4	12	2	2	3	3	6	43	8	3	4	3	4	5	28	82	B. abortus	Cattle	United States
SRR3096363	20435	B06-0031	4	5	4	12	2	2	3	3	6	43	8	3	4	3	4	6	28	82	B. abortus	Cattle	United States
SRR3096365	20437	B08-0056	4	5	4	12	2	2	3	3	6	43	8	3	4	3	4	5	28	82	B. abortus	Cattle	United States
SRR3096387	20457	B10-0018	4	5	4	12	2	2	3	3	6	43	8	3	4	3	4	5	28	82	B. abortus	Cattle	United States
SRR3096388	20458	B10-0028	4	5	4	12	2	2	3	3	6	43	8	3	4	3	4	5	28	82	B. abortus	Cattle	United States
SRR3096391	20461	B10-0173	4	5	4	12	2	2	3	3	6	43	8	3	4	3	4	5	28	82	B. abortus	Cattle	United States
SRR3096397	20467	B10-0407	4	5	4	12	2	2	3	3	6	43	8	3	4	3	4	5	28	82	B. abortus	Cattle	United States
SRR3096398	20468	B10-0474	4	5	4	12	2	2	3	3	6	43	8	3	4	3	4	5	28	82	B. abortus	Cattle	United States
SRR3096405	20475	B10-0654	4	5	4	12	2	2	3	3	6	43	8	3	4	3	4	5	28	82	B. abortus	Cattle	United States
SRR3096406	20476	B10-0948	4	5	4	12	2	2	3	3	6	43	8	3	4	3	4	5	28	82	B. abortus	Cattle	United States
SRR3096458	20527	B12-0359	4	5	4	12	2	2	3	3	6	43	8	3	4	3	4	5	28	82	B. abortus	Cattle	United States
SRR3096459	20528	B12-0360	4	5	4	12	2	2	3	3	6	43	8	3	4	3	4	5	28	82	B. abortus	Cattle	United States
SRR3096461	20530	B12-0389	4	5	4	12	2	2	3	3	6	43	8	3	4	3	4	5	28	82	B. abortus	Cattle	United States
SRR3096462	20531	B12-0390	4	5	4	12	2	2	3	3	6	43	8	3	4	3	4	5	28	82	B. abortus	Cattle	United States
SRR3096486	20555	B12-0570	4	5	4	12	2	2	3	3	6	43	8	3	4	3	4	5	28	82	B. abortus	Cattle	United States
SRR3096491	20560	B12-0599	4	5	4	12	2	2	3	3	6	43	8	3	4	3	4	5	28	82	B. abortus	Cattle	United States
SRR3096502	20571	B13-0118	4	5	4	12	2	2	3	3	6	43	8	3	4	3	4	5	28	82	B. abortus	Cattle	United States
SRR3096332	20404	B02-0137	4	5	4	12	2	2	3	3	6	43	8	3	6	3	8	5	28	82	B. abortus	Bison	United States
SRR3096333	20405	B02-0186	4	5	4	12	2	2	3	3	6	43	8	3	5	3	6	5	28	82	B. abortus	Bison	United States
SRR3096344	20416	B03-0136	4	5	4	12	2	2	3	3	6	43	8	3	6	3	6	5	28	82	B. abortus	Bison	United States
SRR3096358	20430	B05-0908	4	5	4	12	2	2	3	3	6	43	8	3	4	3	6	5	28	82	B. abortus	Deer/Elk/Reindeer	United States
SRR3096360	20432	B05-1282	4	5	4	12	2	2	3	3	6	43	8	3	6	3	6	6	28	82	B. abortus	Bison	United States
SRR3096366	20438	B08-0151	4	5	4	12	2	2	3	3	6	43	8	3	6	3	6	5	28	82	B. abortus	Deer/Elk/Reindeer	United States
SRR3096367	20439	B08-0187	4	5	4	12	2	2	3	3	6	43	8	3	8	3	9	5	28	82	B. abortus	Deer/Elk/Reindeer	United States
SRR3096368	20440	B08-0404	4	5	4	12	2	2	3	3	6	43	8	3	6	3	7	5	28	82	B. abortus	Bison	United States
SRR3096369	20441	B08-0423	4	5	4	12	2	2	3	3	6	43	8	3	7	3	6	5	28	82	B. abortus	Bison	United States
SRR3096370	20442	B08-0440	4	5	4	12	2	2	3	3	6	43	8	3	5	3	4	5	28	82	B. abortus	Bison	United States
SRR3096373	20444	B08-0795	4	5	4	12	2	2	3	3	6	43	8	3	6	3	6	5	28	82	B. abortus	Bison	United States
SRR3096374	20445	B08-0921	4	5	4	12	2	2	3	3	6	43	8	3	6	3	6	5	28	82	B. abortus	Bison	United States
SRR3096375	20446	B08-0951	4	5	4	12	2	2	3	3	6	43	8	3	6	3	6	5	28	82	B. abortus	Bison	United States
SRR3096376	20447	B08-1019	4	5	4	12	2	2	3	3	6	43	8	3	6	3	6	5	28	82	B. abortus	Bison	United States
SRR3096377	20448	B08-1080	4	5	4	12	2	2	3	3	6	43	8	3	6	3	7	5	28	82	B. abortus	Bison	United States
SRR3096383	20453	B09-0286	4	5	4	12	2	2	3	3	6	43	8	3	6	3	5	5	28	82	B. abortus	Deer/Elk/Reindeer	United States
SRR3096384	20454	B09-0295	4	5	4	12	2	2	3	3	6	43	8	3	4	3	5	5	28	82	B. abortus	Deer/Elk/Reindeer	United States
SRR3096385	20455	B09-0443	4	5	4	12	2	2	3	3	6	43	8	3	4	3	5	5	28	82	B. abortus	Deer/Elk/Reindeer	United States
SRR3096386	20456	B09-0553	4	5	4	12	2	2	3	3	6	43	8	3	6	3	7	5	28	82	B. abortus	Bison	United States
SRR3096389	20459	B10-0091	4	5	4	12	2	2	3	3	6	43	8	3	4	3	5	5	28	82	B. abortus	Deer/Elk/Reindeer	United States
SRR3096390	20460	B10-0118	4	5	4	12	2	2	3	3	6	43	8	3	6	3	7	5	28	82	B. abortus	Deer/Elk/Reindeer	United States
SRR3096392	20462	B10-0203	4	5	4	12	2	2	3	3	6	43	8	4	5	3	4	5	28	82	B. abortus	Deer/Elk/Reindeer	United States
SRR3096394	20464	B10-0252	4	5	4	12	2	2	3	3	6	43	8	3	4	3	8	5	28	82	B. abortus	Deer/Elk/Reindeer	United States
SRR3096395	20465	B10-0273	4	5	4	12	2	2	3	3	6	43	8	3	6	3	6	5	28	82	B. abortus	Deer/Elk/Reindeer	United States
SRR3096396	20466	B10-0325	4	5	4	12	2	2	3	3	6	43	8	4	5	3	4	5	28	82	B. abortus	Deer/Elk/Reindeer	United States
SRR3096399	20469	B10-0514	4	5	4	12	2	2	3	3	6	43	8	3	4	3	5	5	28	82	B. abortus	Deer/Elk/Reindeer	United States
SRR3096400	20470	B10-0517	4	5	4	12	2	2	3	3	6	43	8	3	4	3	6	5	28	82	B. abortus	Deer/Elk/Reindeer	United States
SRR3096401	20471	B10-0529	4	5	4	12	2	2	3	3	6	43	8	3	6	3	7	5	28	82	B. abortus	Deer/Elk/Reindeer	United States
SRR3096402	20472	B10-0566	4	5	4	12	2	2	3	3	6	43	8	3	4	3	8	5	28	82	B. abortus	Deer/Elk/Reindeer	United States
SRR3096403	20473	B10-0584	4	5	4	12	2	2	3	3	6	43	8	3	5	3	6	11	28	82	B. abortus	Deer/Elk/Reindeer	United States
SRR3096408	20477	B10-0975	4	5	4	12	2	2	3	3	6	43	8	3	6	3	6	5	28	82	B. abortus	Bison	United States
SRR3096410	20479	B11-0131	4	5	4	12	2	2	3	3	6	43	8	3	4	3	5	5	28	82	B. abortus	Deer/Elk/Reindeer	United States
SRR3096446	20515	B11-0442	4	5	4	12	2	2	3	3	6	43	8	3	5	3	7	5	28	82	B. abortus	Bison	United States
SRR3096447	20516	B11-0469	4	5	4	12	2	2	3	3	6	43	8	3	4	3	5	5	28	82	B. abortus	Bison	United States
SRR3096448	20517	B11-0473	4	5	4	12	2	2	3	3	6	43	8	3	4	3	5	5	28	82	B. abortus	Bison	United States
SRR3096449	20518	B11-0480	4	5	4	12	2	2	3	3	6	43	8	3	6	3	6	5	28	82	B. abortus	Bison	United States
SRR3096450	20519	B11-0488	4	5	4	12	2	2	3	3	6	43	8	3	6	3	5	5	28	82	B. abortus	Bison	United States
SRR3096451	20520	B11-0574	4	5	4	12	2	2	3	3	6	43	8	3	6	3	5	5	28	82	B. abortus	Bison	United States
SRR3096452	20521	B11-0611	4	5	4	12	2	2	3	3	6	43	8	3	6	3	6	5	28	82	B. abortus	Cattle	United States
SRR3096453	20522	B11-0612	4	5	4	12	2	2	3	3	6	43	8	3	6	3	6	5	28	82	B. abortus	Cattle	United States
SRR3096454	20523	B11-0613	4	5	4	12	2	2	3	3	6	43	8	3	6	3	6	5	28	82	B. abortus	Cattle	United States
SRR3096455	20524	B11-0616	4	5	4	12	2	2	3	3	6	43	8	3	6	3	6	5	28	82	B. abortus	Cattle	United States
SRR3096460	20529	B12-0385	4	5	4	12	2	2	3	3	6	43	8	4	6	3	4	5	28	82	B. abortus	Deer/Elk/Reindeer	United States
SRR3096463	20532	B12-0393	4	5	4	12	2	2	3	3	6	43	8	4	5	3	4	5	28	82	B. abortus	Deer/Elk/Reindeer	United States
SRR3096485	20554	B12-0460	4	5	4	12	2	2	3	3	6	43	8	3	6	3	5	5	28	82	B. abortus	Bison	United States
SRR3096487	20556	B12-0578	4	5	4	12	2	2	3	3	6	43	8	3	4	3	5	5	28	82	B. abortus	Bison	United States
SRR3096488	20557	B12-0583	4	5	4	12	2	2	3	3	6	43	8	3	4	3	5	5	28	82	B. abortus	Bison	United States
SRR3096489	20558	B12-0585	4	5	4	12	2	2	3	3	6	43	8	3	4	3	5	5	28	82	B. abortus	Bison	United States
SRR3096490	20559	B12-0587	4	5	4	12	2	2	3	3	6	43	8	3	4	3	5	5	28	82	B. abortus	Bison	United States
SRR3096492	20561	B12-0602	4	5	4	12	2	2	3	3	6	43	8	3	4	3	5	5	28	82	B. abortus	Bison	United States
SRR3096493	20562	B13-0061	4	5	4	12	2	2	3	3	6	43	8	3	6	3	5	5	28	82	B. abortus	Bison	United States
SRR3096494	20563	B13-0083	4	5	4	12	2	2	3	3	6	43	8	3	6	3	5	5	28	82	B. abortus	Bison	United States
SRR3096495	20564	B13-0086	4	5	4	12	2	2	3	3	6	43	8	3	6	3	5	5	28	82	B. abortus	Bison	United States
SRR3096496	20565	B13-0088	4	5	4	12	2	2	3	3	6	43	8	3	4	3	5	5	28	82	B. abortus	Bison	United States
SRR3096497	20566	B13-0090	4	5	4	12	2	2	3	3	6	43	8	3	5	3	5	5	28	82	B. abortus	Bison	United States
SRR3096498	20567	B13-0091	4	5	4	12	2	2	3	3	6	43	8	3	6	3	5	5	28	82	B. abortus	Bison	United States
SRR3096500	20569	B13-0097	4	5	4	12	2	2	3	3	6	43	8	3	6	3	5	5	28	82	B. abortus	Bison	United States
SRR3096501	20570	B13-0101	4	5	4	12	2	2	3	3	6	43	8	3	6	3	8	5	28	82	B. abortus	Bison	United States
SRR3096323	20396	B01-0154	4	5	4	12	2	2	3	3	6	43	8	3	6	3	6	5	28	82	B. abortus	Bison	United States
SRR3096324	20397	B01-0174	4	5	4	12	2	2	3	3	6	43	8	3	6	3	6	5	28	82	B. abortus	Bison	United States
SRR3096326	20398	B01-0305	4	5	4	12	2	2	3	3	6	43	8	3	7	3	8	5	28	82	B. abortus	Bison	United States
SRR3096327	20399	B01-0308	4	5	4	12	2	2	3	3	6	43	8	3	7	3	8	5	28	82	B. abortus	Bison	United States
SRR3096328	20400	B01-0314	4	5	4	12	2	2	3	3	6	43	8	3	6	3	7	5	28	82	B. abortus	Bison	United States
SRR3096329	20401	B01-0505	4	5	4	12	2	2	3	3	6	43	8	3	6	3	5	5	28	82	B. abortus	Bison	United States
SRR3096343	20415	B-02W2693	4	5	4	12	2	2	3	3	6	43	8	3	4	3	5	5	28	82	B. abortus	Deer/Elk/Reindeer	United States
SRR3096347	20419	B04-0060	4	5	4	12	2	2	3	3	6	43	8	3	4	3	6	5	28	82	B. abortus	Cattle	United States
SRR3096348	20420	B04-0067	4	5	4	12	2	2	3	3	6	43	8	3	4	3	6	5	28	82	B. abortus	Cattle	United States
SRR3096349	20421	B04-0083	4	5	4	12	2	2	3	3	6	43	8	3	4	3	6	5	28	82	B. abortus	Cattle	United States
SRR3096351	20423	B04-0224	4	5	4	12	2	2	3	3	6	43	8	3	4	3	5	5	28	82	B. abortus	Deer/Elk/Reindeer	United States
SRR3096352	20424	B04-0225	4	5	4	12	2	2	3	3	6	43	8	3	4	3	5	5	28	82	B. abortus	Deer/Elk/Reindeer	United States
SRR3096353	20425	B05-0014	4	5	4	12	2	2	3	3	6	43	8	3	5	3	4	5	28	82	B. abortus	Deer/Elk/Reindeer	United States
SRR3096354	20426	B05-0018	4	5	4	12	2	2	3	3	6	43	8	3	4	3	7	5	28	82	B. abortus	Bison	United States
SRR3096355	20427	B05-0019	4	5	4	12	2	2	3	3	6	43	8	3	4	3	8	5	28	82	B. abortus	Bison	United States
SRR3096359	20431	B05-0999	4	5	4	12	2	2	3	3	6	43	8	3	6	3	6	5	28	82	B. abortus	Bison	United States
SRR3096364	20436	B-07-3128	4	5	4	12	2	2	3	3	6	43	8	3	4	3	4	5	28	82	B. abortus	Deer/Elk/Reindeer	United States
SRR3096393	20463	B-10021001	4	5	4	12	2	2	3	3	6	43	8	3	4	3	6	5	28	82	B. abortus	Deer/Elk/Reindeer	United States
SRR3096404	20474	B-10061002	4	5	4	12	2	2	3	3	6	43	8	3	4	3	7	6	28	82	B. abortus	Deer/Elk/Reindeer	United States
SRR3096409	20478	B-102110002TD	4	5	4	12	2	2	3	3	6	43	8	3	4	3	5	6	28	82	B. abortus	Deer/Elk/Reindeer	United States
SRR3096412	20481	B11-0141	4	5	4	12	2	2	3	3	6	43	8	3	4	3	9	5	28	82	B. abortus	Bison	United States
SRR3096413	20482	B11-0142	4	5	4	12	2	2	3	3	6	43	8	3	5	3	4	5	28	82	B. abortus	Deer/Elk/Reindeer	United States
SRR3096414	20483	B11-0143	4	5	4	12	2	2	3	3	6	43	8	3	5	3	5	5	28	82	B. abortus	Deer/Elk/Reindeer	United States
SRR3096415	20484	B11-0144	4	5	4	12	2	2	3	3	6	43	8	3	5	3	4	5	28	82	B. abortus	Deer/Elk/Reindeer	United States
SRR3096416	20485	B11-0145	4	5	4	12	2	2	3	3	6	43	8	3	5	3	5	5	28	82	B. abortus	Deer/Elk/Reindeer	United States
SRR3096418	20487	B11-0147	4	5	4	12	2	2	3	3	6	43	8	3	4	3	5	5	28	82	B. abortus	Deer/Elk/Reindeer	United States
SRR3096425	20494	B11-0248	4	5	4	12	2	2	3	3	6	43	8	3	4	3	9	5	28	82	B. abortus	Bison	United States
SRR3096426	20495	B11-0249	4	5	4	12	2	2	3	3	6	43	8	3	4	3	6	5	28	82	B. abortus	Bison	United States
SRR3096431	20500	B11-0254	4	5	4	12	2	2	3	3	6	43	8	3	5	3	5	5	28	82	B. abortus	Bison	United States
SRR3096433	20502	B11-0256	4	5	4	12	2	2	3	3	6	43	8	3	4	3	4	5	28	82	B. abortus	Bison	United States
SRR3096434	20503	B11-0257	4	5	4	12	2	2	3	3	6	43	8	3	4	3	10	5	28	82	B. abortus	Bison	United States
SRR3096435	20504	B11-0258	4	5	4	12	2	2	3	3	6	43	8	3	5	3	5	5	28	82	B. abortus	Bison	United States
SRR3096437	20506	B11-0260	4	5	4	12	2	2	3	3	6	43	8	3	5	3	5	5	28	82	B. abortus	Bison	United States
SRR3096438	20507	B11-0261	4	5	4	12	2	2	3	3	6	43	8	3	5	3	4	5	28	82	B. abortus	Bison	United States
SRR3096439	20508	B11-0262	4	5	4	12	2	2	3	3	6	43	8	3	5	3	5	5	28	82	B. abortus	Bison	United States
SRR3096440	20509	B11-0268	4	5	4	12	2	2	3	3	6	43	8	3	4	3	4	5	28	82	B. abortus	Deer/Elk/Reindeer	United States
SRR3096441	20510	B11-0270	4	5	4	12	2	2	3	3	6	43	8	3	4	3	4	6	28	82	B. abortus	Deer/Elk/Reindeer	United States
SRR3096442	20511	B11-0271	4	5	4	12	2	2	3	3	6	43	8	3	4	3	4	6	28	82	B. abortus	Deer/Elk/Reindeer	United States
SRR3096443	20512	B11-0273	4	5	4	12	2	2	3	3	6	43	8	3	4	3	6	6	28	82	B. abortus	Deer/Elk/Reindeer	United States
SRR3096444	20513	B11-0277	4	5	4	12	2	2	3	3	6	43	8	3	4	3	4	5	28	82	B. abortus	Deer/Elk/Reindeer	United States
SRR3096445	20514	B-11031001	4	5	4	12	2	2	3	3	6	43	8	3	4	3	6	5	28	82	B. abortus	Deer/Elk/Reindeer	United States
SRR3096456	20525	B-11121001	4	5	4	12	2	2	3	3	6	43	8	3	4	3	5	6	28	82	B. abortus	Deer/Elk/Reindeer	United States
SRR3096465	20534	B12-0399	4	5	4	12	2	2	3	3	6	43	8	3	4	3	4	5	28	82	B. abortus	Deer/Elk/Reindeer	United States
SRR3096472	20541	B12-0407	4	5	4	12	2	2	3	3	6	43	8	3	4	3	4	6	28	82	B. abortus	Deer/Elk/Reindeer	United States
SRR3096473	20542	B12-0408	4	5	4	12	2	2	3	3	6	43	8	3	4	3	4	6	28	82	B. abortus	Deer/Elk/Reindeer	United States
SRR3096474	20543	B12-0409	4	5	4	12	2	2	3	3	6	43	8	3	5	2	4	5	28	82	B. abortus	Deer/Elk/Reindeer	United States
SRR3096475	20544	B12-0410	4	5	4	12	2	2	3	3	6	43	8	3	4	3	4	6	28	82	B. abortus	Deer/Elk/Reindeer	United States
SRR3096476	20545	B12-0411	4	5	4	12	2	2	3	3	6	43	8	3	4	3	4	5	28	82	B. abortus	Deer/Elk/Reindeer	United States
SRR3096477	20546	B12-0412	4	5	4	12	2	2	3	3	6	43	8	3	5	3	4	5	28	82	B. abortus	Deer/Elk/Reindeer	United States
SRR3096478	20547	B12-0413	4	5	4	12	2	2	3	3	6	43	8	3	4	3	7	5	28	82	B. abortus	Deer/Elk/Reindeer	United States
SRR3096479	20548	B12-0414	4	5	4	12	2	2	3	3	6	43	8	3	5	3	4	5	28	82	B. abortus	Deer/Elk/Reindeer	United States
SRR3096480	20549	B12-0415	4	5	4	12	2	2	3	3	6	43	8	3	5	3	4	5	28	82	B. abortus	Deer/Elk/Reindeer	United States
SRR3096483	20552	B12-0418	4	5	4	12	2	2	3	3	6	43	8	3	5	3	6	5	28	82	B. abortus	Deer/Elk/Reindeer	United States
SRR3096484	20553	B12-0419	4	5	4	12	2	2	3	3	6	43	8	3	5	3	5	5	28	82	B. abortus	Bison	United States
GCA_000008145	10003	9-941	4	5	4	12	2	2	3	3	6	43	8	3	4	3	6	6	28	82	B. abortus bv1	Cattle	United States	2005
SRR1371369	20307	B93-0824	4	5	4	12	1	2	3	3	6	43	8	1	4	3	5	6	32	182	B. abortus	Cattle	United States
SRR1371371	20308	B94-0500	4	5	4	12	1	2	3	3	6	43	8	1	4	3	6	6	32	182	B. abortus	Cattle	United States
SRR1371380	20317	B96-0242	4	5	4	12	1	2	3	3	6	43	8	1	4	3	6	6	32	182	B. abortus	Cattle	United States
SRR1371384	20321	B98-0822	4	5	4	12	1	2	3	3	6	43	8	1	4	3	6	6	32	182	B. abortus	Cattle	United States
SRR3096436	20505	B11-0259	4	5	4	12	1	2	3	3	6	43	8	3	5	3	5	5	32	182	B. abortus	Cattle	United States
SRR1371357	20295	B12-0332	4	5	3	12	2	2	3	3	6	43	8	4	5	3	4	8	112	210	B. abortus	Bison	United States
SRR1371377	20314	B95-1140	4	5	3	12	2	2	3	3	6	43	8	3	4	3	5	4	112	210	B. abortus	Cattle	United States
SRR1371375	20312	B95-0116	4	5	3	12	2	2	3	3	6	43	8	3	6	3	5	4	112	210	B. abortus	Cattle	United States
SRR1371300	20239	B00-0092	4	5	3	12	2	2	3	3	6	43	8	3	6	3	6	4	112	210	B. abortus	Cattle	United States
SRR1371301	20240	B00-0220	4	5	3	12	2	2	3	3	6	43	8	3	4	3	10	4	112	210	B. abortus	Cattle	United States
SRR1371302	20241	B00-0624	4	5	3	12	2	2	3	3	6	43	8	3	3	3	9	4	112	210	B. abortus	Cattle	United States
SRR1371303	20242	B00-0751	4	5	3	12	2	2	3	3	6	43	8	3	6	3	4	4	112	210	B. abortus	Cattle	United States
SRR1371306	20245	B02-0040	4	5	3	12	2	2	3	3	6	43	8	4	4	3	7	4	112	210	B. abortus	Cattle	United States
SRR1371312	20251	B04-0031	4	5	3	12	2	2	3	3	6	43	8	3	5	3	4	7	112	210	B. abortus	Cattle	United States
SRR1371381	20318	B98-0001	4	5	3	12	2	2	3	3	6	43	8	3	6	3	3	4	112	210	B. abortus	Cattle	United States
SRR1371316	20254	B05-0022	4	5	3	12	2	2	3	3	6	43	8	3	5	3	4	8	112	210	B. abortus	Cattle	United States
SRR1371320	20258	B08-0665	4	5	3	12	2	2	3	3	6	43	8	3	5	3	4	7	112	210	B. abortus	Cattle	United States
SRR3096330	20402	B01-0638	4	5	3	12	2	2	3	3	6	43	8	3	5	3	4	7	112	210	B. abortus	Deer/Elk/Reindeer	United States
SRR3096331	20403	B01-0642	4	5	3	12	2	2	3	3	6	43	8	3	5	3	4	7	112	210	B. abortus	Deer/Elk/Reindeer	United States
SRR3096341	20413	B02-0246	4	5	3	12	2	2	3	3	6	43	8	3	4	3	4	7	112	210	B. abortus	Deer/Elk/Reindeer	United States
SRR3096350	20422	B04-0196	4	5	3	12	2	2	3	3	6	43	8	3	5	3	4	7	112	210	B. abortus	Deer/Elk/Reindeer	United States
SRR3096357	20429	B05-0756	4	5	3	12	2	2	3	3	6	43	8	3	5	3	4	8	112	210	B. abortus	Deer/Elk/Reindeer	United States
SRR3096457	20526	B12-0333	4	5	3	12	2	2	3	3	6	43	8	3	5	3	4	8	112	210	B. abortus	Bison	United States
SRR3096499	20568	B13-0093	4	5	3	12	2	2	3	3	6	43	8	4	5	3	4	8	112	210	B. abortus	Bison	United States
SRR3096356	20428	B05-0338	4	5	3	12	2	2	3	3	6	43	8	3	5	3	4	8	112	210	B. abortus	Cattle	United States
SRR3096371	20443	B08-0666	4	5	3	12	2	2	3	3	6	43	8	3	5	3	4	7	112	210	B. abortus	Cattle	United States
SRR3096381	20452	B09-0009	4	5	3	12	2	2	3	3	6	43	8	3	5	3	4	7	112	210	B. abortus	Cattle	United States
SRR3096417	20486	B11-0146	4	5	3	12	2	2	3	3	6	43	8	3	5	3	4	7	112	210	B. abortus	Deer/Elk/Reindeer	United States
SRR3096419	20488	B11-0148	4	5	3	12	2	2	3	3	6	43	8	3	6	3	5	6	112	210	B. abortus	Deer/Elk/Reindeer	United States
SRR3096423	20492	B11-0159	4	5	3	12	2	2	3	3	6	43	8	3	5	3	4	8	112	210	B. abortus	Deer/Elk/Reindeer	United States
SRR3096471	20540	B12-0406	4	5	3	12	2	2	3	3	6	43	8	3	5	3	4	5	112	210	B. abortus	Deer/Elk/Reindeer	United States
SRR3096481	20550	B12-0416	4	5	3	12	2	2	3	3	6	43	8	3	5	3	5	6	112	210	B. abortus	Deer/Elk/Reindeer	United States
SRR3096510	20574	B-GF032709	4	5	3	12	2	2	3	3	6	43	8	3	5	3	5	6	112	210	B. abortus	Deer/Elk/Reindeer	United States
SRR1371376	20313	B95-0236	4	5	4	12	2	2	3	3	7	43	8	3	4	3	7	5	28	227	B. abortus	Cattle	United States
2006LeFleche#136	136	BfR 96	4	5	4	12	1	3	3	3	6	43	8	3	4	3	3	5	31	74	B. abortus bv1	Cattle	Zimbabwe
2006LeFleche#137	137	BfR 97	4	5	4	12	2	2	3	1	6	43	8	3	4	3	3	6	37	77	B. abortus bv1	Cattle	Zimbabwe
